# Supplementary material for: Transcriptome Profile Analyses of Head Kidney in Roach (Rutilus rutilus), Common Bream (Abramis brama) and Their Hybrids: Does Infection by Monogenean Parasites in Freshwater Fish Reveal Differences in Fish Vigour among Parental Species and Their Hybrids?
Source: MDPI journal article supplement (doi:10.3390/biology12091199), 2023-09-01
Supplement: s1 [file s1]

Figure S1a

GO terms classification

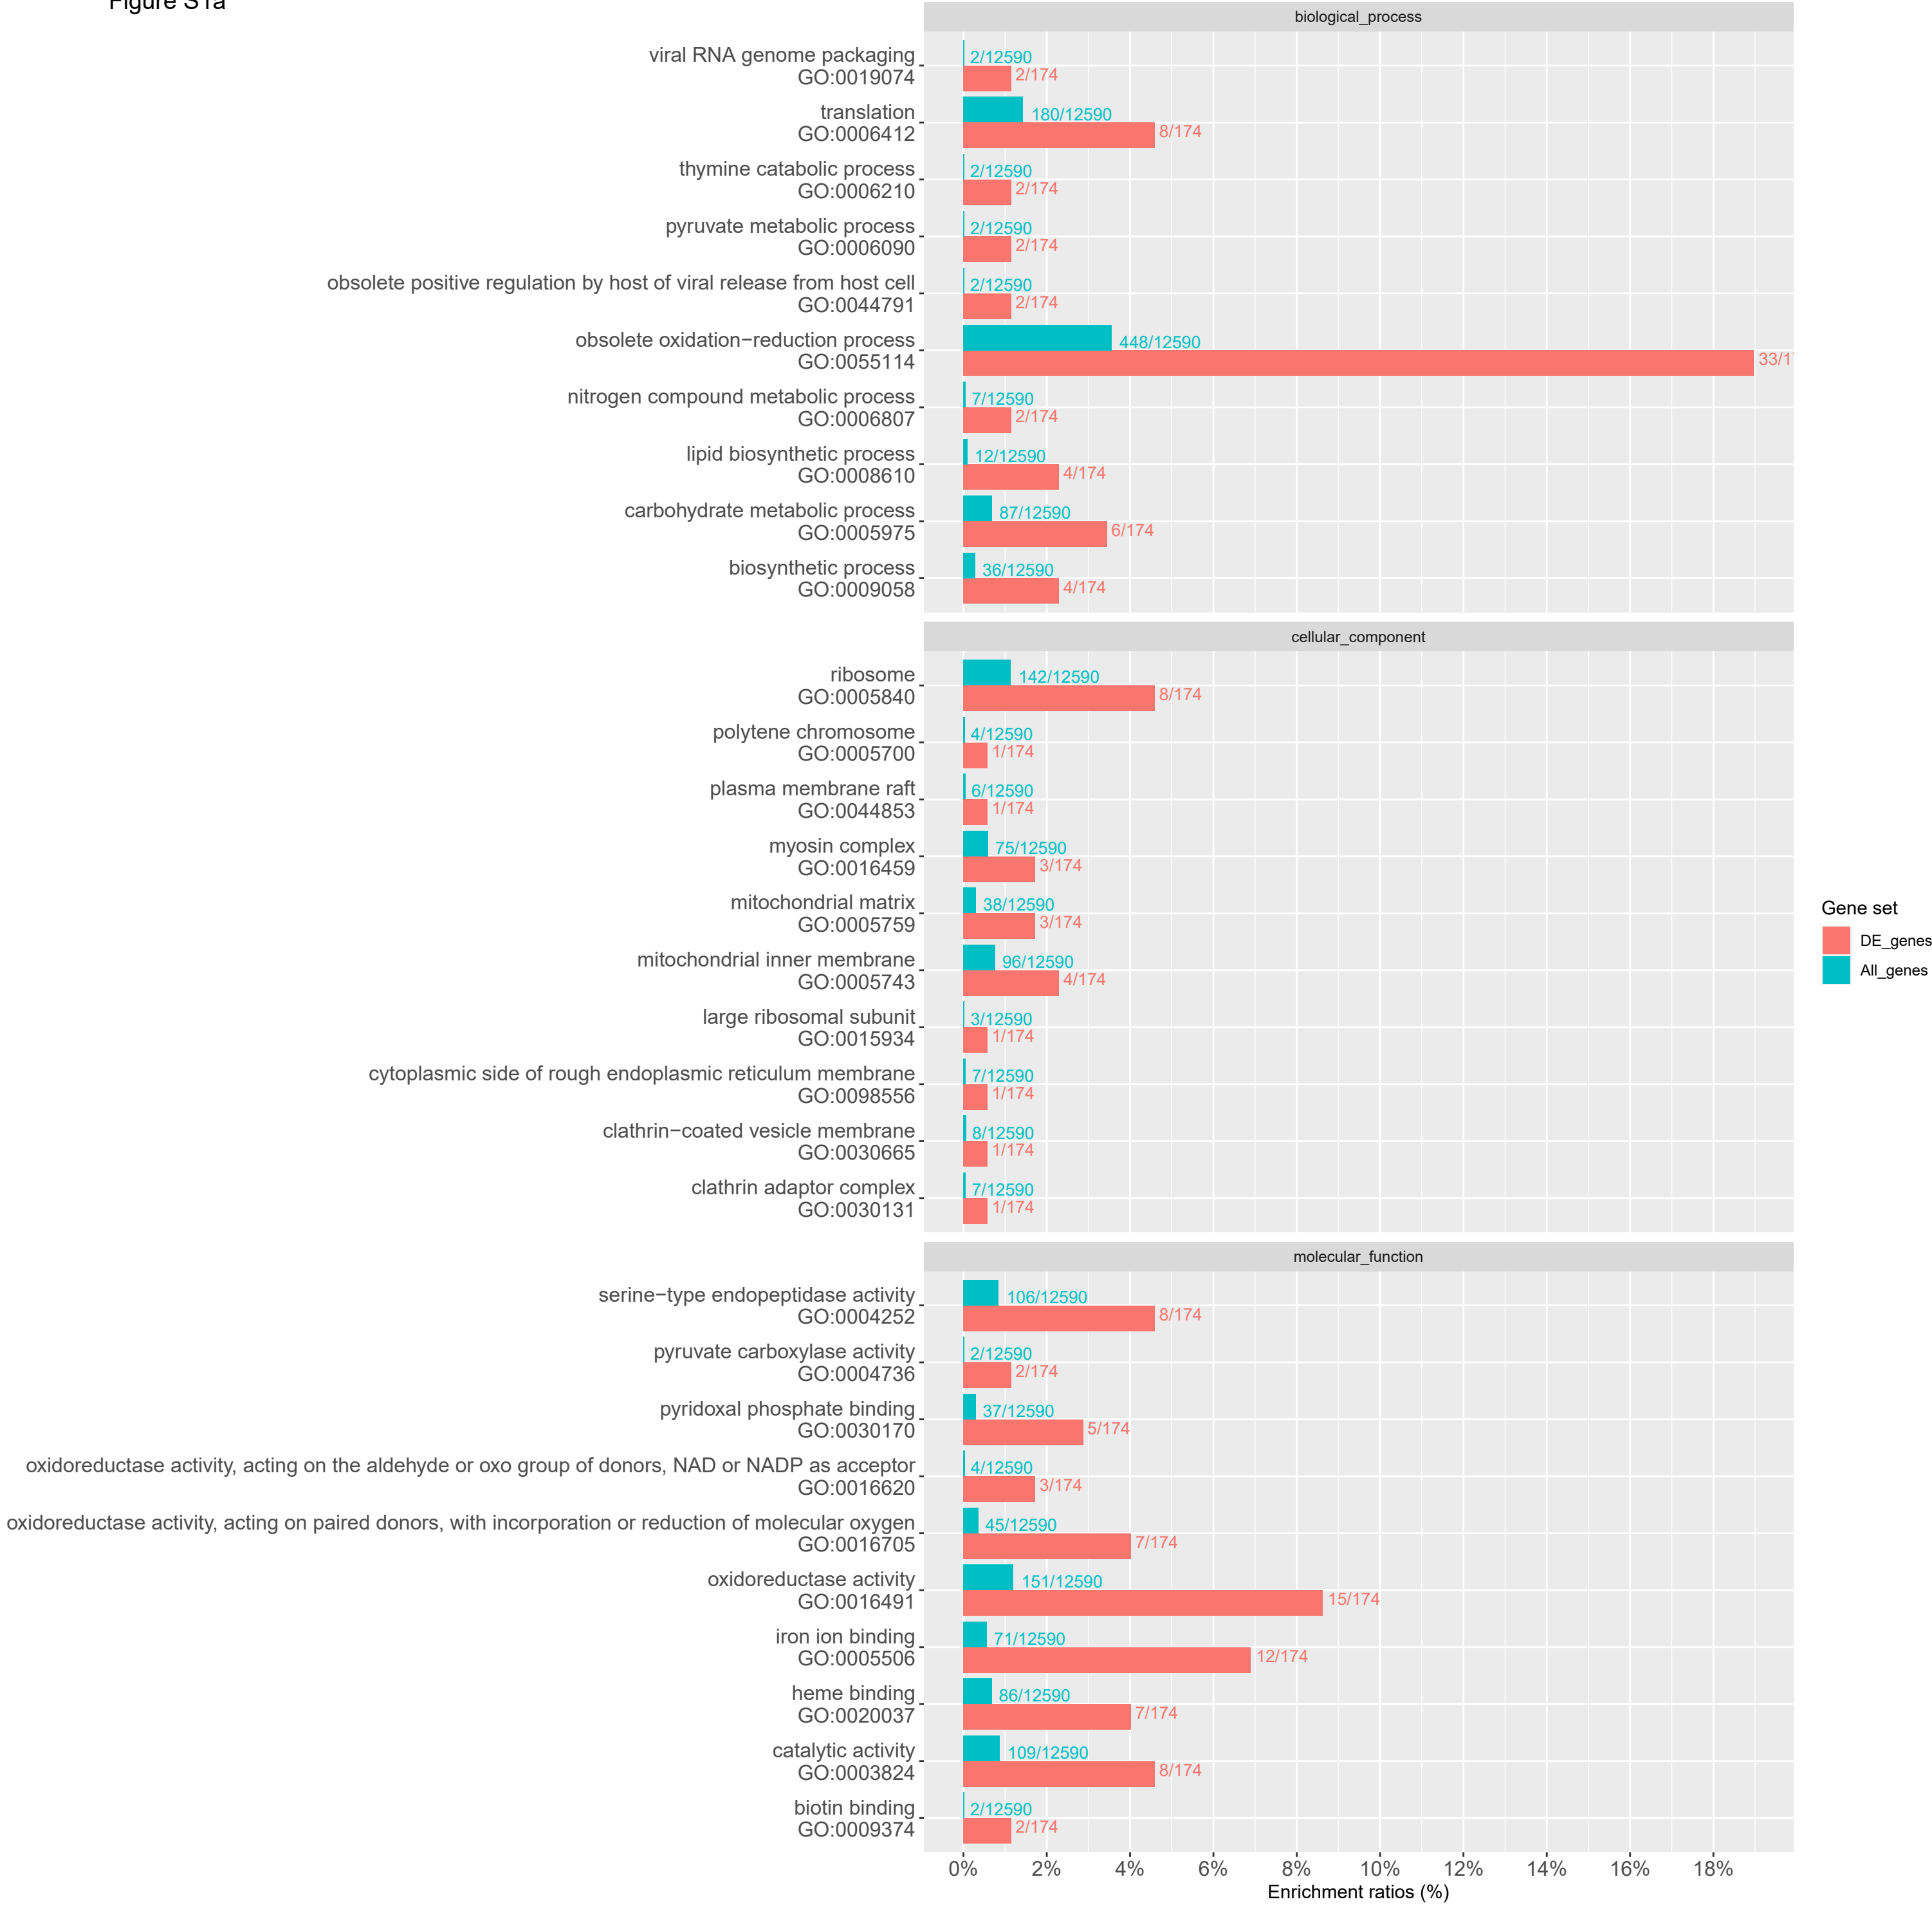

Figure S1b

GO terms classification

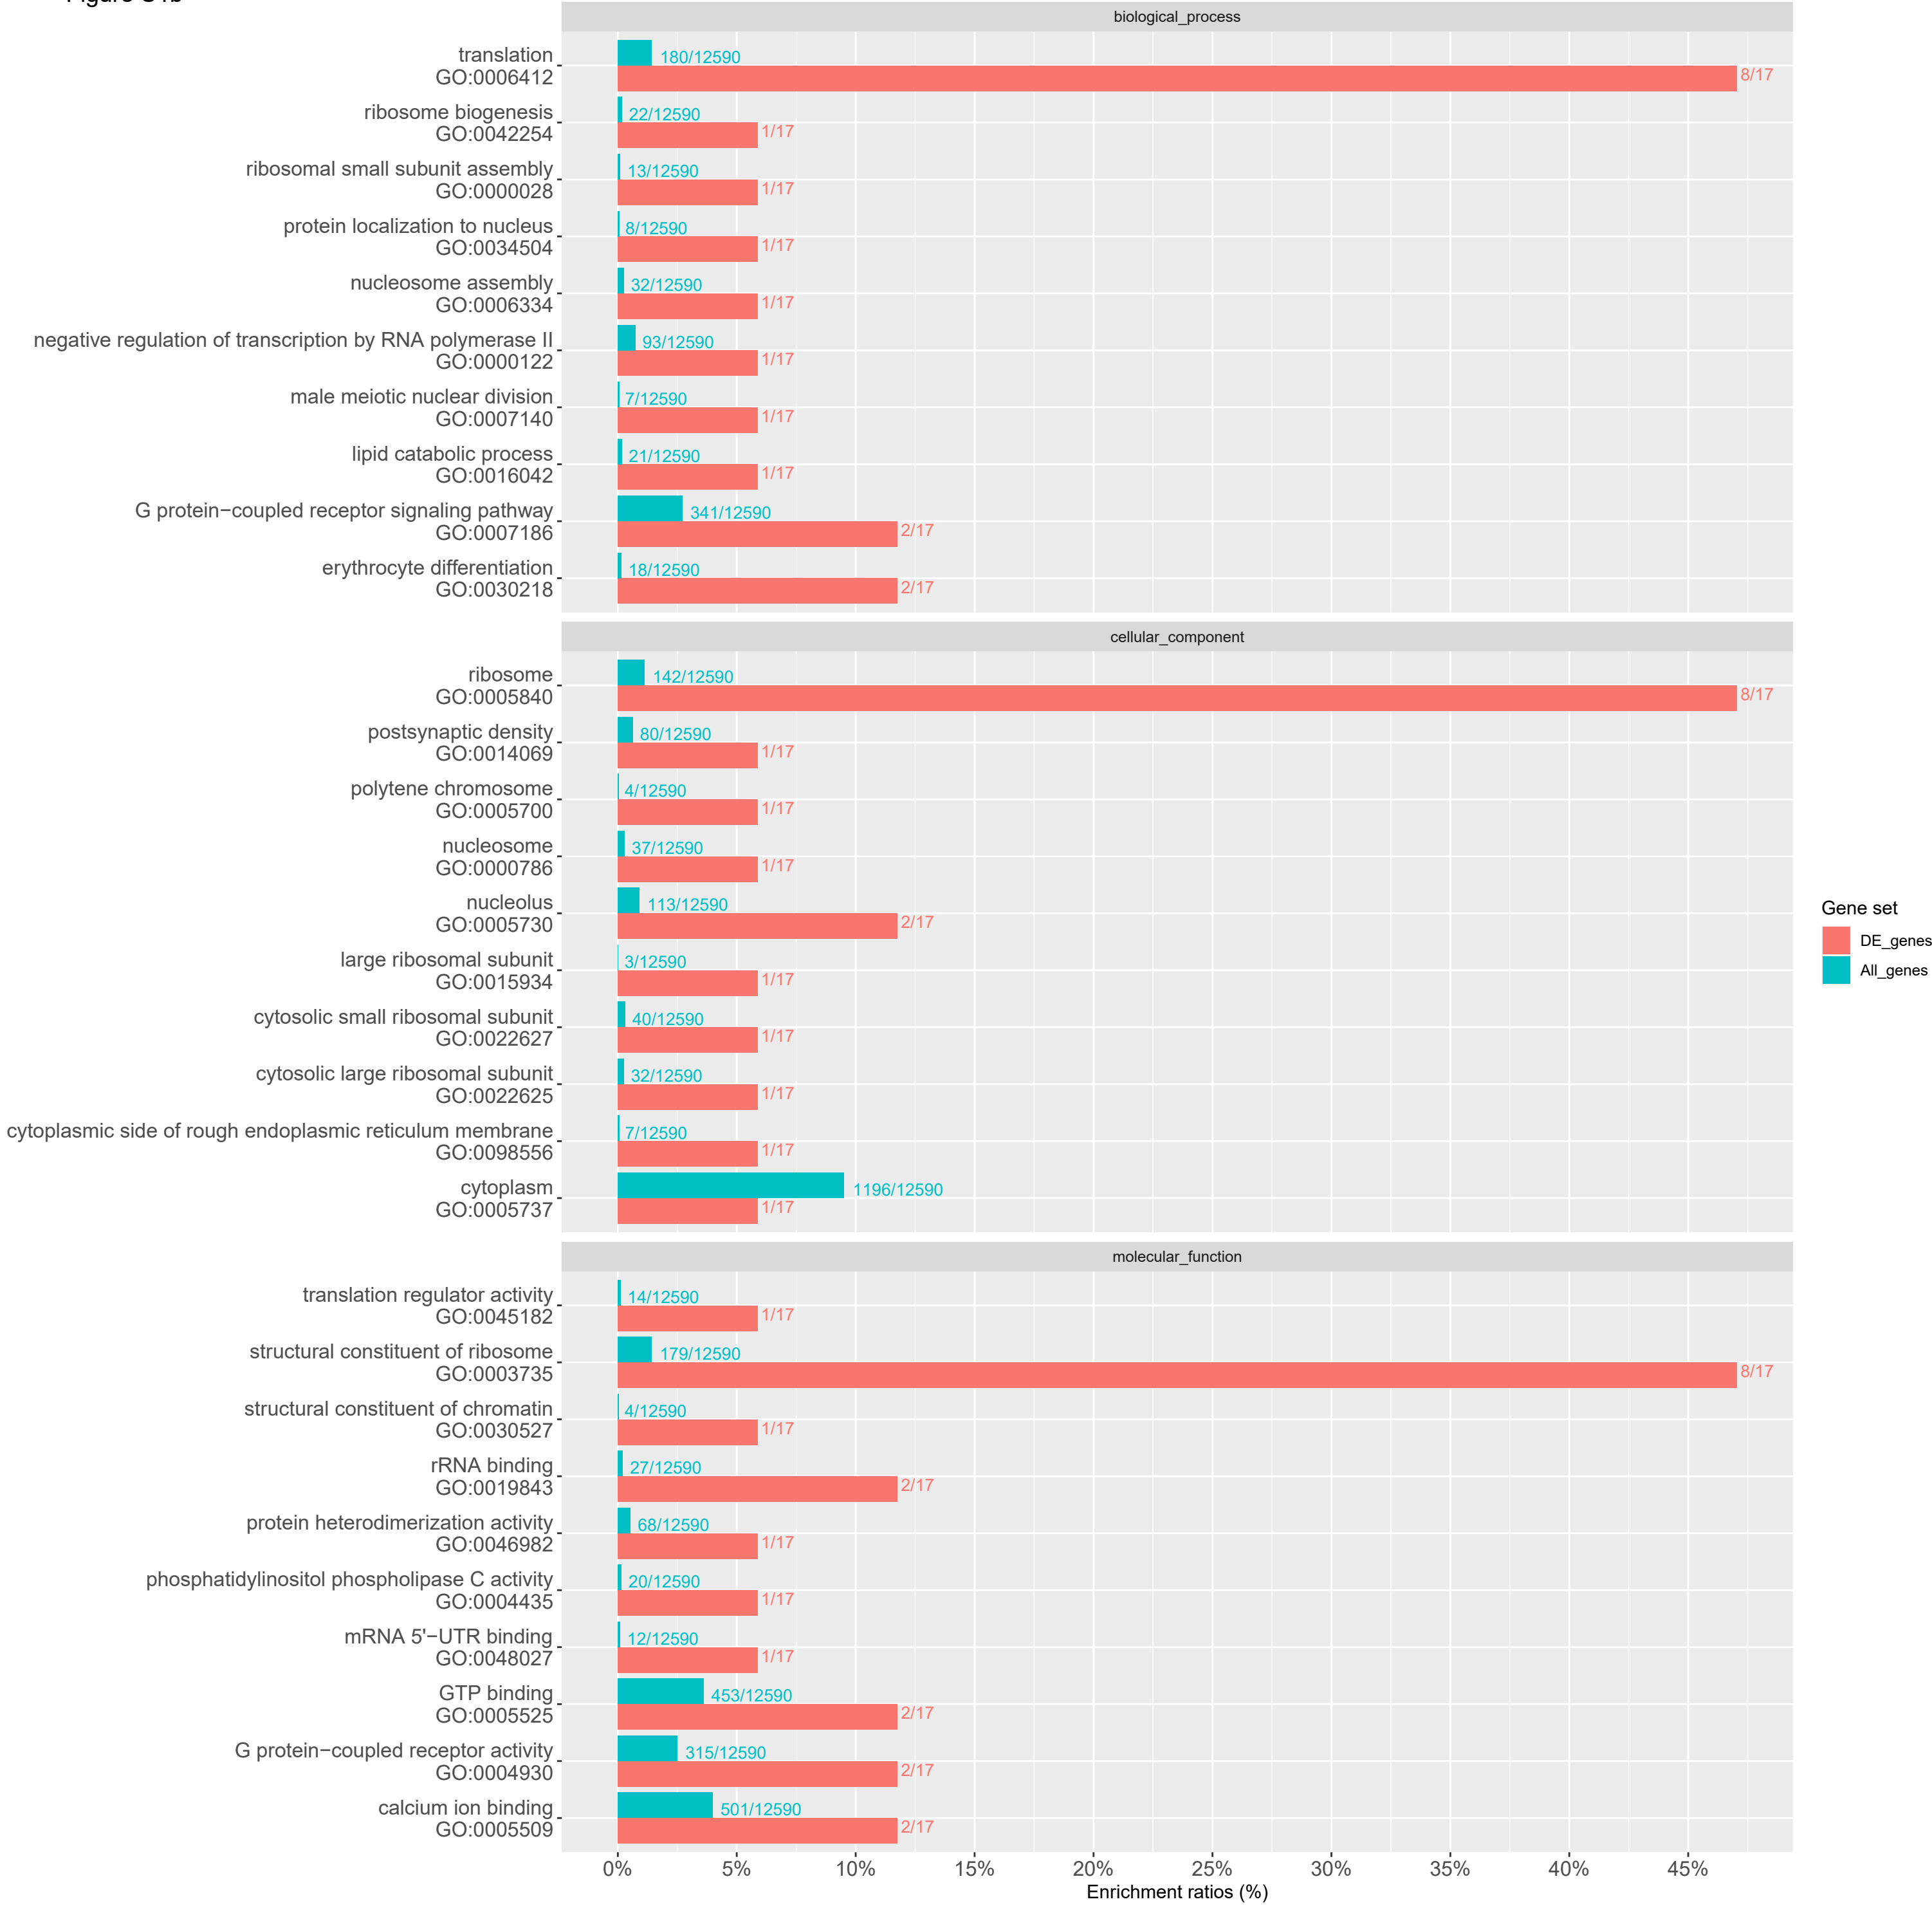

Figure S1c

GO terms classification

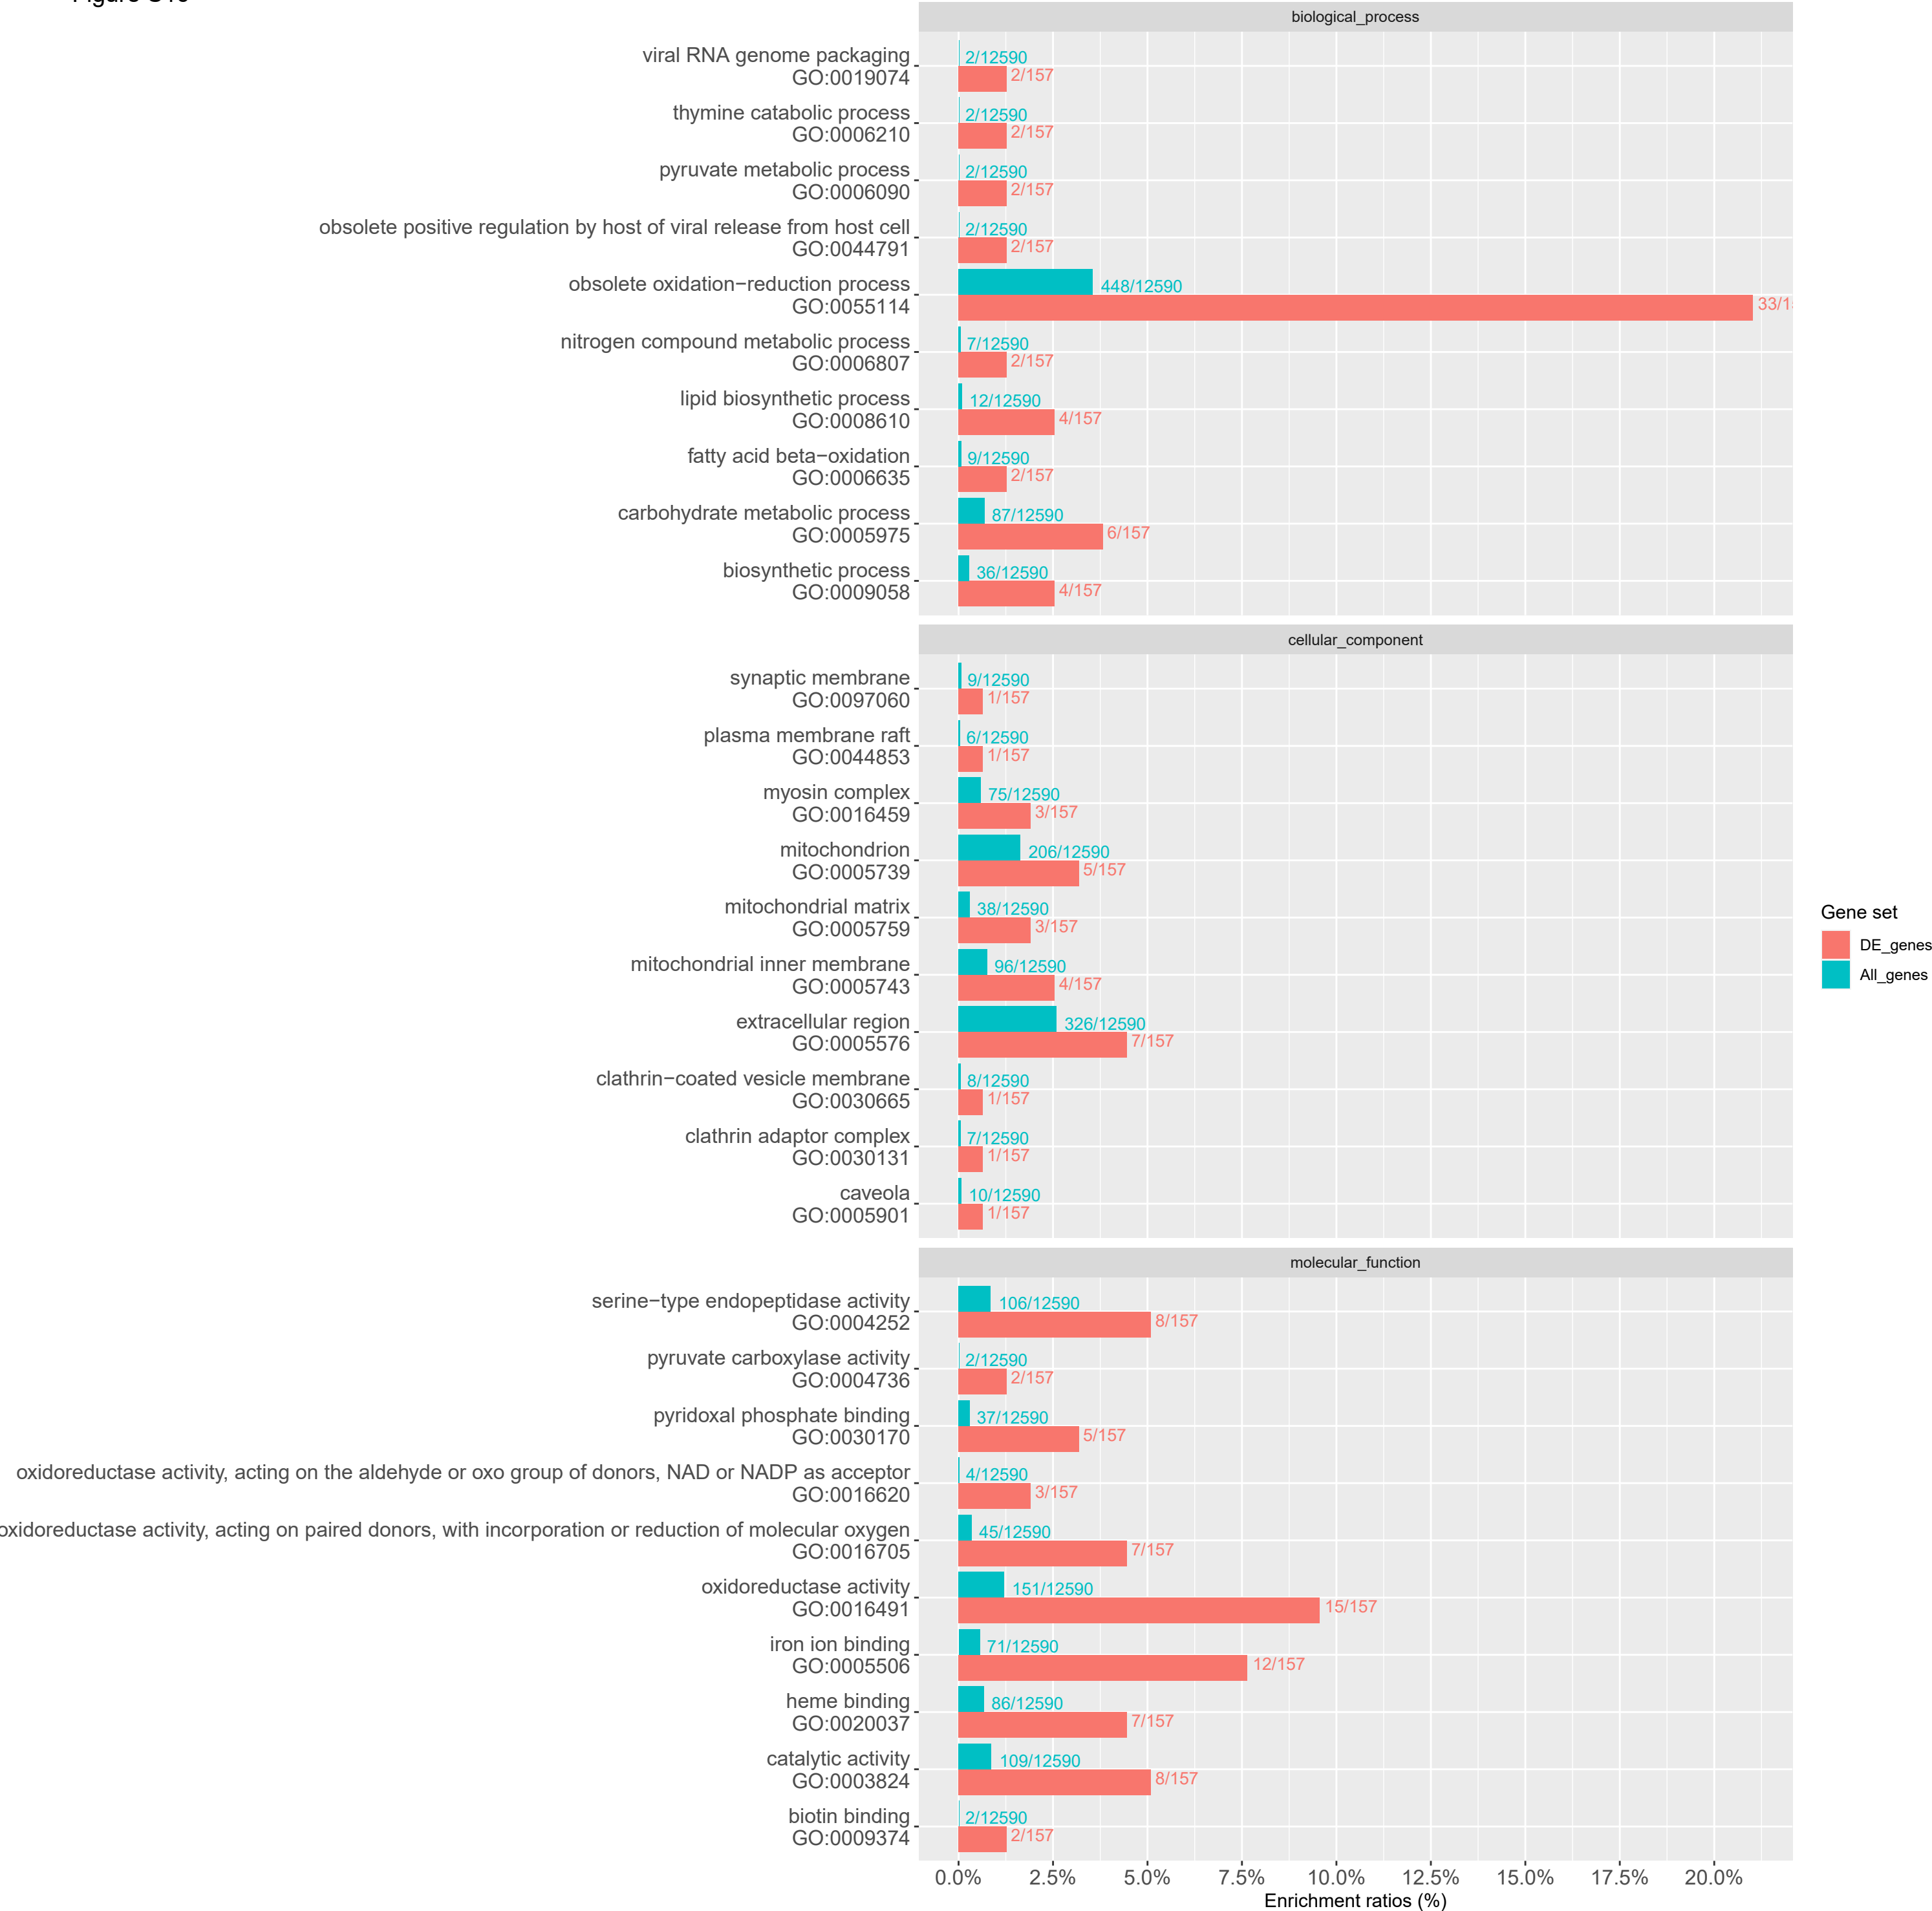

Figure S2a

GO terms classification

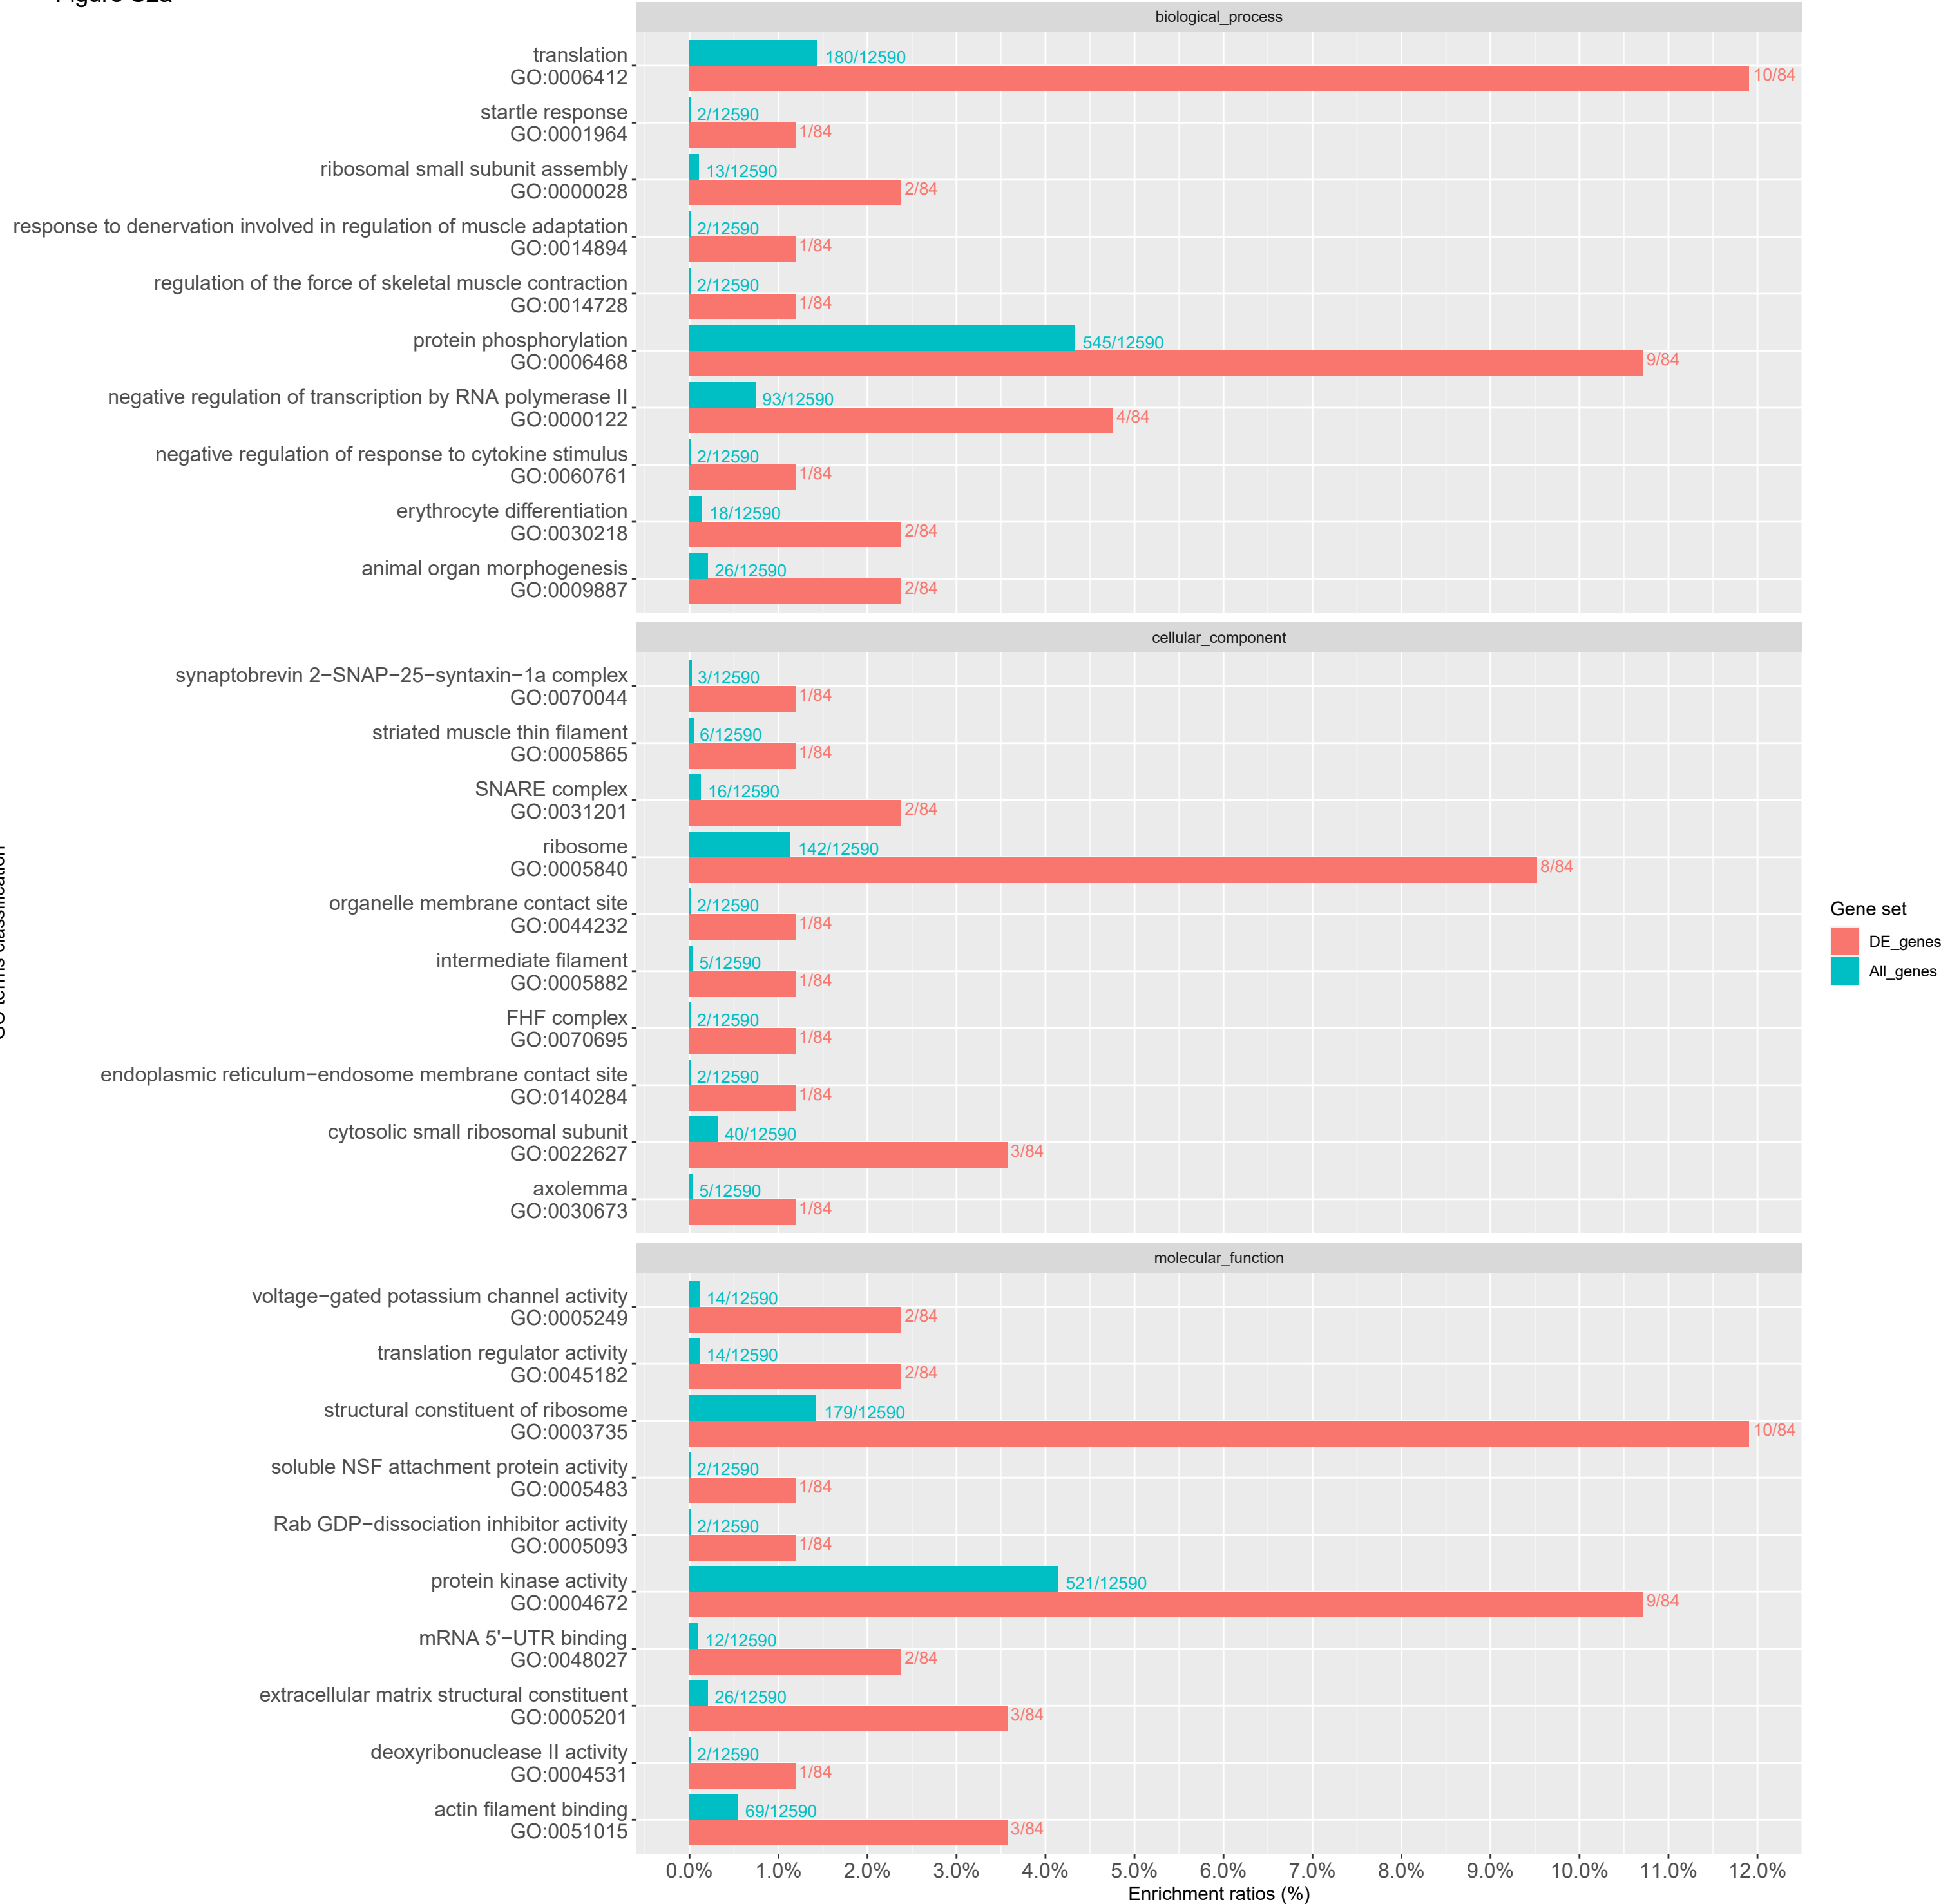

Figure S2b

GO terms classification

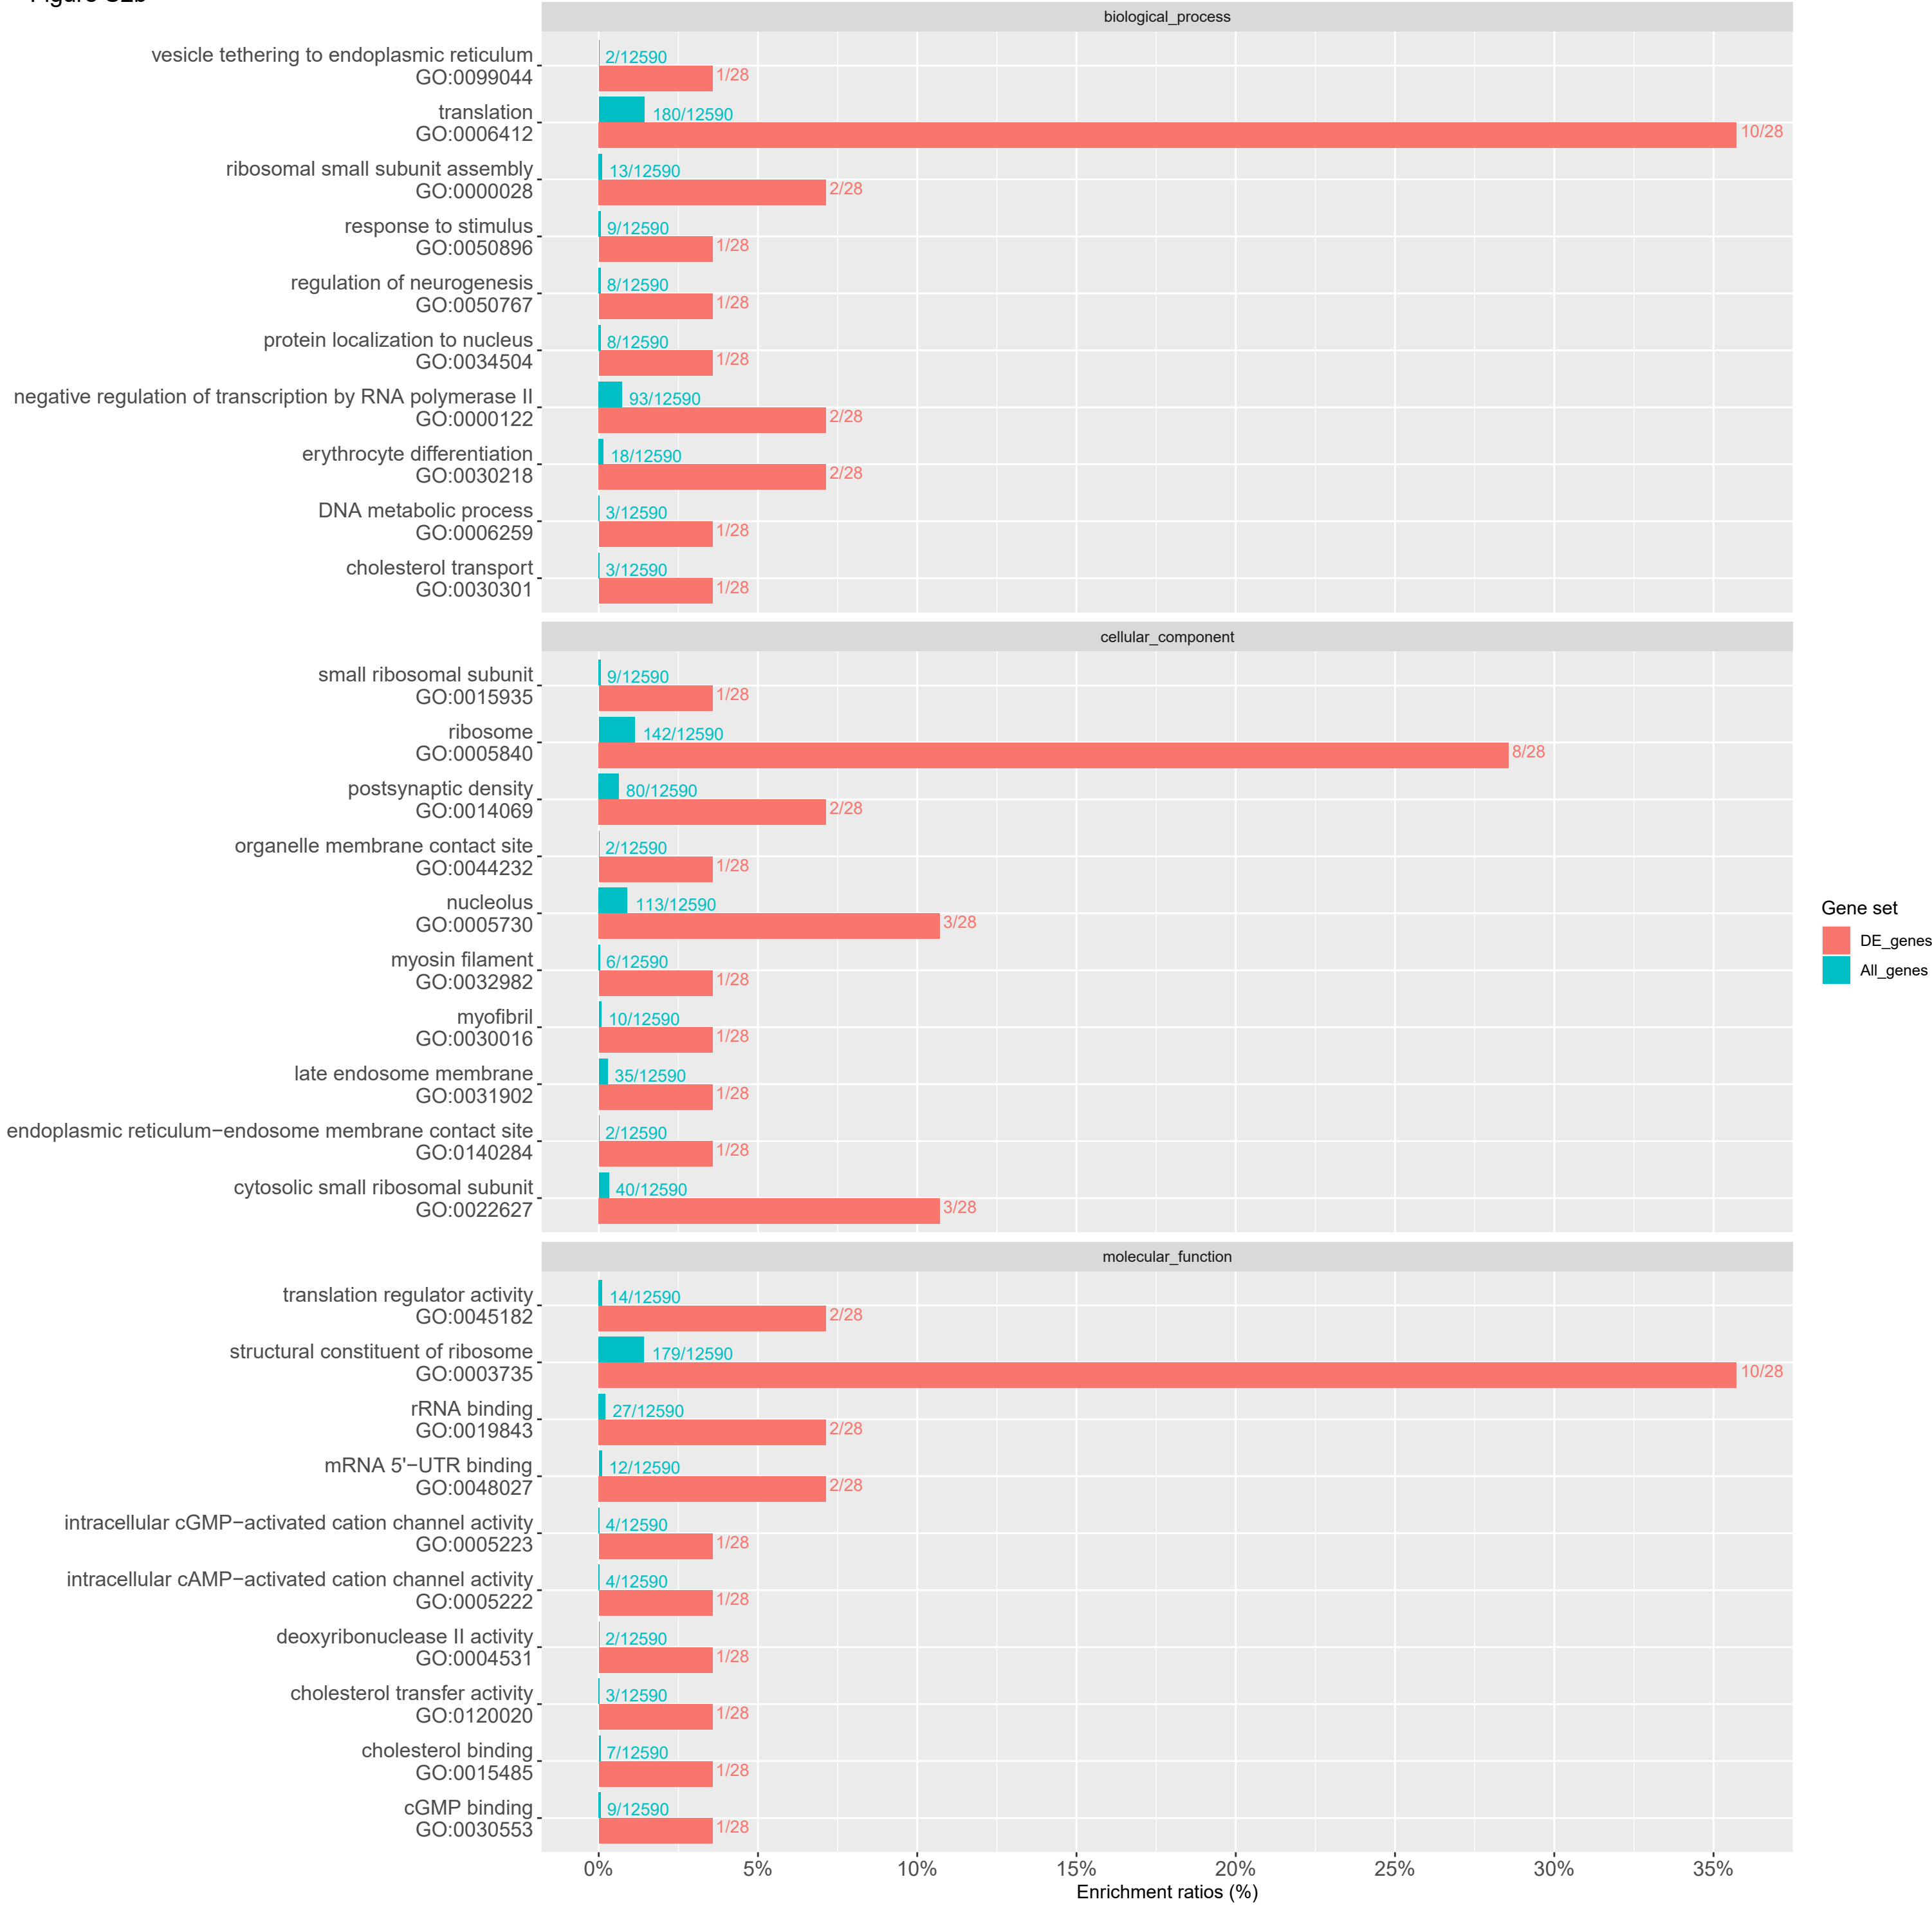

Figure S2c

GO terms classification

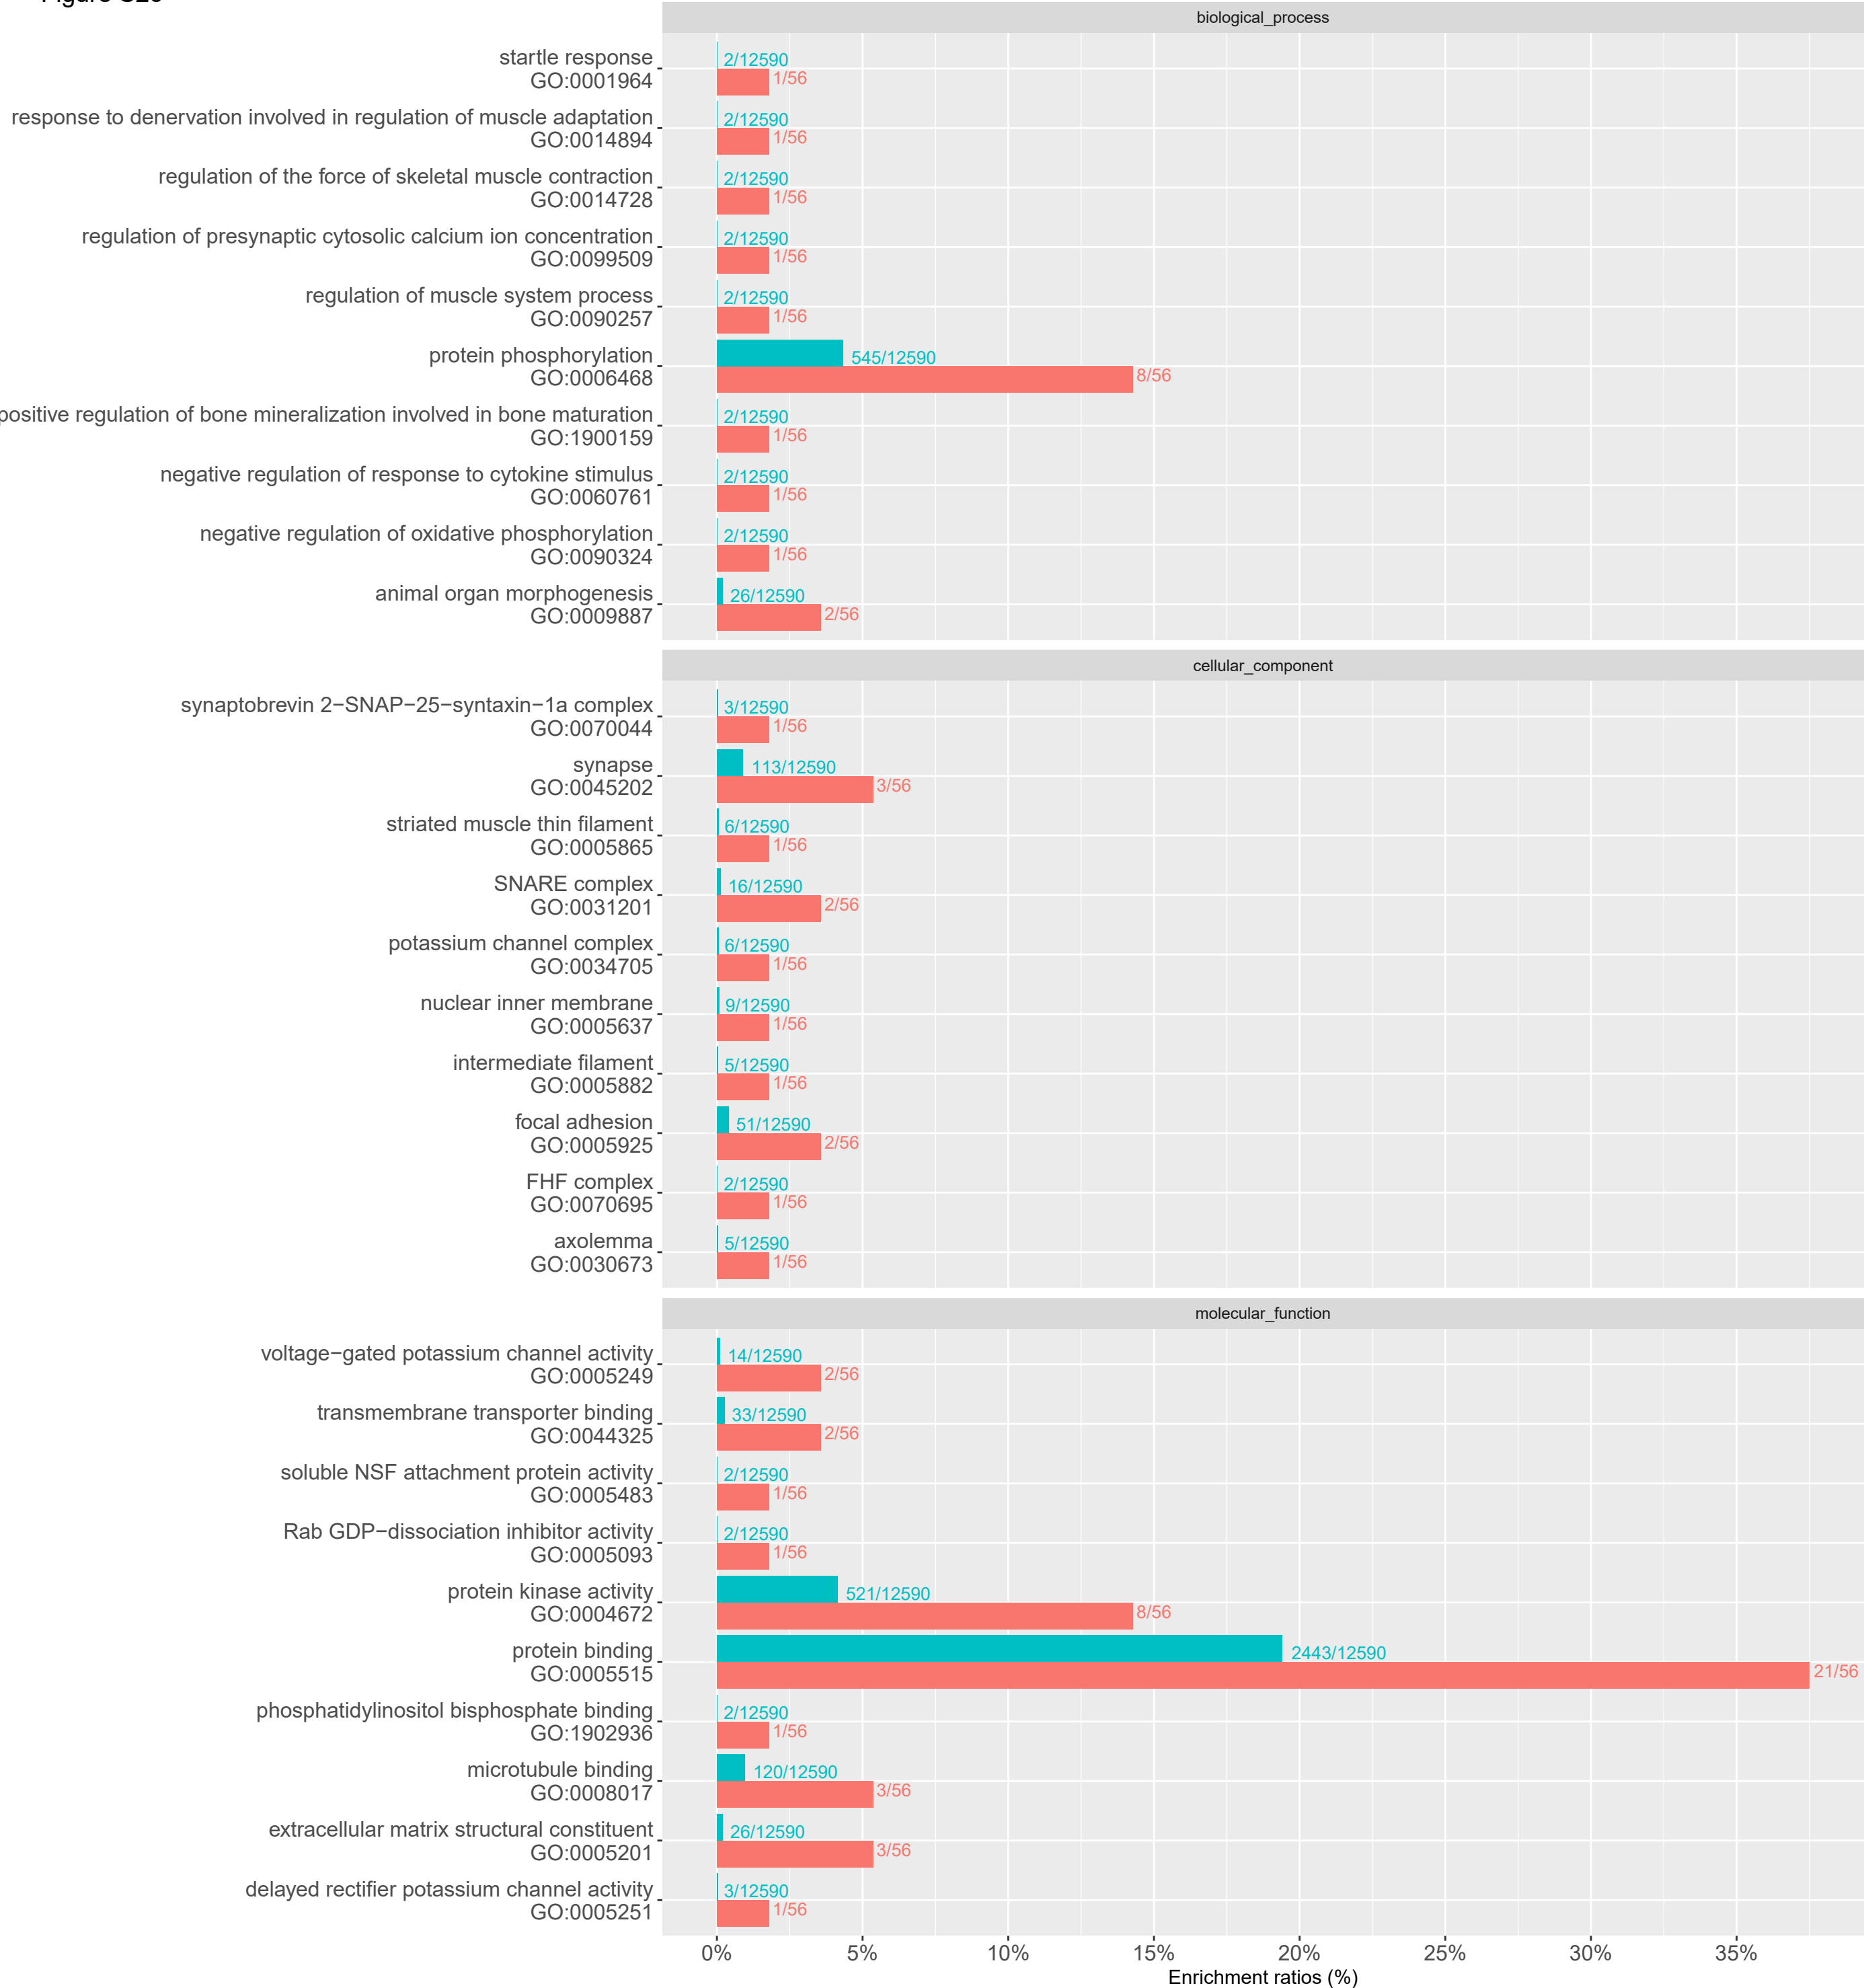

Figure S3a

GO terms classification

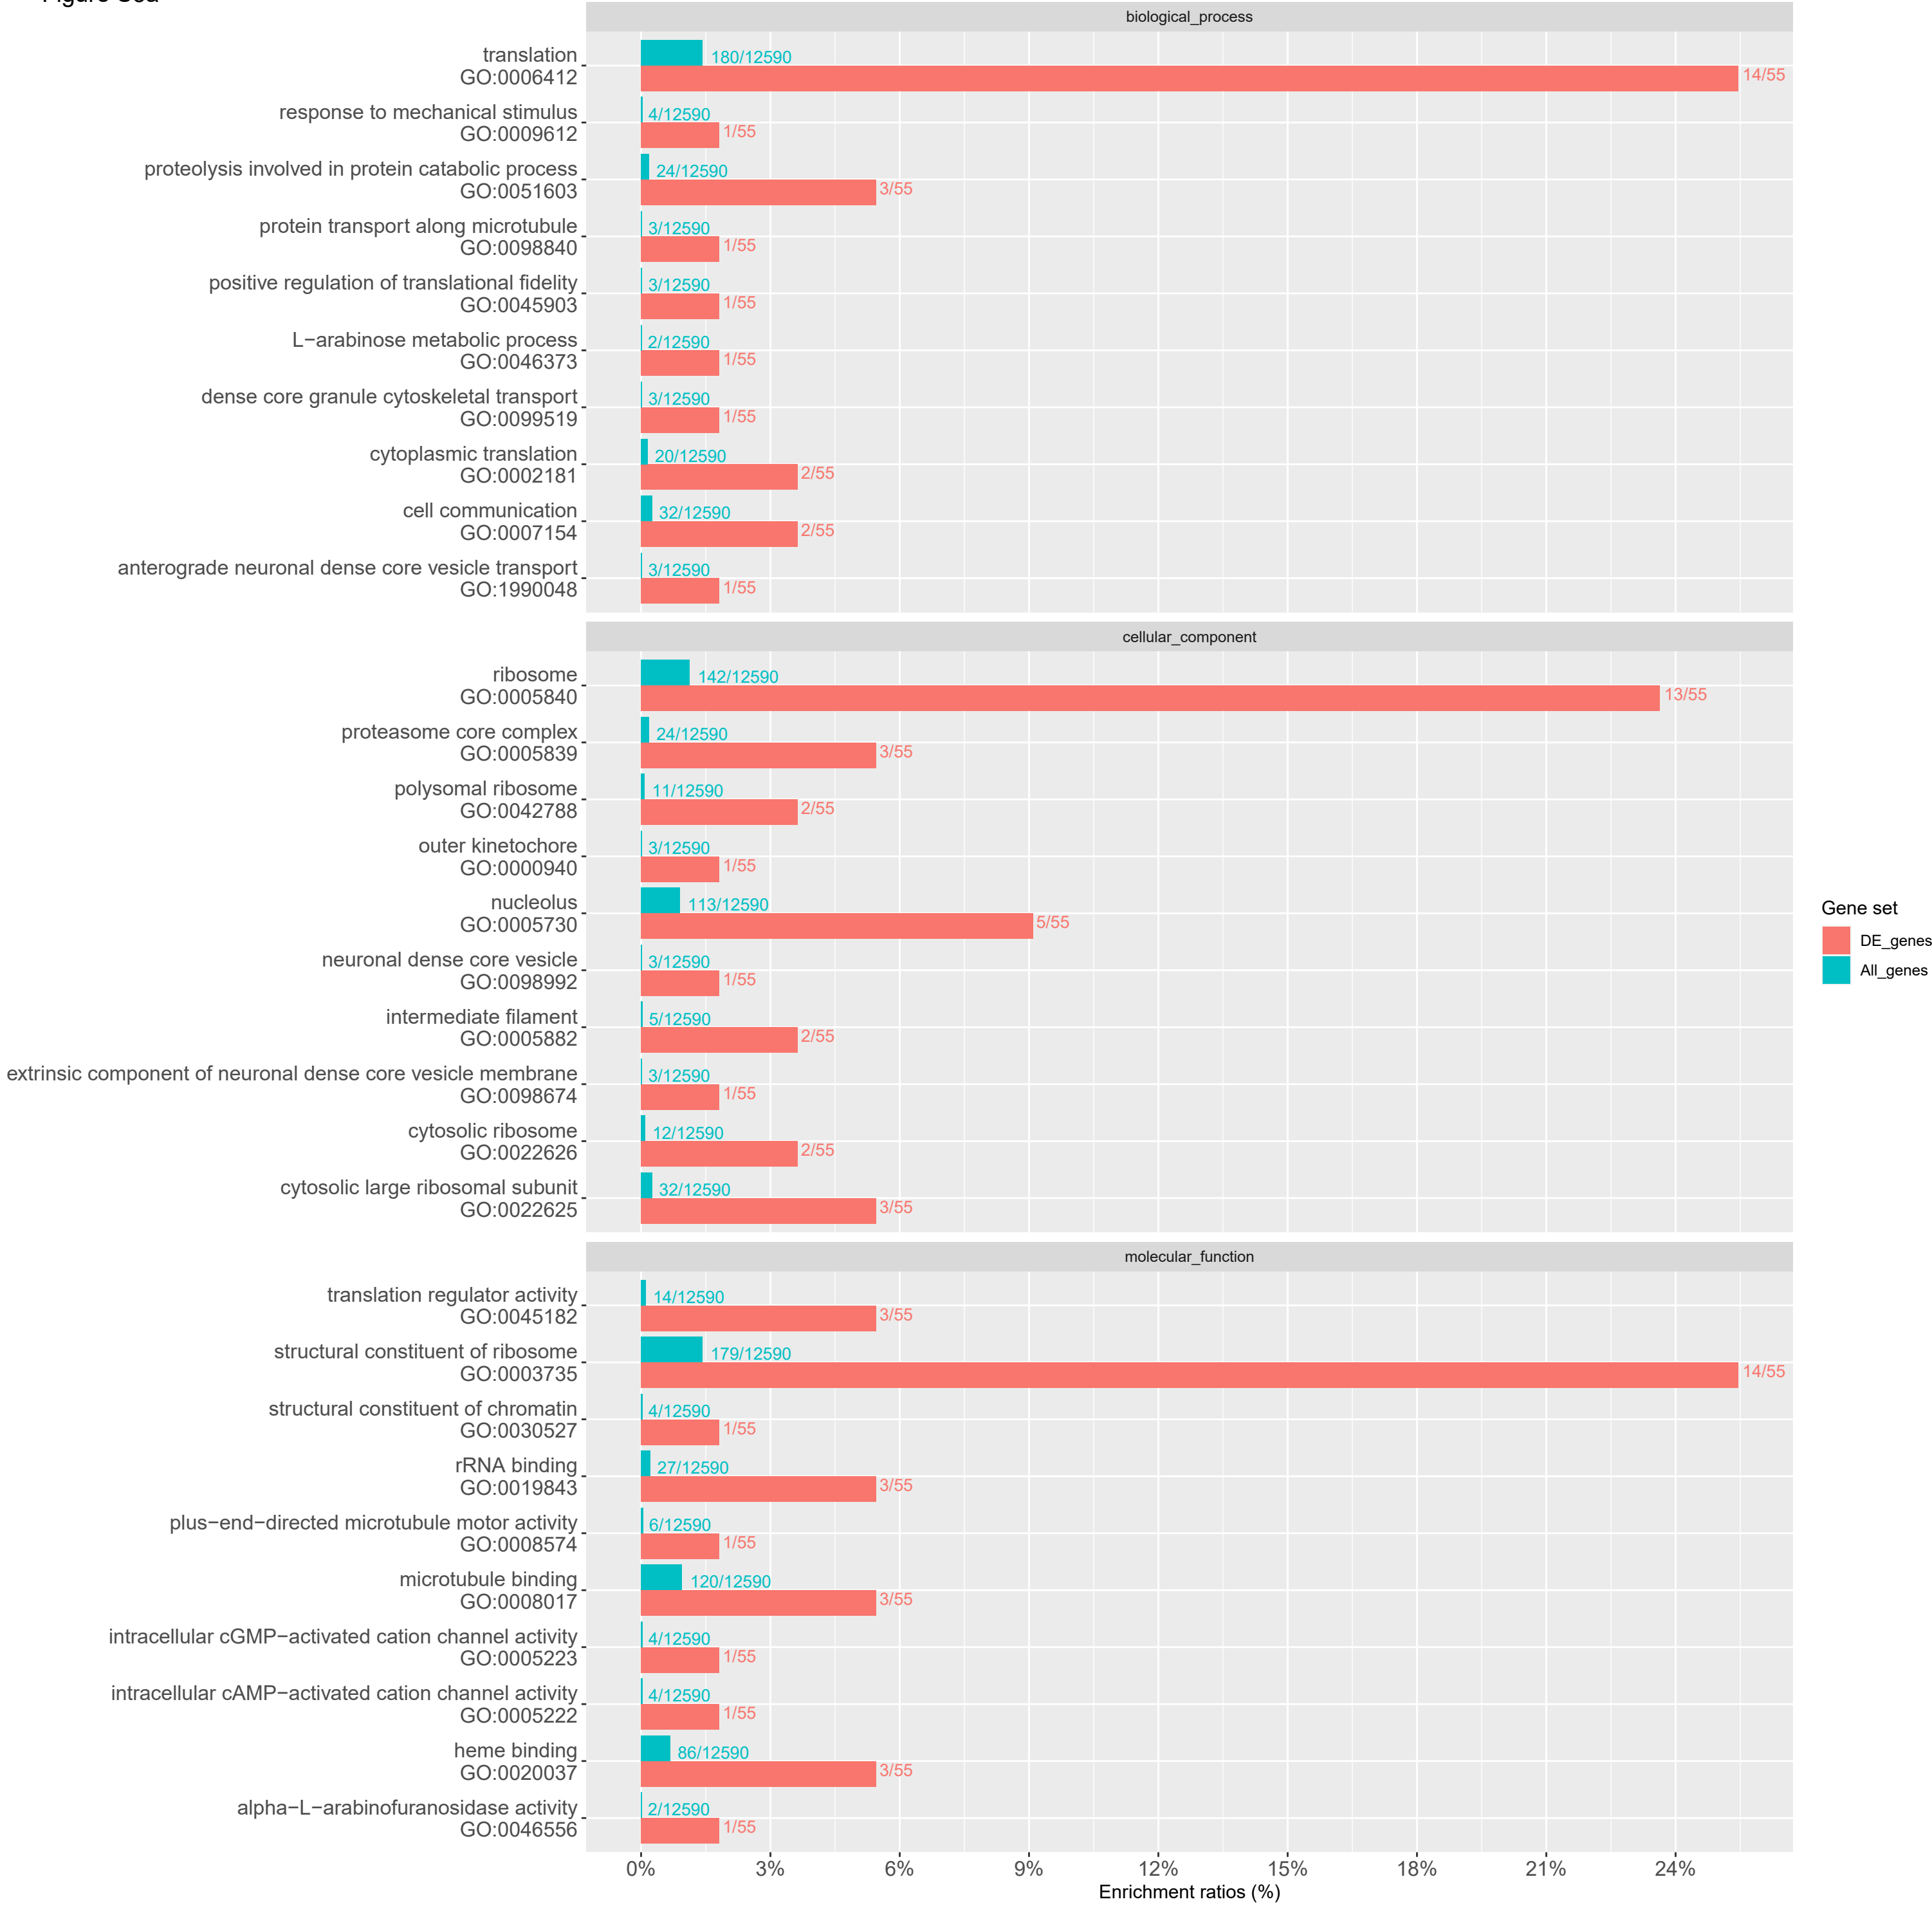

Figure S3b

GO terms classification

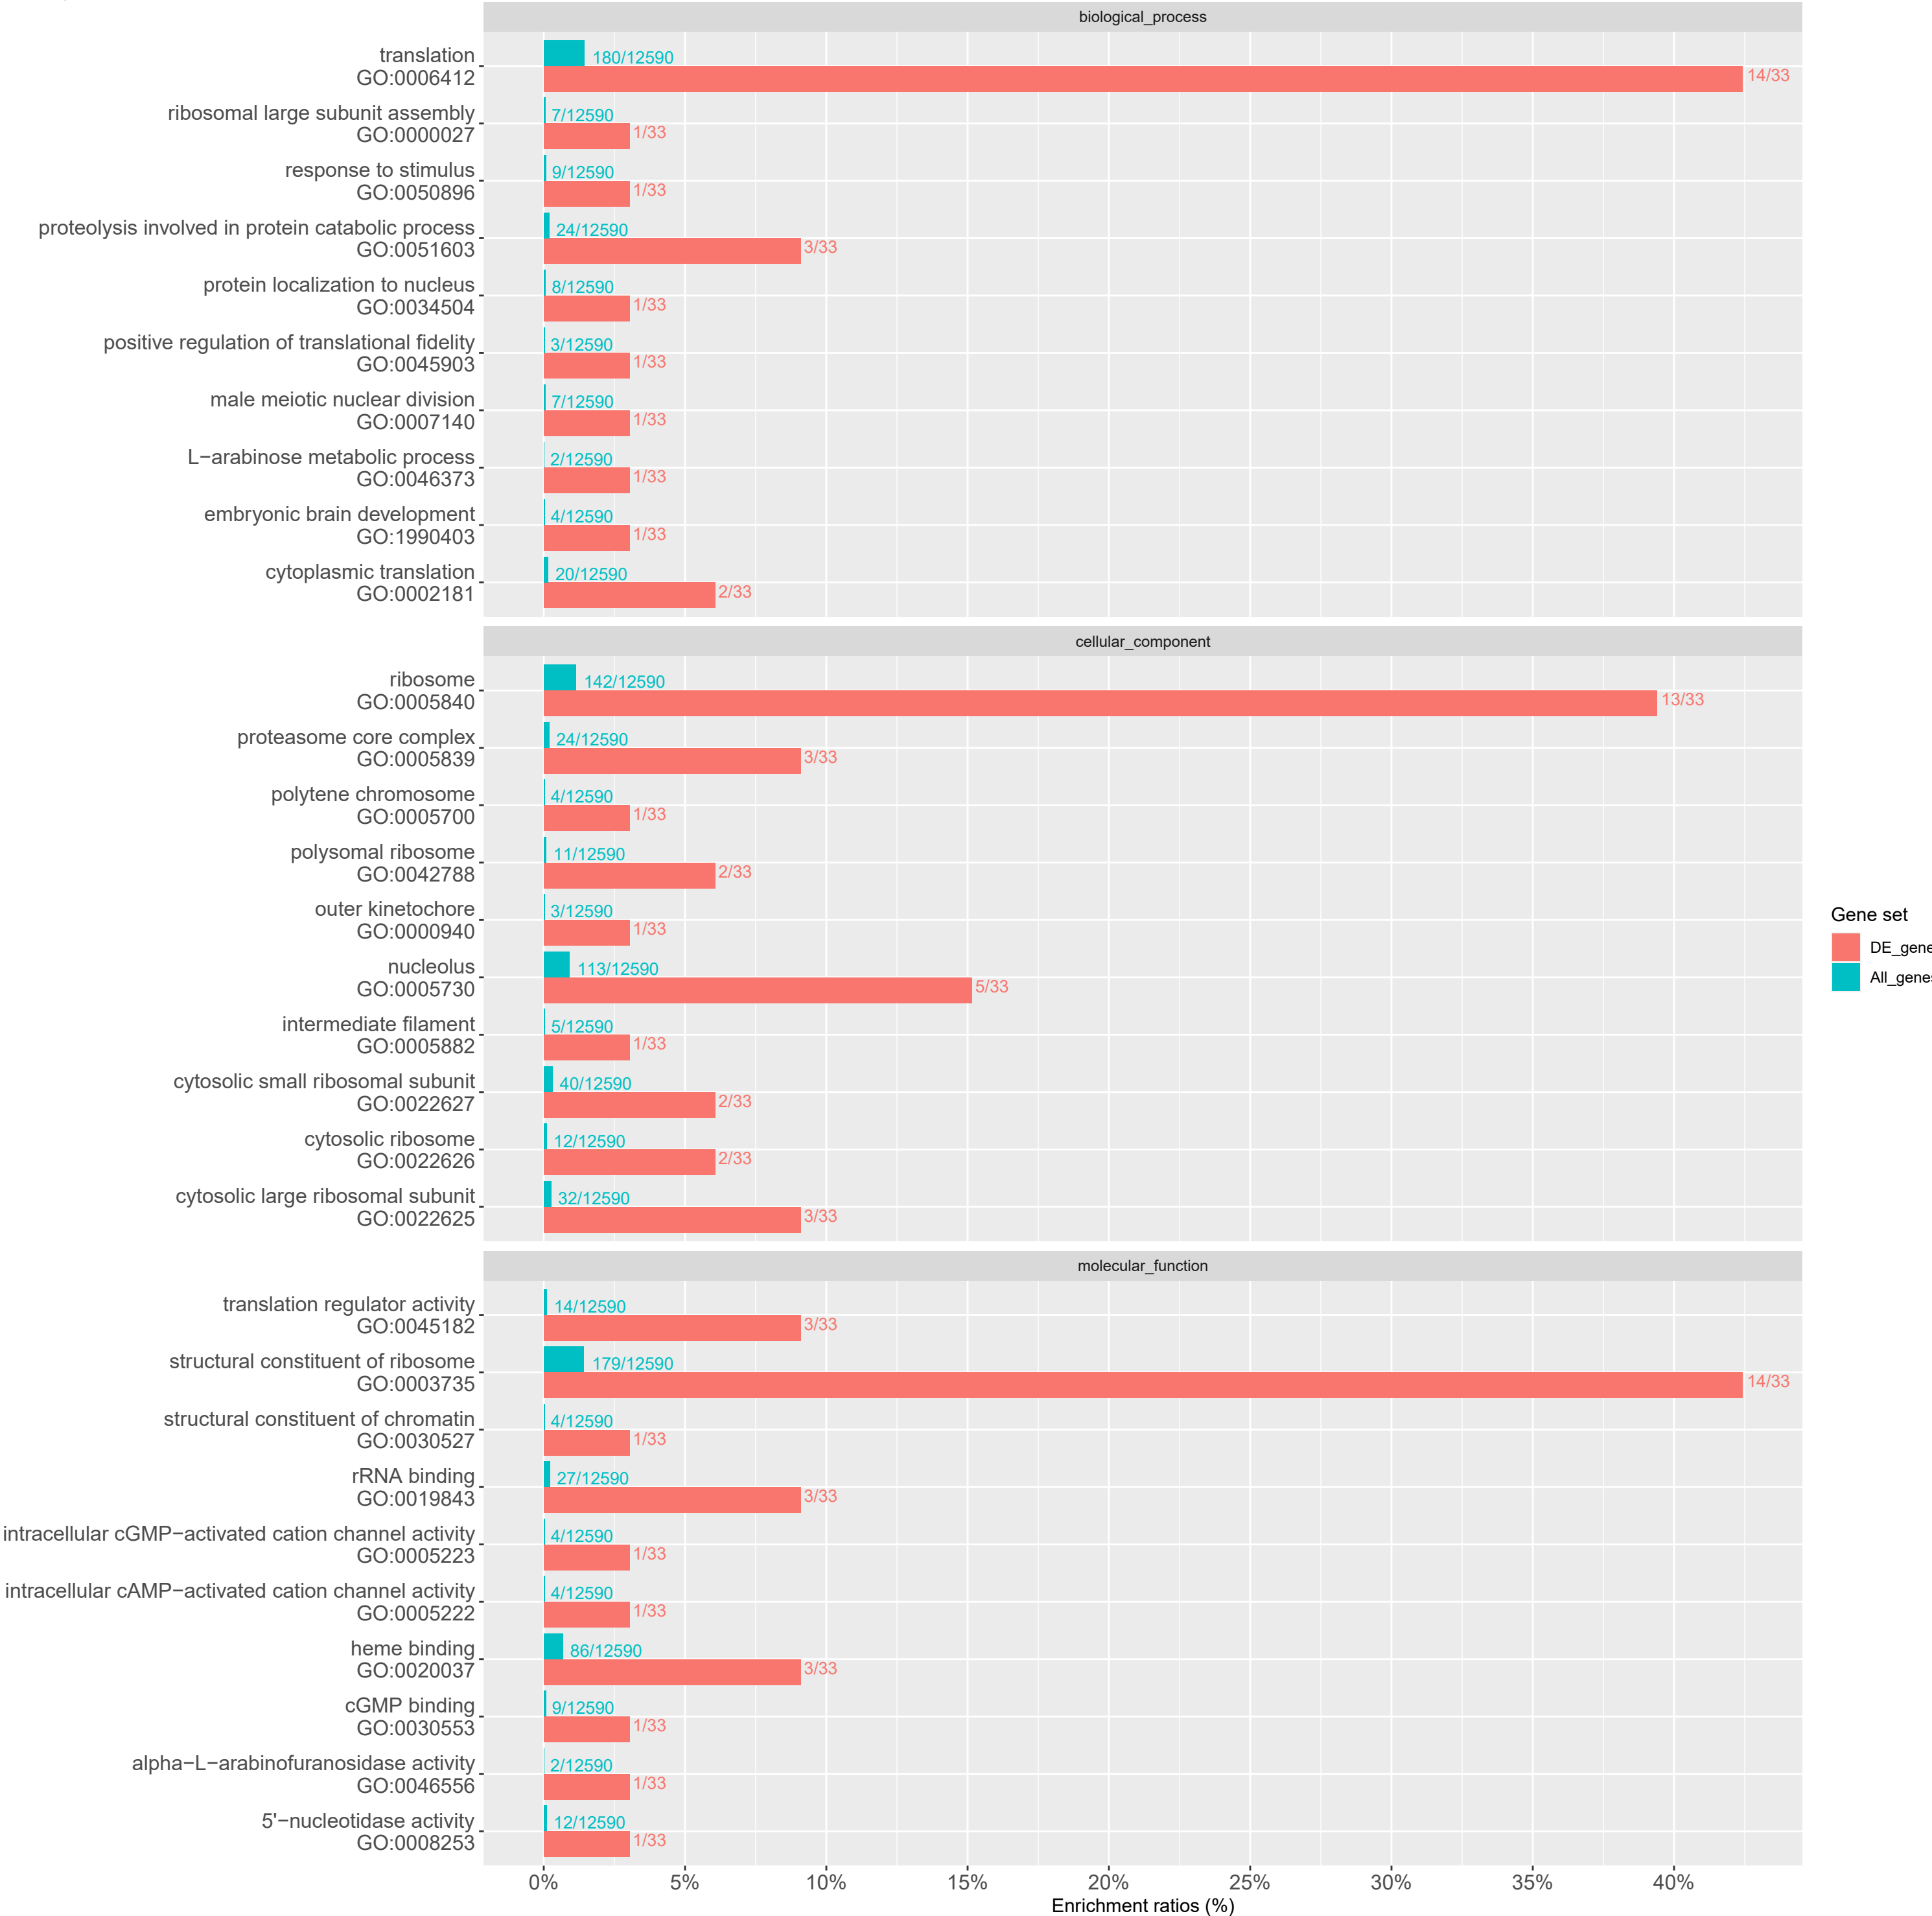

Figure S3c

GO terms classification

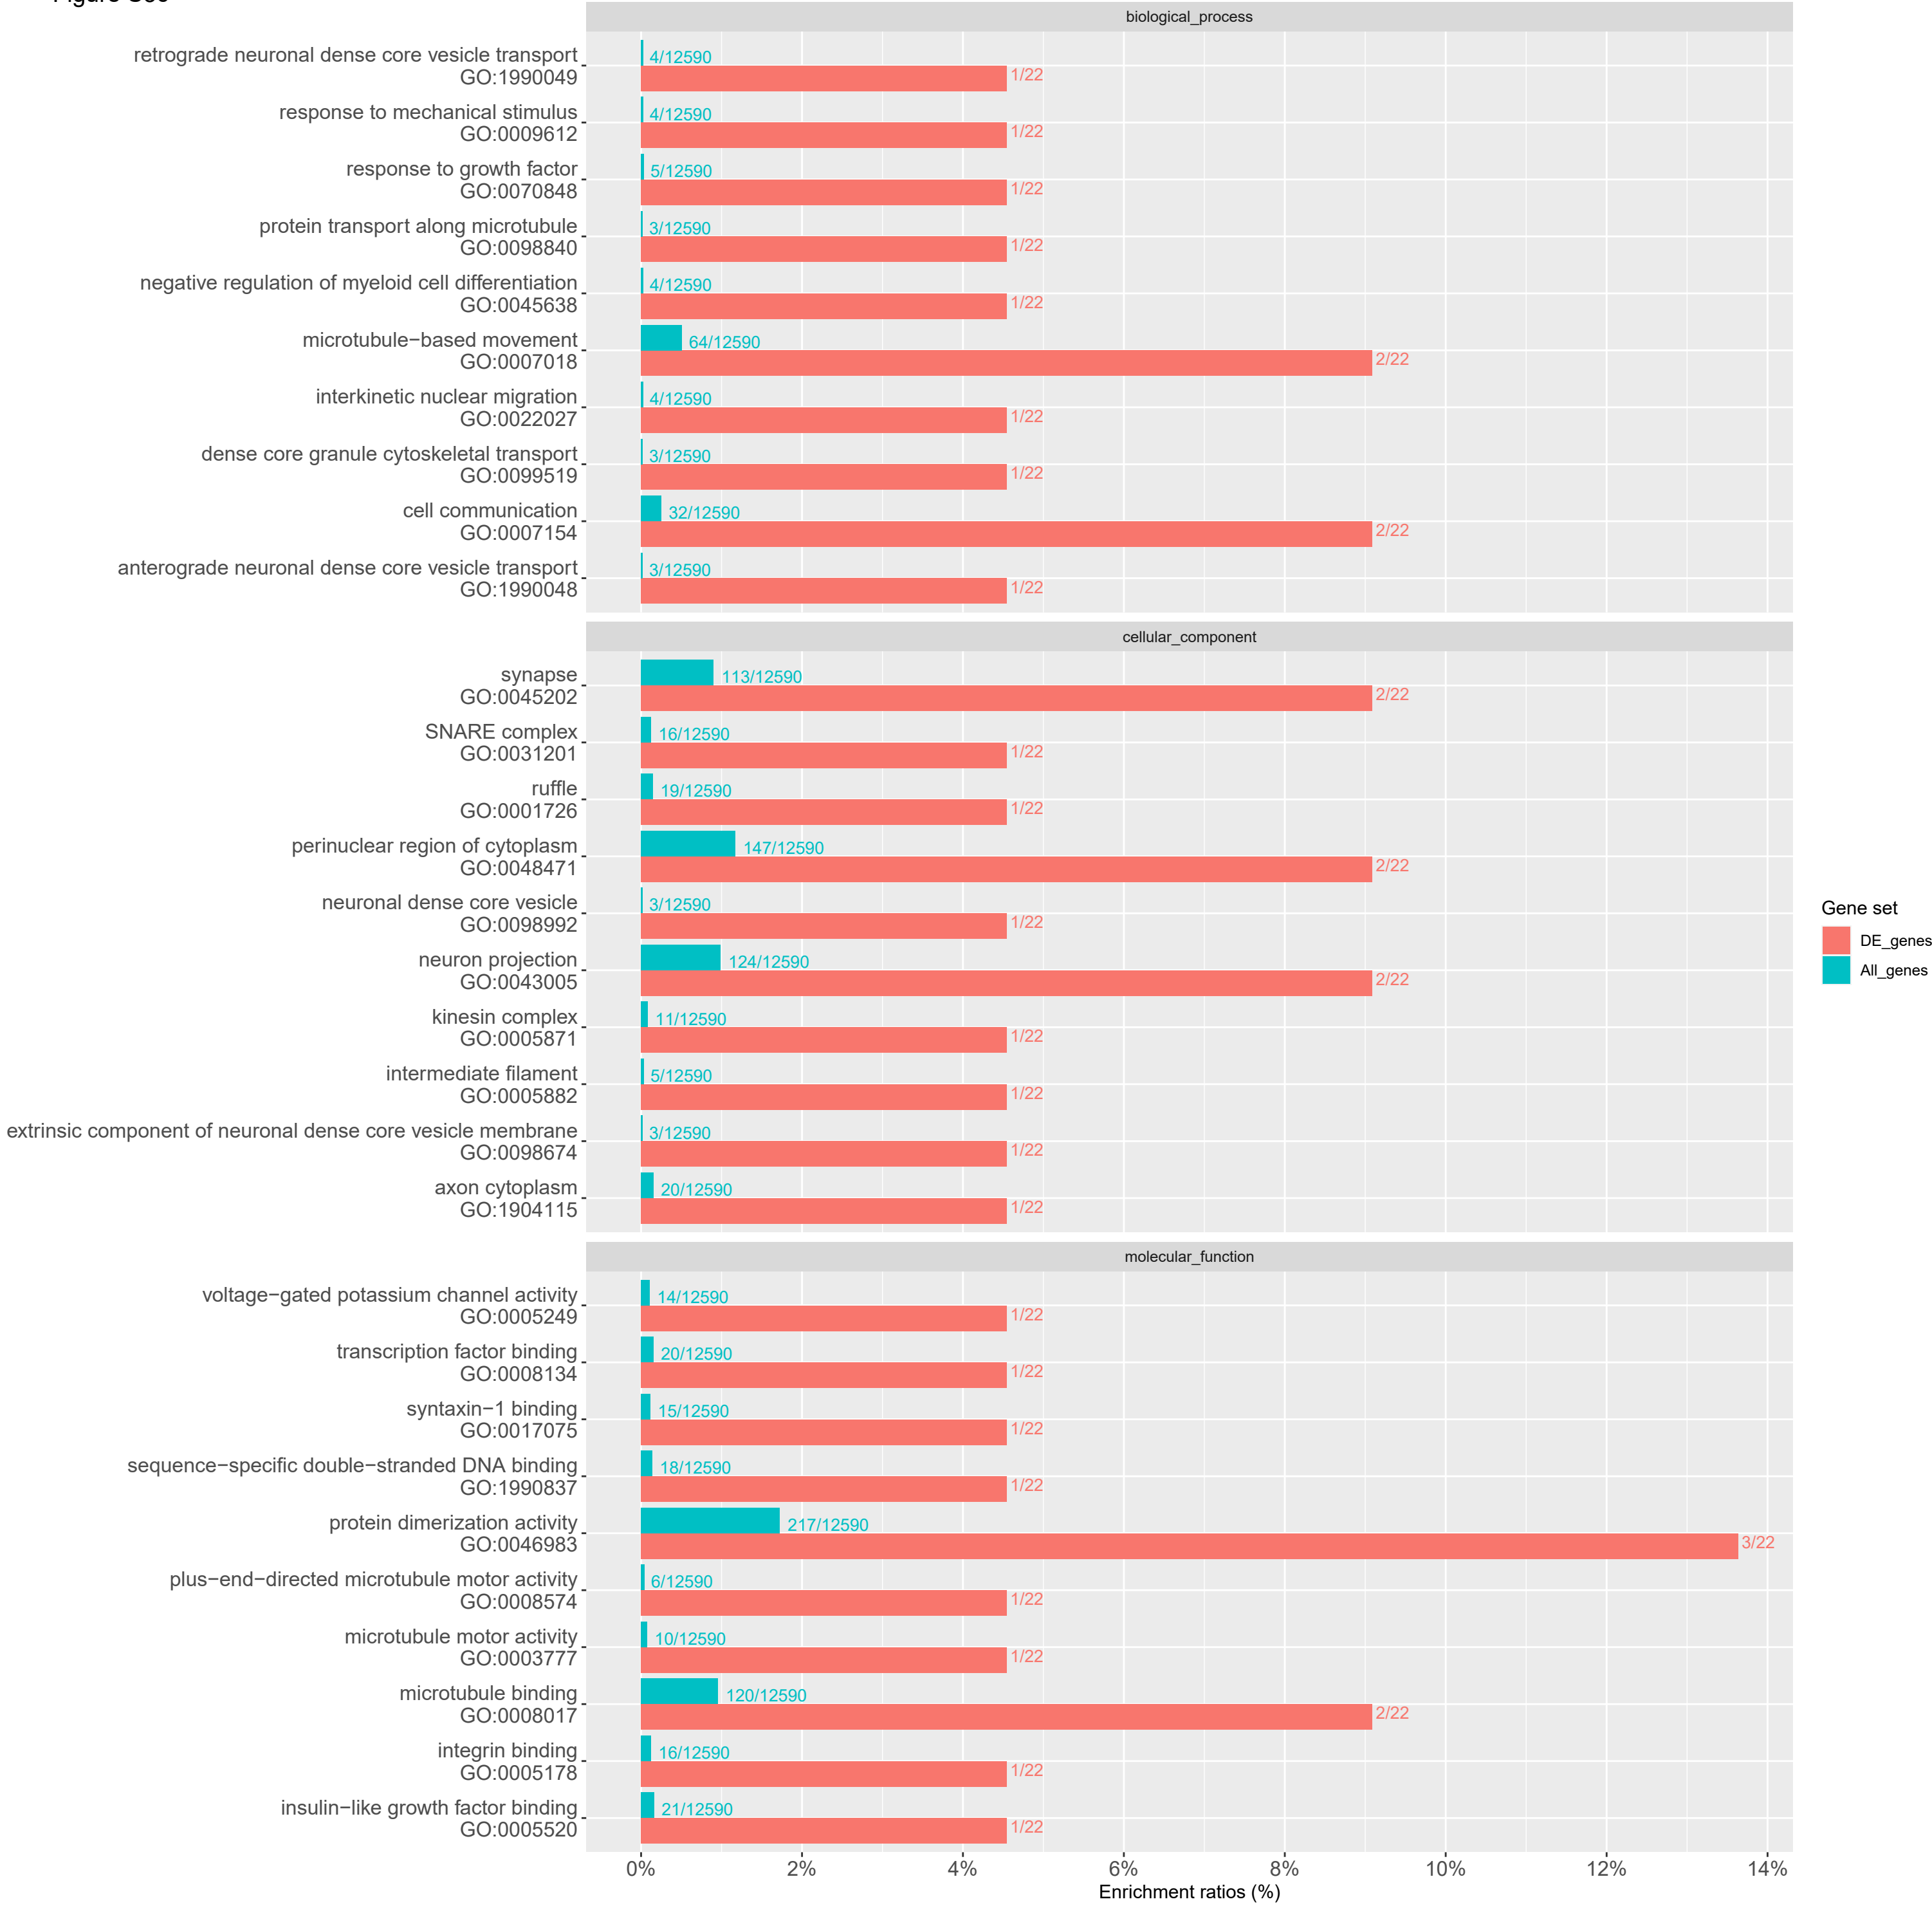

Figure S4a

GO terms classification

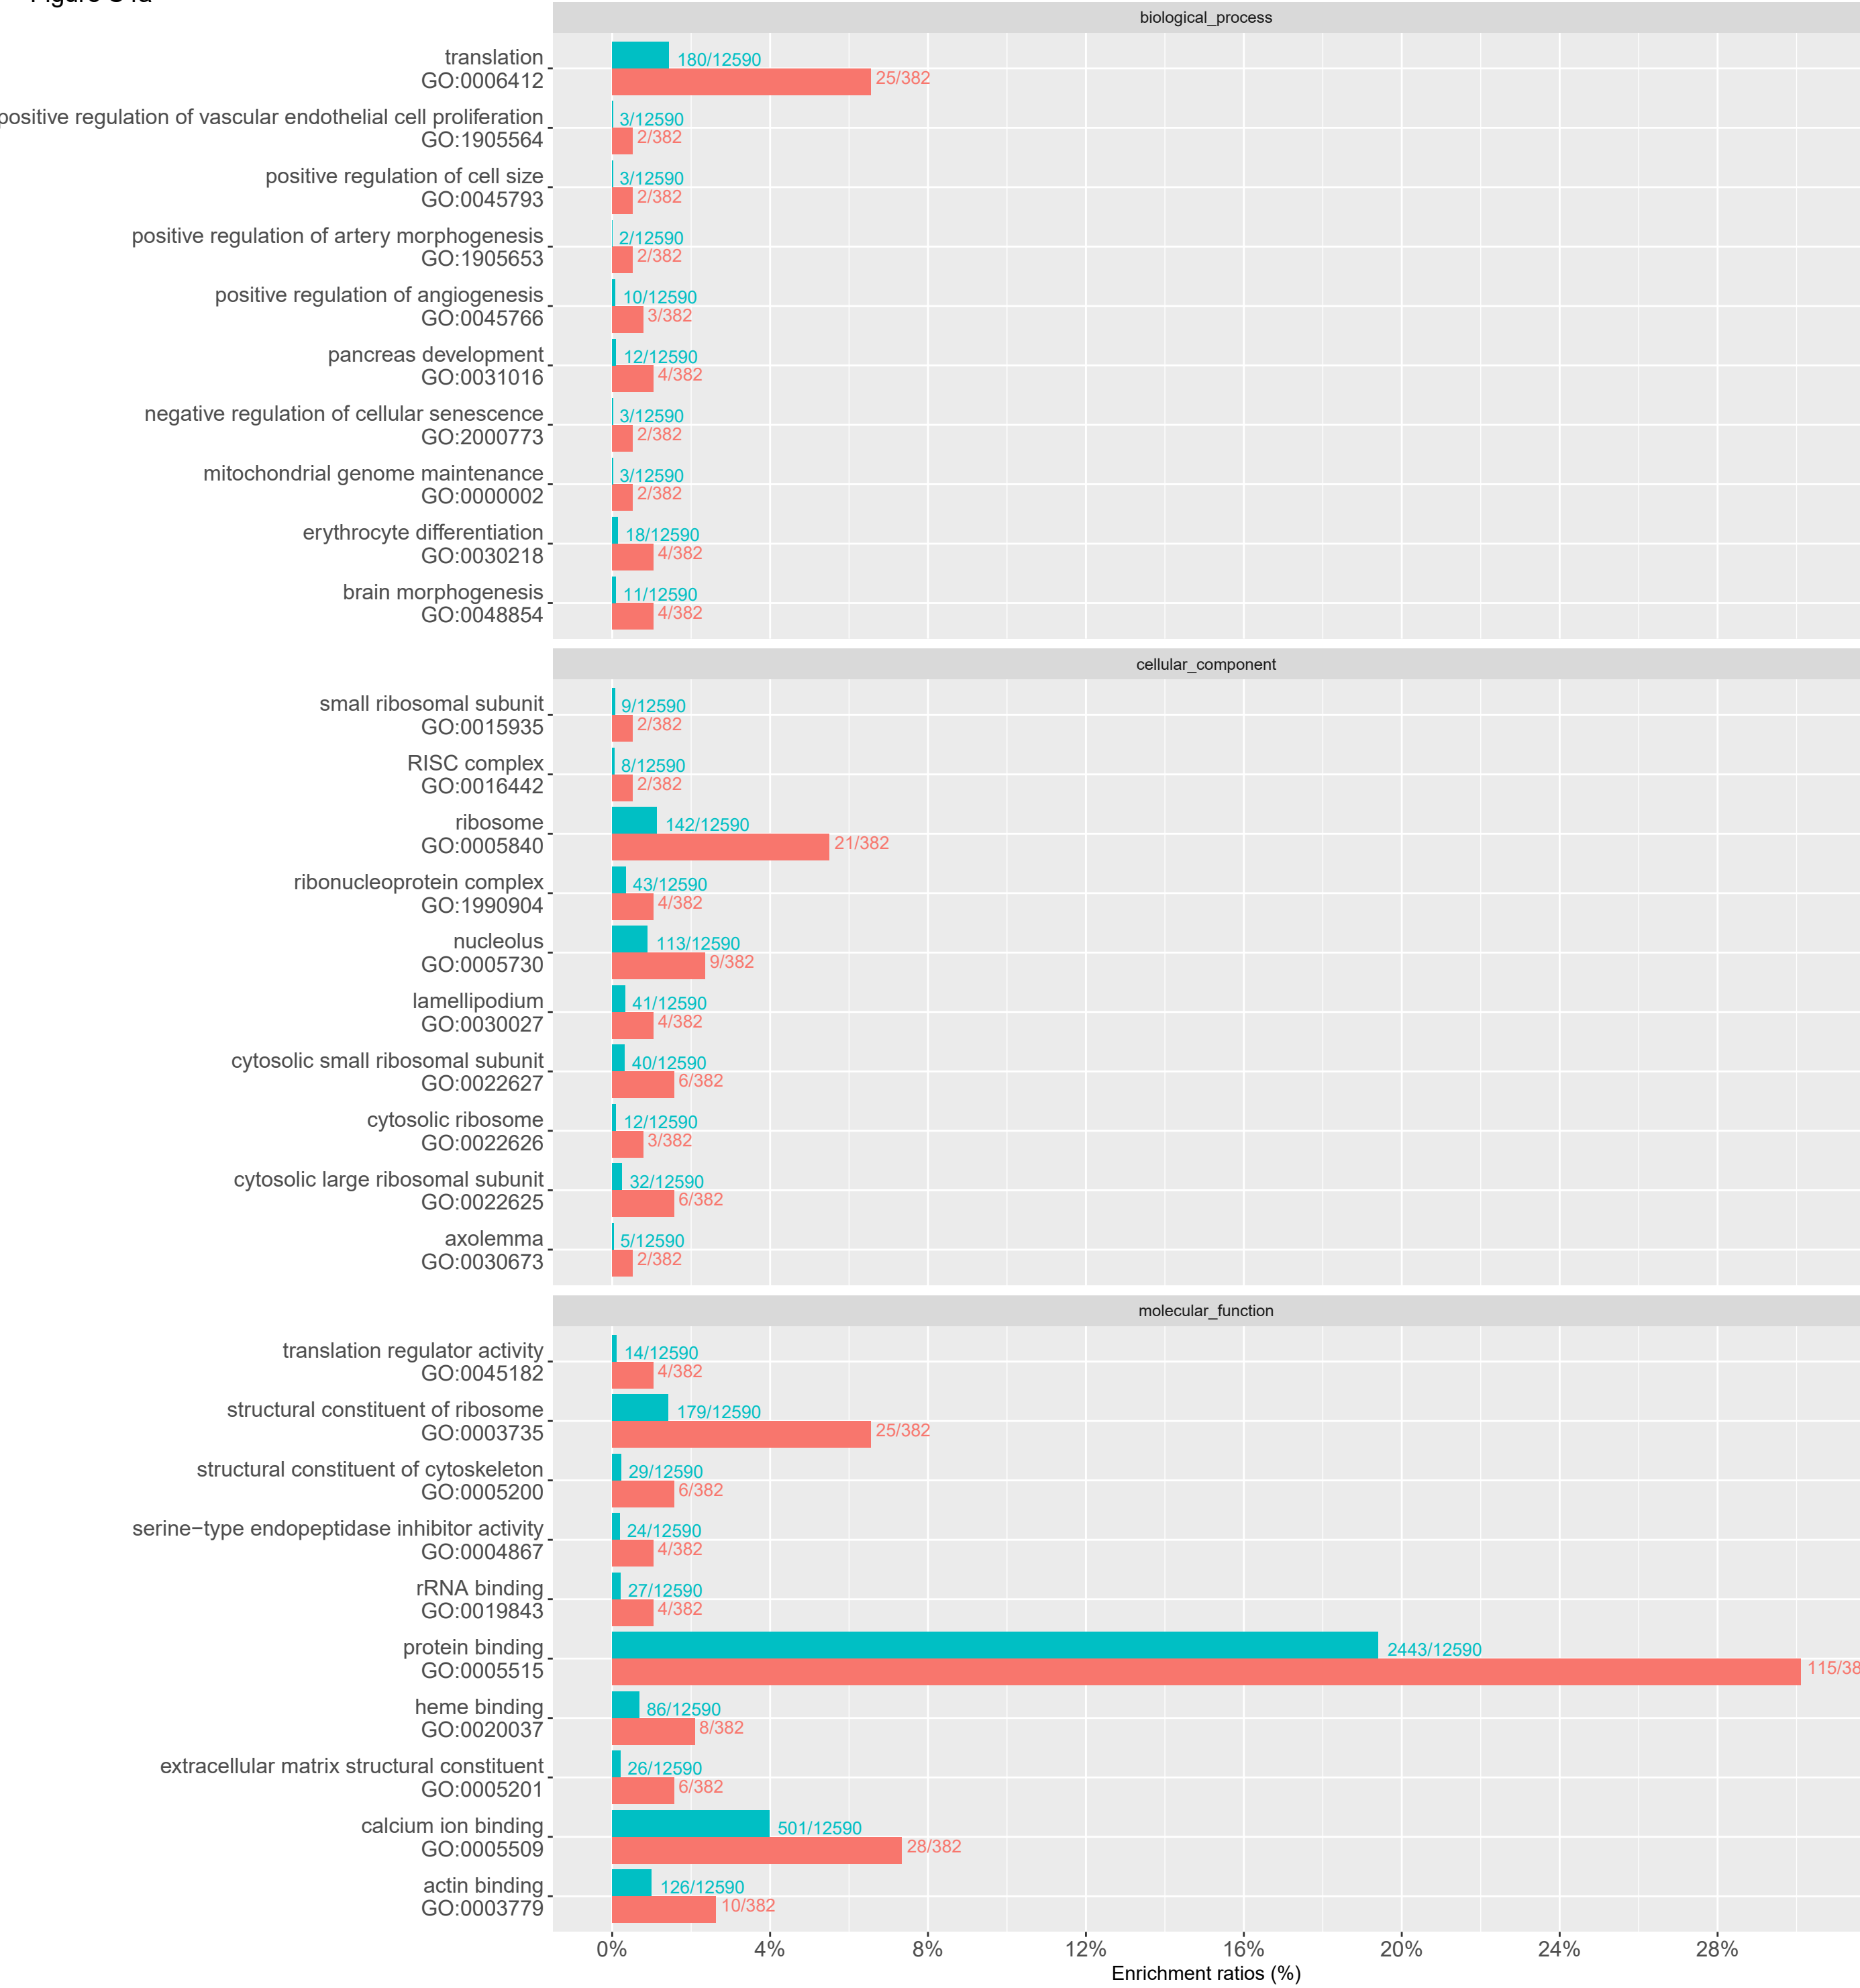

Figure S4b

maturation of SSU-rRNA from tricistronic rRNA transcript (SSU-rRNA, 5.8S rRNA, LSU-rRNA)

GO terms classification

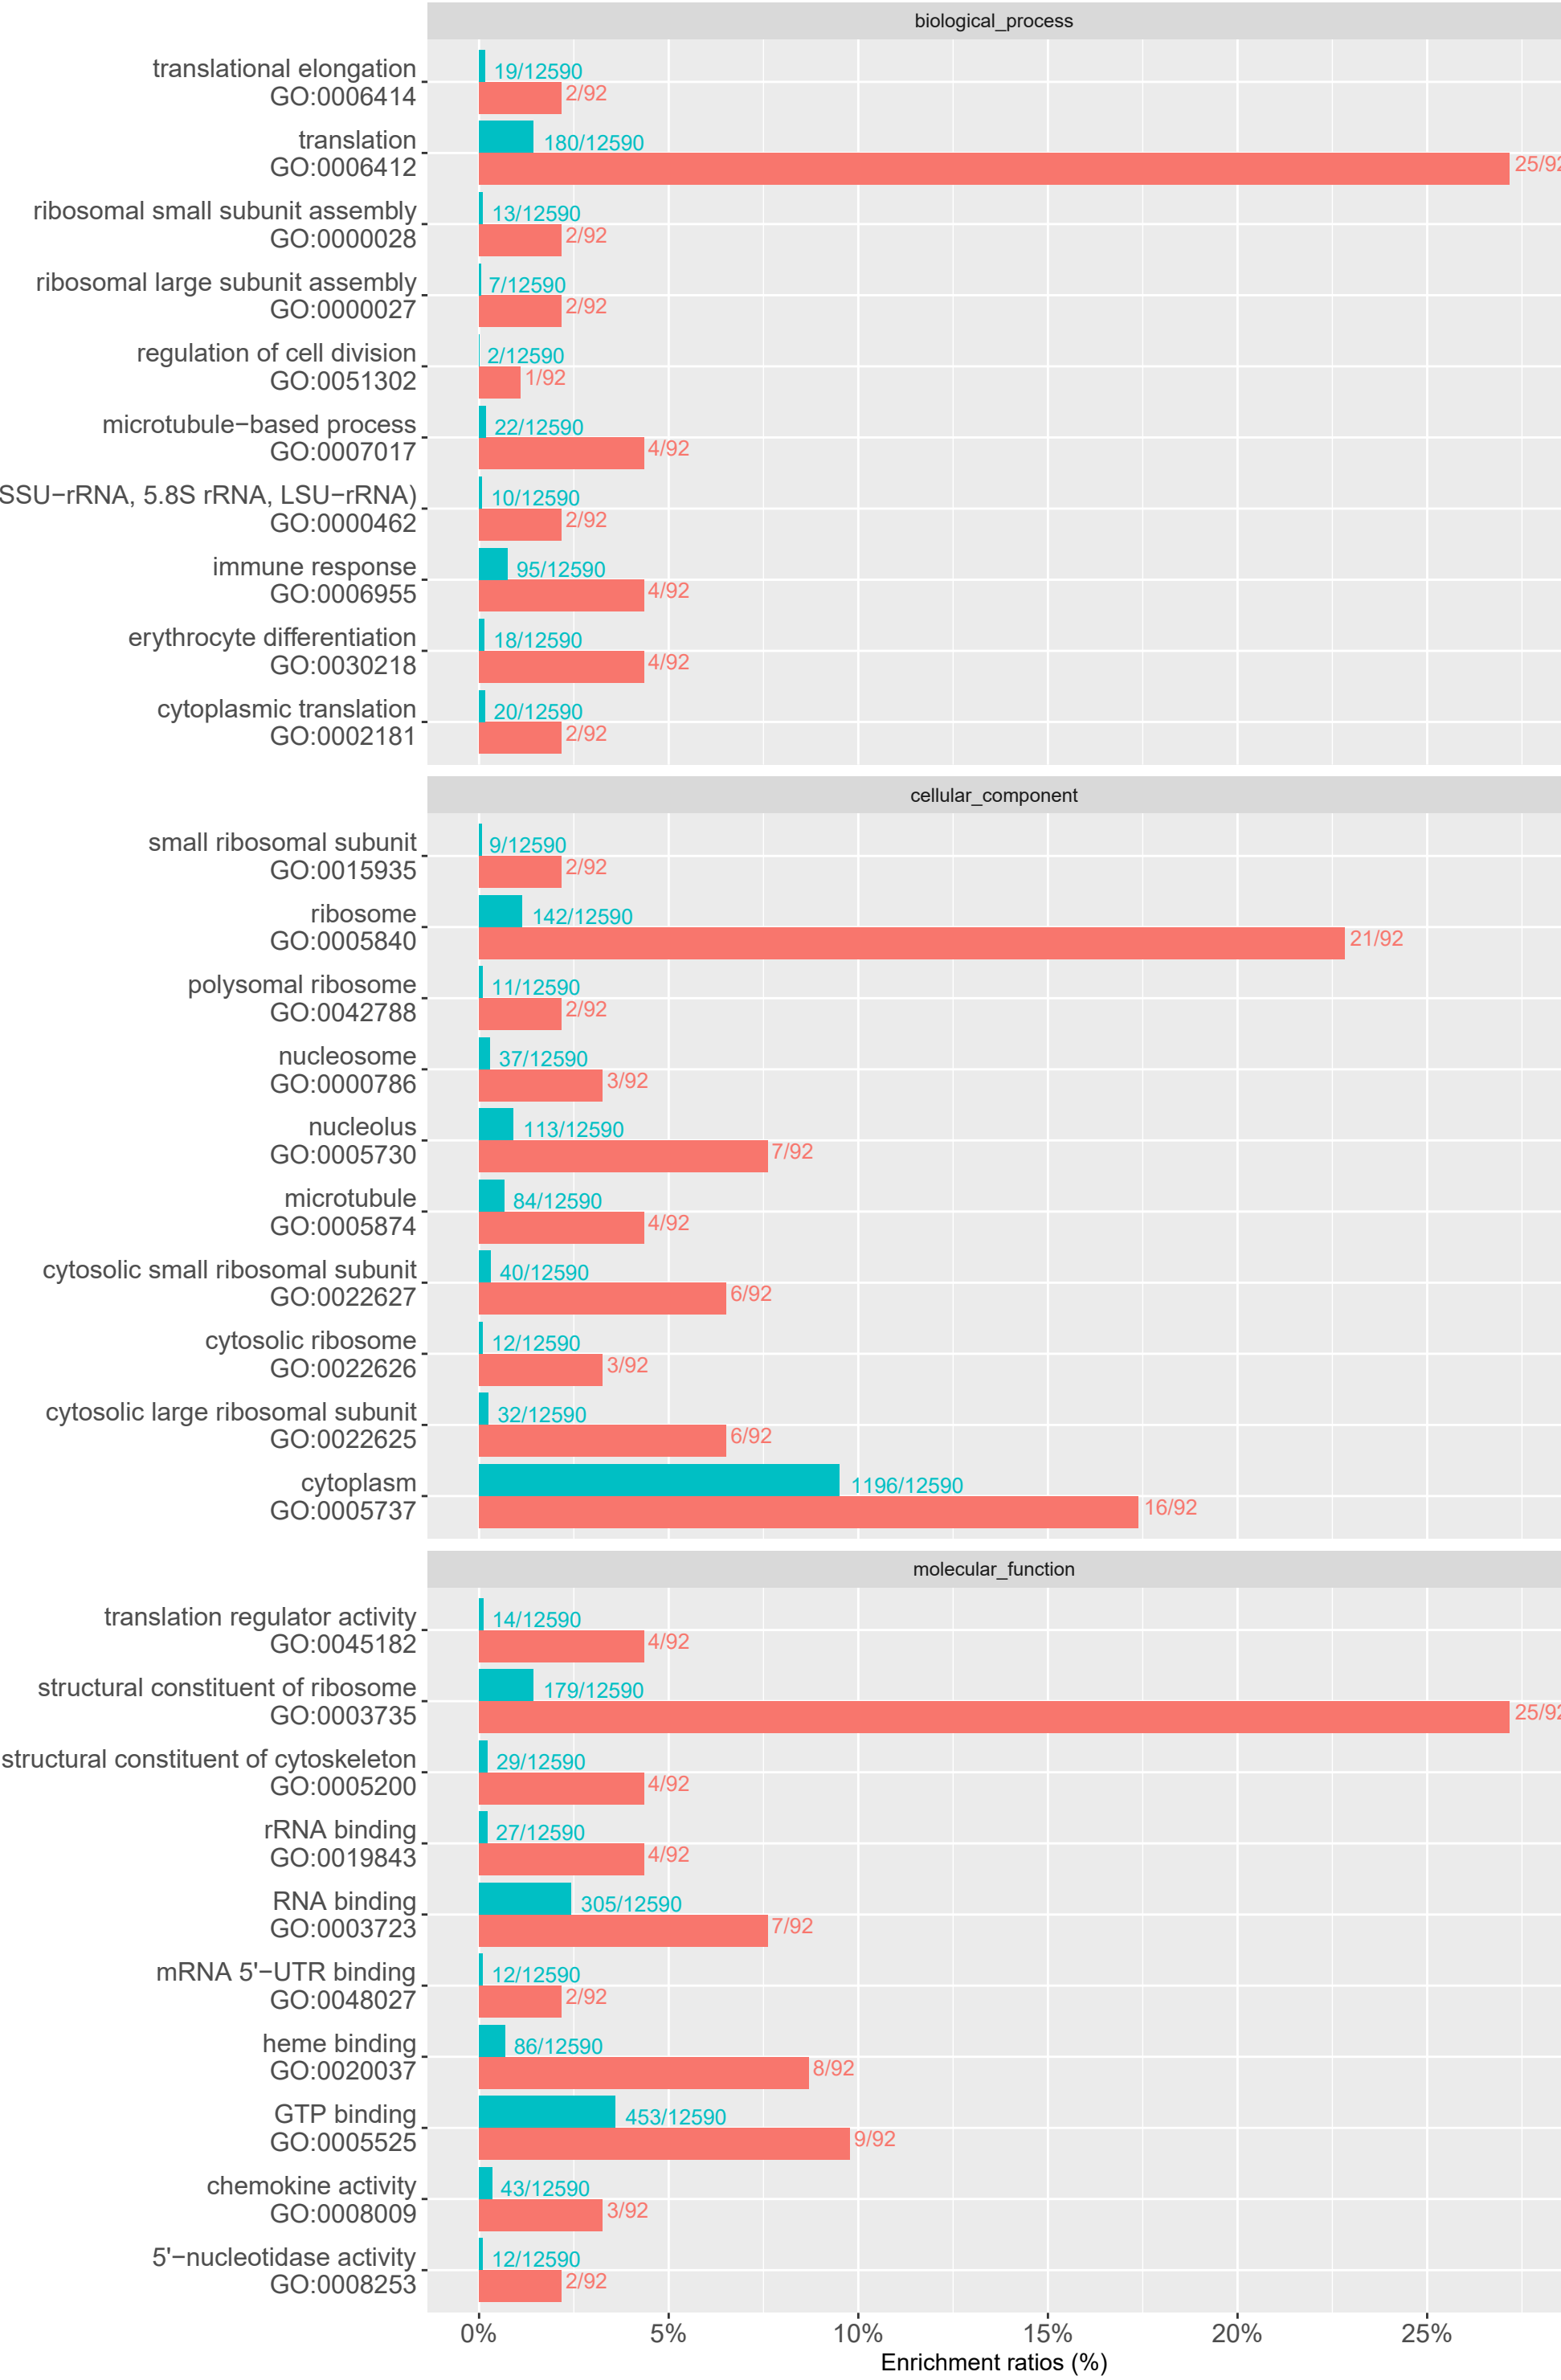

Figure S4c

GO terms classification

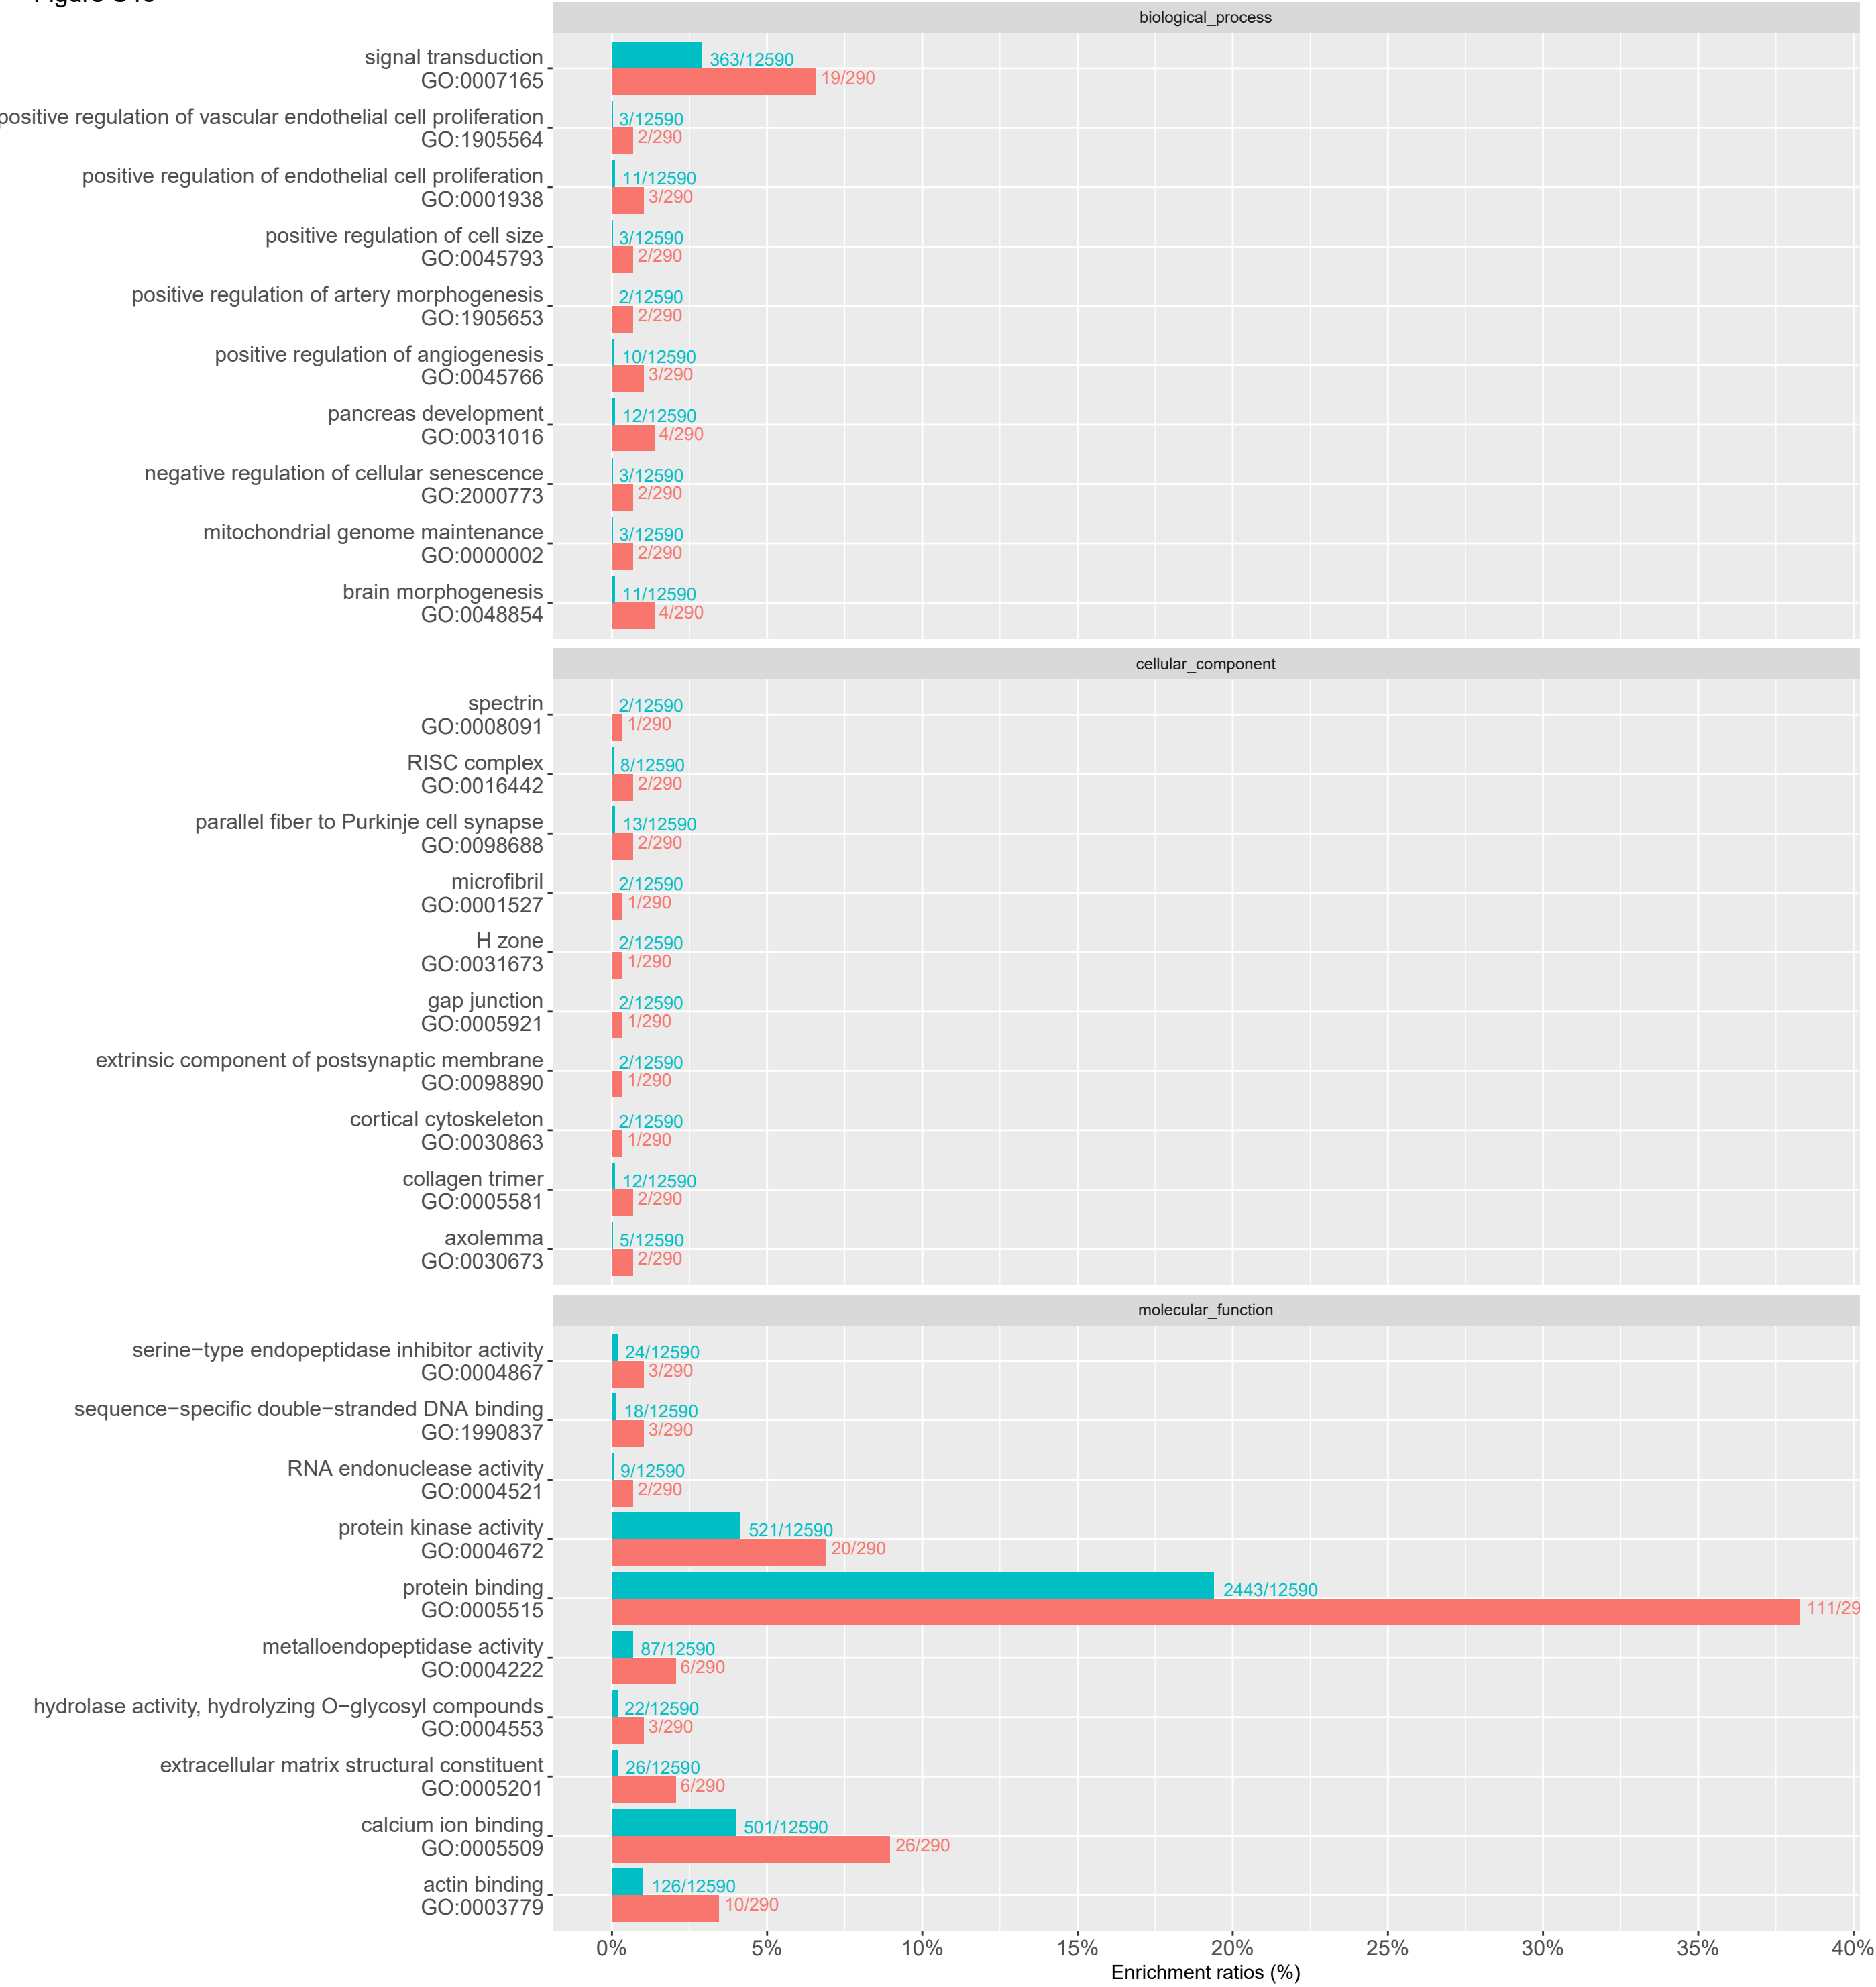

Figure S5a

GO terms classification

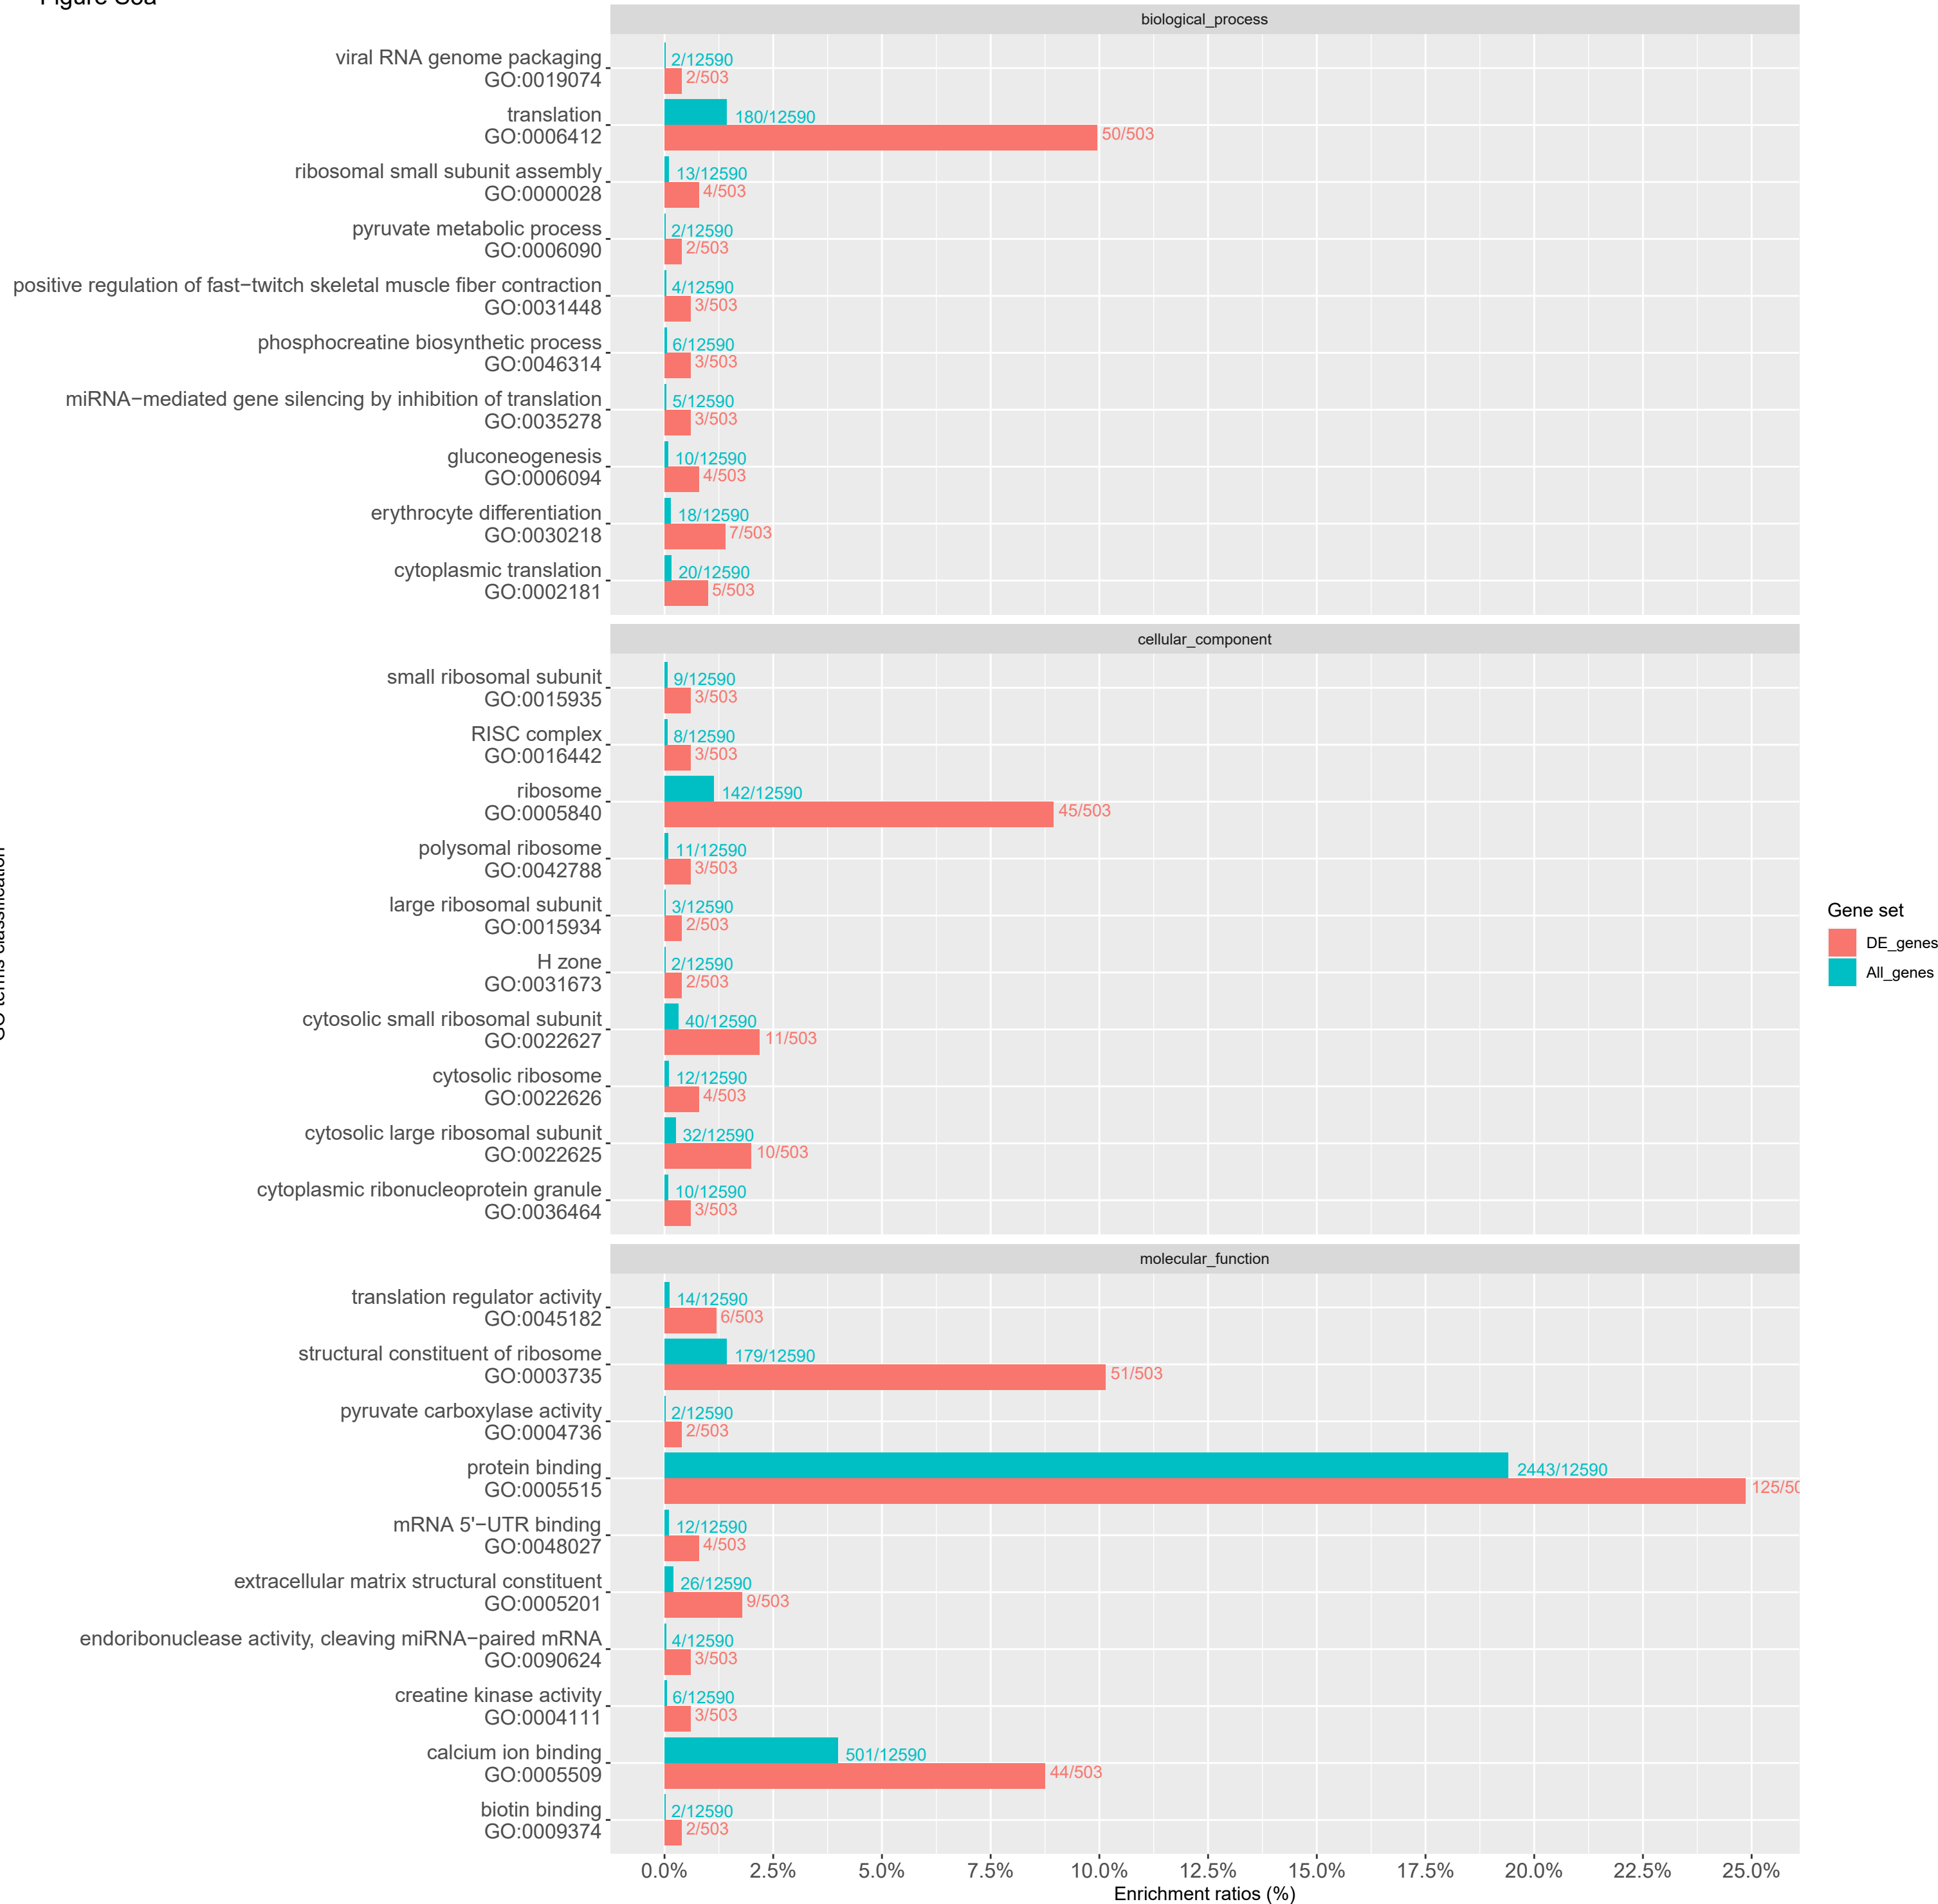

Figure S5b

GO terms classification

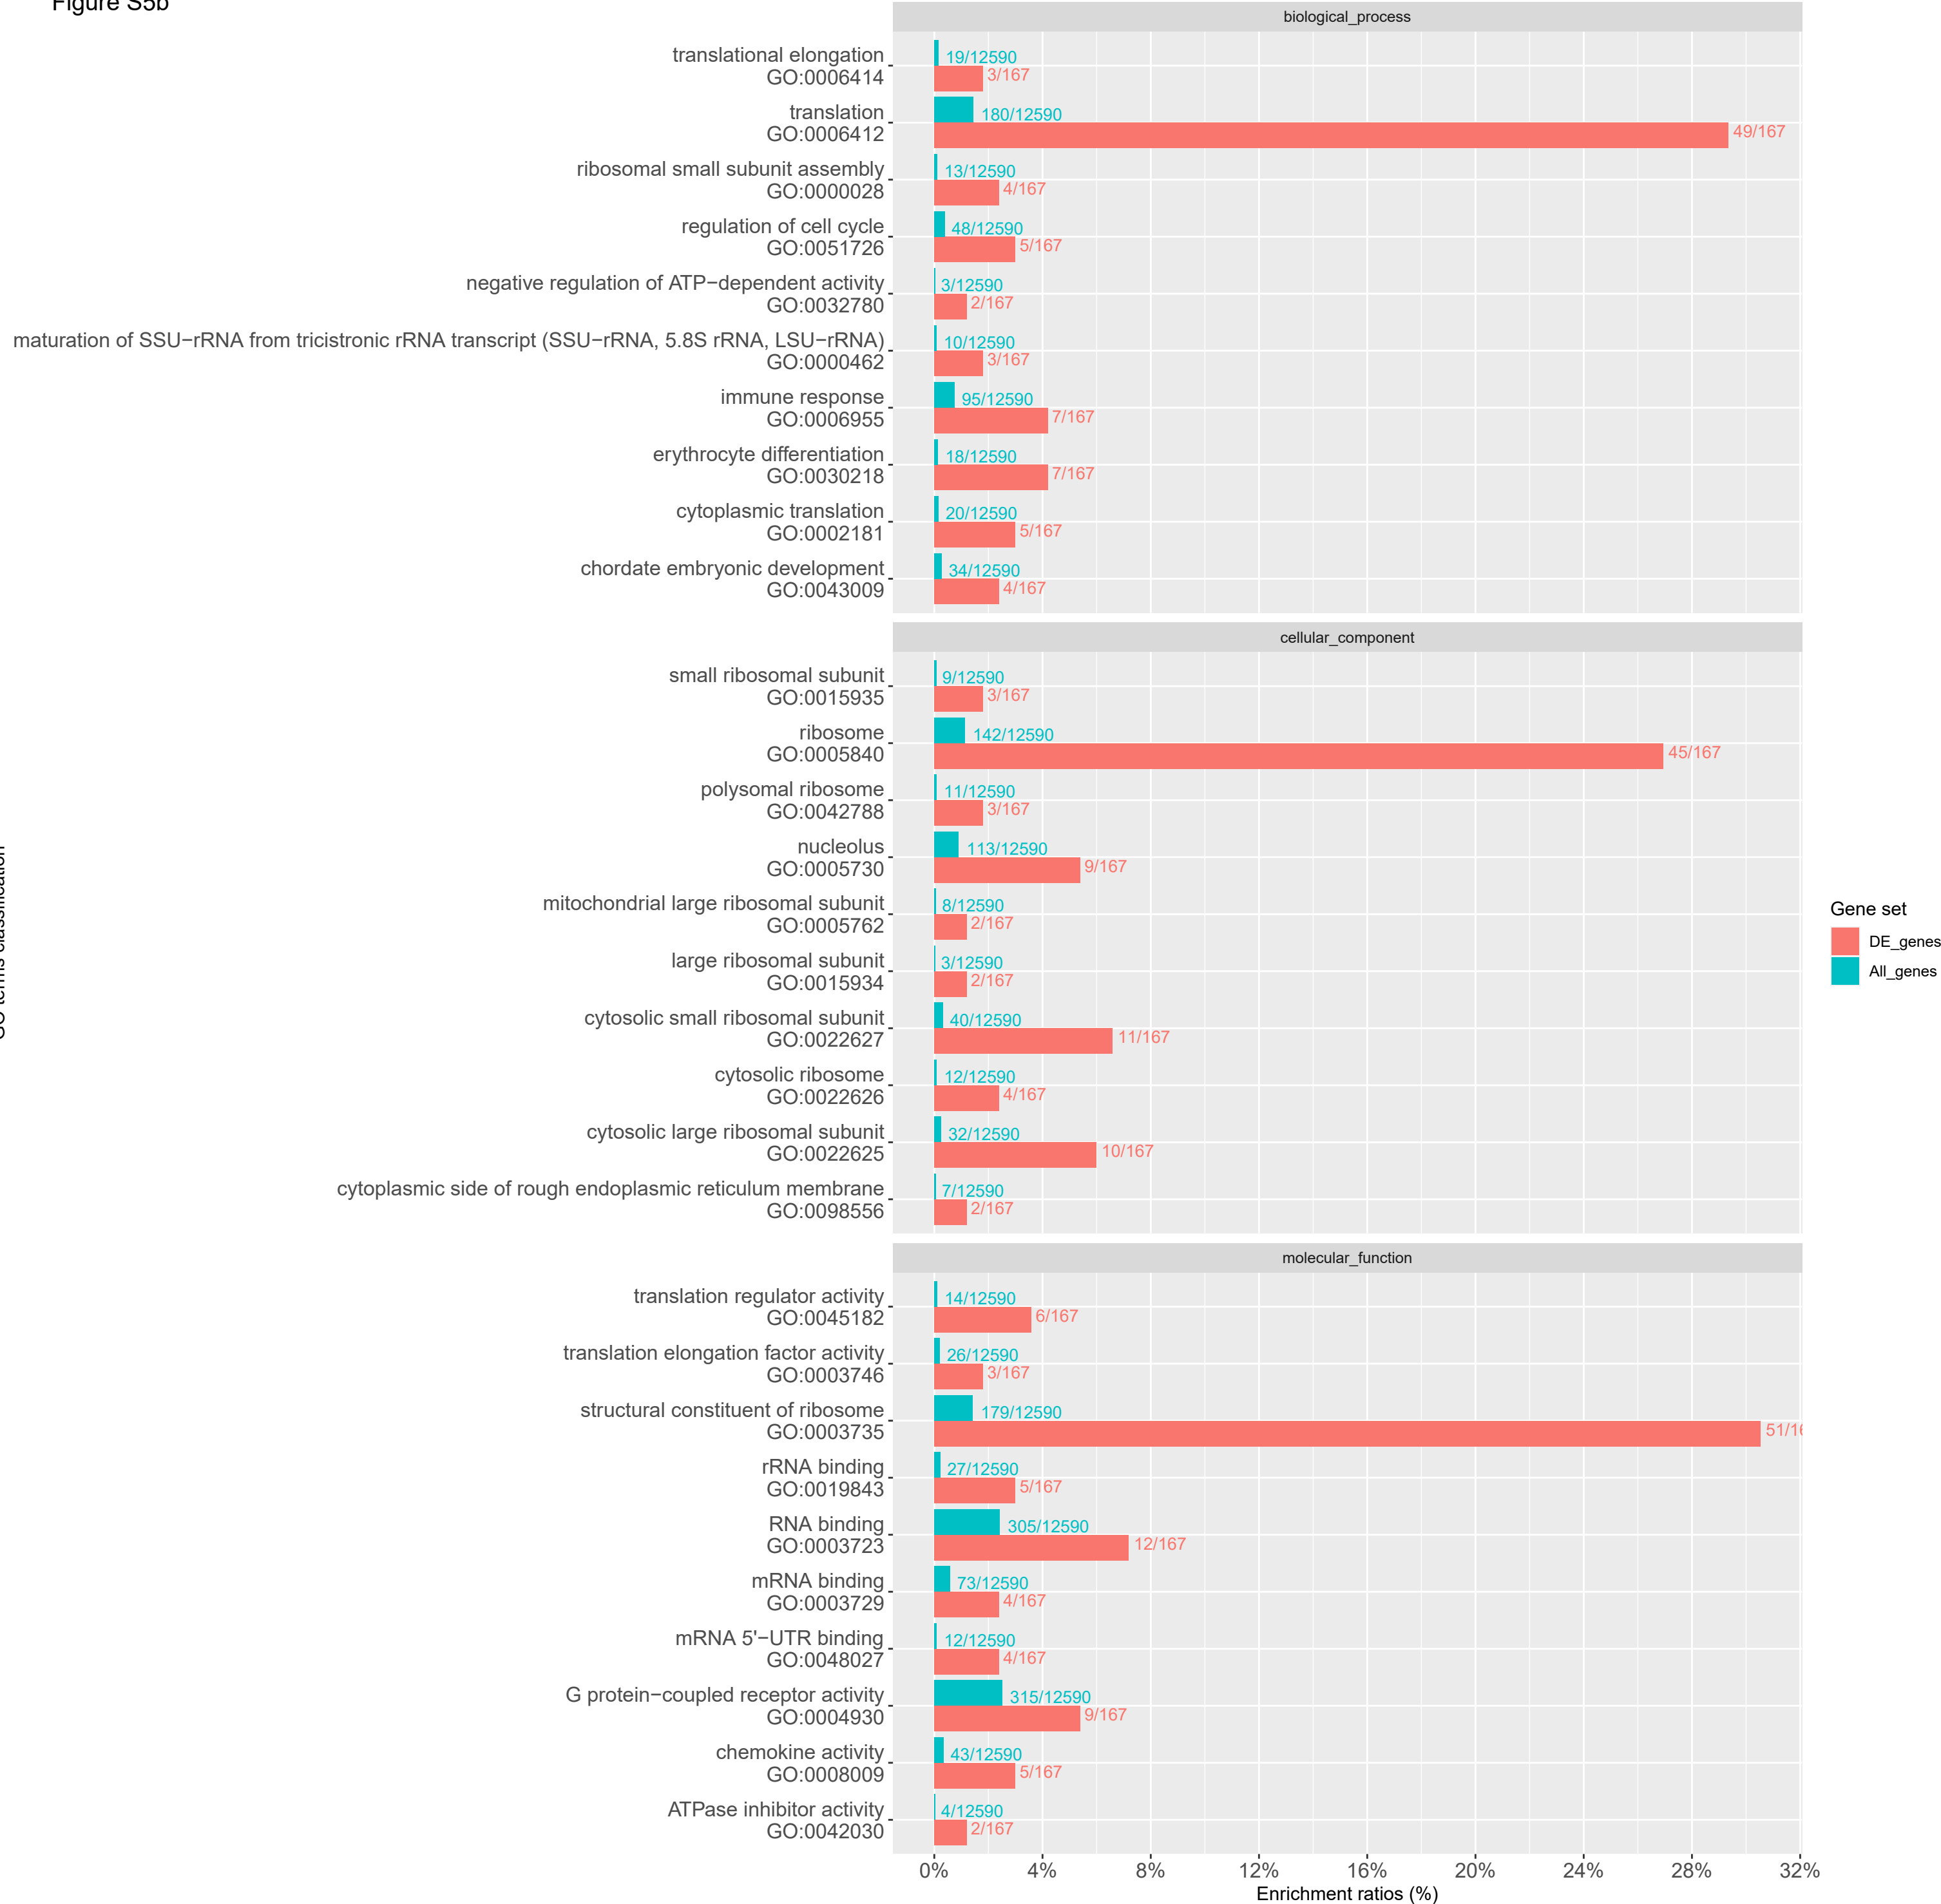

Figure S5c

GO terms classification

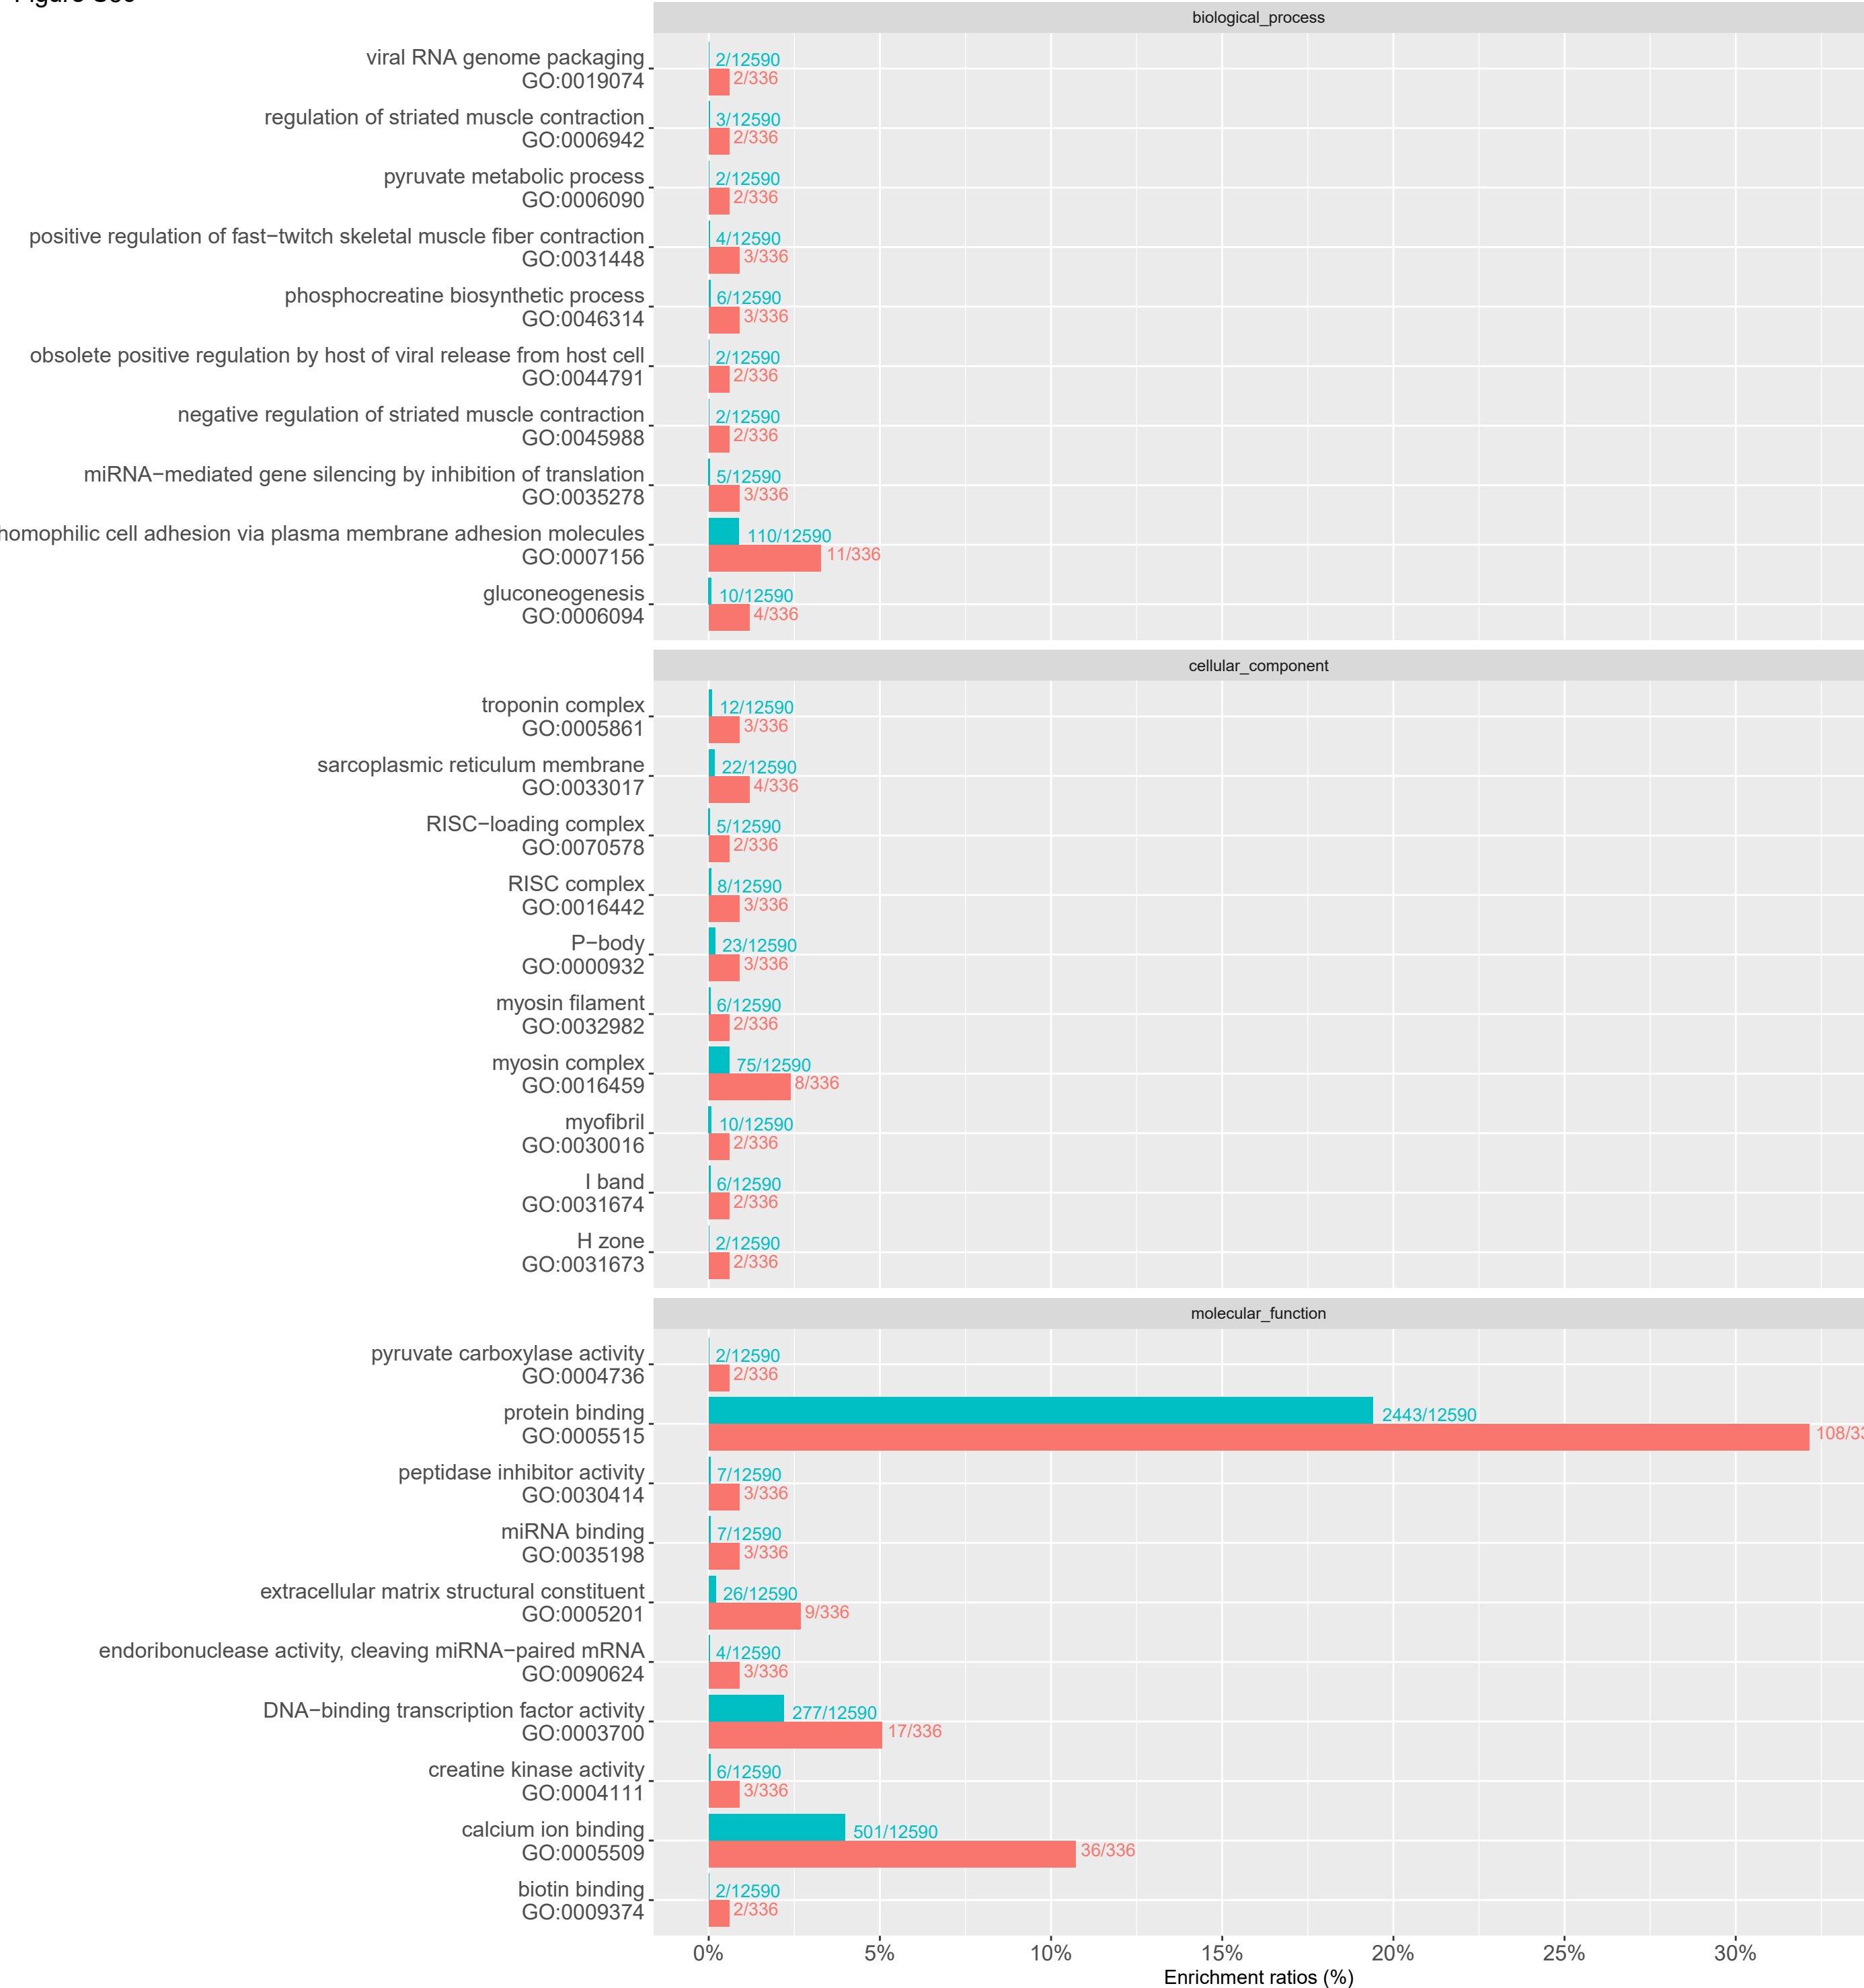

## Supplementary material

### File S1: RNA-seq data primary analysis details

A quality check of raw paired-end fastq reads was carried out by FastQC, and a contamination check against human (GRCh38), mouse (GRCm38), yeast (*S. cerevisiae* R64-1-1), *E. coli* BL21(DE3) and other organisms by BioBloom tools.

The quality and Illumina adapter trimming of raw reads was performed using Trimmomatic v0.39 (options: PE CROP:250 LEADING:3 TRAILING:3 SLIDINGWINDOW:4:5 ILLUMINACLIP:adapters.fa:2:30:10:3:true MINLEN:35).

Trimmed reads were aligned to the reference transcriptome using STAR v2.7.3a with options: --runMode alignReads --sjdbOverhang 100 --outFilterMultimapNmax 20 --alignSJoverhangMin 8 --alignSJDBoverhangMin 1 --outFilterMismatchNmax 999 --outFilterMismatchNoverReadLmax 1.0 --outFilterMismatchNoverLmax 0.1 --alignIntronMin 20 --alignIntronMax 1000000 --alignMatesGapMax 1000000 --outFilterMatchNmin 0 --outFilterScoreMinOverLread 0.66 --outFilterMatchNminOverLread 0.66 --outSAMheaderHD @HD VN:1.4 SO:coordinate --peOverlapMMp 0.1 --chimOutJunctionFormat 1 --chimSegmentMin 12 --chimJunctionOverhangMin 12 --chimOutType Junctions SeparateSAMold --outSAMunmapped Within --outFilterType BySJout --outSAMattributes All --quantMode GeneCounts TranscriptomeSAM --sjdbScore 1 --twopassMode Basic --outMultimapperOrder Random --outSAMtype BAM SortedByCoordinate

The mapped reads were deduplicated by Picard's MarkDuplicates v2.27.1 with options: - REMOVE\_DUPLICATES False -ASSUME\_SORTED true -PROGRAM\_RECORD\_ID null - VALIDATION\_STRINGENCY LENIENT

The quantification of gene expression was performed by Subread's featureCounts v1.6.4 with options: -t exon -g gene\_id -p -P -C -s 0 -T 10 -F GTF -Q 0 -d 1 -D 25000

**Table S1: The results of the alignment to *Cyprinus carpio* genome**

Number of reads per sample categorized right after the alignment. The amount of reads overlapping genes ranges from 23.69% to 27.54%, with 26.12% as the average.

| Category       | Overlapping Genes | Overlapping Genes (%) | No Feature | Ambiguous Features | Multimapping | Unmapped | Total    |
|----------------|-------------------|-----------------------|------------|--------------------|--------------|----------|----------|
| K_AB_rep1      | 3630742           | 25.95                 | 533900     | 306115             | 1714729      | 7805011  | 13990497 |
| K_AB_rep2      | 3043134           | 26.14                 | 422677     | 238237             | 1402555      | 6535603  | 11642206 |
| K_AB_rep3      | 3452960           | 25.54                 | 456671     | 275394             | 1639246      | 7692976  | 13517247 |
| K_AB_rep4      | 3810051           | 25.01                 | 581413     | 281300             | 1793953      | 8765369  | 15232086 |
| K_AB_rep5      | 3134729           | 26.14                 | 440285     | 255483             | 1489006      | 6674801  | 11994304 |
| K_BK_AB_rep1   | 3635583           | 25.56                 | 551249     | 272857             | 1690170      | 8072263  | 14222122 |
| K_BK_AB_rep2   | 3716263           | 25.43                 | 561404     | 294690             | 1855488      | 8187154  | 14614999 |
| K_BK_AB_rep3   | 3145382           | 23.69                 | 500342     | 247010             | 1516138      | 7869292  | 13278164 |
| K_BK_AB_rep4   | 3297972           | 24.83                 | 550851     | 247992             | 1522023      | 7665552  | 13284390 |
| K_BK_AB_rep5   | 3337701           | 26.04                 | 418814     | 271747             | 1686293      | 7104532  | 12819087 |
| K_BK_RR_rep1   | 4385599           | 27.09                 | 523804     | 329587             | 2044963      | 8907220  | 16191173 |
| K_BK_RR_rep2   | 3515665           | 27.23                 | 449765     | 253996             | 1584764      | 7105764  | 12909954 |
| K_BK_RR_rep3   | 3664553           | 26.03                 | 519957     | 271031             | 1765637      | 7858668  | 14079846 |
| K_BK_RR_rep4   | 3089336           | 26.62                 | 360546     | 237770             | 1427951      | 6488558  | 11604161 |
| K_BK_RR_rep5   | 3949860           | 27.04                 | 551801     | 279336             | 1777960      | 8049053  | 14608010 |
| K_F1_ABRR_rep1 | 3036489           | 25.95                 | 384041     | 232631             | 1524444      | 6522648  | 11700253 |
| K_F1_ABRR_rep2 | 3094838           | 26.60                 | 371974     | 242962             | 1530329      | 6395630  | 11635733 |
| K_F1_ABRR_rep3 | 3264895           | 25.26                 | 452746     | 258122             | 1606796      | 7344013  | 12926572 |
| K_F1_ABRR_rep4 | 3710930           | 24.02                 | 690328     | 243062             | 1738396      | 9063657  | 15446373 |
| K_F1_ABRR_rep5 | 3651039           | 24.54                 | 600781     | 253082             | 1697621      | 8676905  | 14879428 |
| K_RR_rep1      | 4025318           | 26.71                 | 483328     | 297503             | 1960433      | 8304226  | 15070808 |
| K_RR_rep3      | 3408449           | 25.00                 | 500522     | 237293             | 1546298      | 7939958  | 13632520 |
| K_RR_rep4      | 4147983           | 26.81                 | 501990     | 330527             | 2004806      | 8487899  | 15473205 |
| K_RR_rep5      | 3121290           | 27.47                 | 360858     | 240776             | 1456454      | 6184263  | 11363641 |
| OK_AB_rep1     | 3725697           | 26.98                 | 458845     | 303617             | 1770272      | 7552752  | 13811183 |
| OK_AB_rep2     | 3191201           | 25.85                 | 399682     | 249454             | 1526670      | 6976418  | 12343425 |
| OK_AB_rep3     | 3525349           | 27.09                 | 408170     | 281184             | 1681964      | 7115959  | 13012626 |
| OK_AB_rep4     | 3195724           | 25.21                 | 400117     | 220567             | 1435409      | 7422906  | 12674723 |
| OK_AB_rep5     | 3194009           | 26.12                 | 406686     | 243843             | 1535177      | 6846655  | 12226370 |

|                 |         |       |        |        |         |         |          |
|-----------------|---------|-------|--------|--------|---------|---------|----------|
| OK_BK_AB_rep1   | 3492896 | 26.52 | 436931 | 252087 | 1559707 | 7429400 | 13171021 |
| OK_BK_AB_rep2   | 3308444 | 27.01 | 415792 | 258006 | 1549048 | 6718342 | 12249632 |
| OK_BK_AB_rep3   | 3430499 | 27.24 | 412780 | 291188 | 1852807 | 6605557 | 12592831 |
| OK_BK_AB_rep4   | 3345079 | 26.33 | 437439 | 256330 | 1569425 | 7097906 | 12706179 |
| OK_BK_AB_rep5   | 3364282 | 27.04 | 435376 | 265243 | 1610469 | 6766073 | 12441443 |
| OK_BK_RR_rep1   | 3392363 | 25.28 | 382605 | 266571 | 1625572 | 7754650 | 13421761 |
| OK_BK_RR_rep2   | 3559744 | 27.54 | 435727 | 291859 | 1723350 | 6916951 | 12927631 |
| OK_BK_RR_rep3   | 3369884 | 26.48 | 472846 | 229481 | 1495847 | 7159729 | 12727787 |
| OK_BK_RR_rep5   | 2939879 | 25.53 | 398358 | 221613 | 1418468 | 6534857 | 11513175 |
| OK_F1_ABRR_rep1 | 2017541 | 25.92 | 232801 | 168482 | 1001309 | 4362396 | 7782529  |
| OK_F1_ABRR_rep3 | 2925433 | 26.12 | 335952 | 234174 | 1452050 | 6251745 | 11199354 |
| OK_F1_ABRR_rep4 | 2921465 | 25.91 | 356132 | 218383 | 1374372 | 6405219 | 11275571 |
| OK_F1_ABRR_rep5 | 3570497 | 25.71 | 481380 | 265330 | 1615345 | 7952644 | 13885196 |
| OK_RR_rep1      | 2999324 | 26.35 | 343987 | 253084 | 1496887 | 6287882 | 11381164 |
| OK_RR_rep3      | 3576259 | 27.12 | 416828 | 303130 | 1769300 | 7121811 | 13187328 |
| OK_RR_rep4      | 3743058 | 27.27 | 468135 | 275167 | 1692894 | 7547508 | 13726762 |
| OK_RR_rep5      | 3515604 | 26.13 | 471657 | 258683 | 1629535 | 7577361 | 13452840 |

**Table S2: The results of the alignment to *Carassius auratus* genome**

Number of reads per sample categorized right after the alignment. The amount of reads overlapping genes ranges from 29.98% to 40.46%, with 35.2% as the average.

| Category       | Overlapping Genes | Overlapping Genes (%) | No Feature | Ambiguous Features | Multimapping | Unmapped | Total    |
|----------------|-------------------|-----------------------|------------|--------------------|--------------|----------|----------|
| K_AB_rep1      | 4824460           | 34.48                 | 278059     | 131150             | 1225709      | 7531117  | 13990495 |
| K_AB_rep2      | 4038761           | 34.69                 | 205557     | 117097             | 1003298      | 6277488  | 11642201 |
| K_AB_rep3      | 4596836           | 34.01                 | 236437     | 134856             | 1151567      | 7397552  | 13517248 |
| K_AB_rep4      | 5023207           | 32.98                 | 308225     | 139503             | 1308552      | 8452594  | 15232081 |
| K_AB_rep5      | 4182012           | 34.87                 | 219554     | 114629             | 1055381      | 6422728  | 11994304 |
| K_BK_AB_rep1   | 4649613           | 32.69                 | 287885     | 128758             | 1316429      | 7839436  | 14222121 |
| K_BK_AB_rep2   | 4758723           | 32.56                 | 333882     | 121839             | 1402273      | 7998282  | 14614999 |
| K_BK_AB_rep3   | 3981304           | 29.98                 | 325855     | 161493             | 1230516      | 7578995  | 13278163 |
| K_BK_AB_rep4   | 4181180           | 31.47                 | 330483     | 124227             | 1219881      | 7428621  | 13284392 |
| K_BK_AB_rep5   | 4628861           | 36.11                 | 199868     | 120196             | 1082518      | 6787643  | 12819086 |
| K_BK_RR_rep1   | 5813417           | 35.90                 | 303328     | 174479             | 1449639      | 8450309  | 16191172 |
| K_BK_RR_rep2   | 4586315           | 35.53                 | 262473     | 140388             | 1145409      | 6775366  | 12909951 |
| K_BK_RR_rep3   | 4871138           | 34.60                 | 284550     | 132641             | 1286844      | 7504676  | 14079849 |
| K_BK_RR_rep4   | 4130405           | 35.59                 | 188442     | 122563             | 1000019      | 6162728  | 11604157 |
| K_BK_RR_rep5   | 5124146           | 35.08                 | 301654     | 148586             | 1367042      | 7666582  | 14608010 |
| K_F1_ABRR_rep1 | 4198931           | 35.89                 | 213548     | 117021             | 971920       | 6198833  | 11700253 |
| K_F1_ABRR_rep2 | 4265436           | 36.66                 | 198099     | 121581             | 995296       | 6055319  | 11635731 |
| K_F1_ABRR_rep3 | 4396630           | 34.01                 | 253067     | 116554             | 1111795      | 7048524  | 12926570 |
| K_F1_ABRR_rep4 | 4640735           | 30.04                 | 421693     | 131300             | 1410939      | 8841706  | 15446373 |
| K_F1_ABRR_rep5 | 4666873           | 31.36                 | 348310     | 126273             | 1294581      | 8443390  | 14879427 |
| K_RR_rep1      | 5456978           | 36.21                 | 295079     | 163096             | 1341996      | 7813653  | 15070802 |
| K_RR_rep3      | 4487183           | 32.92                 | 275168     | 124421             | 1126536      | 7619208  | 13632516 |
| K_RR_rep4      | 5647556           | 36.50                 | 272335     | 144083             | 1334531      | 8074701  | 15473206 |
| K_RR_rep5      | 4222996           | 37.16                 | 185509     | 115341             | 1013631      | 5826164  | 11363641 |
| OK_AB_rep1     | 5105381           | 36.97                 | 221283     | 144395             | 1183692      | 7156429  | 13811180 |
| OK_AB_rep2     | 4350096           | 35.24                 | 189396     | 122835             | 1015522      | 6665572  | 12343421 |
| OK_AB_rep3     | 4833452           | 37.14                 | 187954     | 128010             | 1100657      | 6762550  | 13012623 |
| OK_AB_rep4     | 4224550           | 33.33                 | 178736     | 131479             | 1033269      | 7106681  | 12674715 |
| OK_AB_rep5     | 4304723           | 35.21                 | 196082     | 129397             | 1083426      | 6512741  | 12226369 |

|                 |         |       |        |        |         |         |          |
|-----------------|---------|-------|--------|--------|---------|---------|----------|
| OK_BK_AB_rep1   | 4663822 | 35.41 | 204248 | 123797 | 1093841 | 7085311 | 13171019 |
| OK_BK_AB_rep2   | 4472804 | 36.51 | 206042 | 117557 | 1034923 | 6418299 | 12249625 |
| OK_BK_AB_rep3   | 5095133 | 40.46 | 179993 | 113012 | 1066116 | 6138576 | 12592830 |
| OK_BK_AB_rep4   | 4567828 | 35.95 | 204854 | 119038 | 1049097 | 6765359 | 12706176 |
| OK_BK_AB_rep5   | 4596562 | 36.95 | 199331 | 135453 | 1105670 | 6404423 | 12441439 |
| OK_BK_RR_rep1   | 4659000 | 34.71 | 197378 | 147978 | 1094643 | 7322759 | 13421758 |
| OK_BK_RR_rep2   | 4942964 | 38.24 | 200899 | 130808 | 1098121 | 6554838 | 12927630 |
| OK_BK_RR_rep3   | 4465329 | 35.08 | 217627 | 113596 | 1129146 | 6802090 | 12727788 |
| OK_BK_RR_rep5   | 4086989 | 35.50 | 203707 | 106443 | 888519  | 6227507 | 11513165 |
| OK_F1_ABRR_rep1 | 2827108 | 36.33 | 114717 | 76653  | 635092  | 4128959 | 7782529  |
| OK_F1_ABRR_rep3 | 4103678 | 36.64 | 166263 | 125584 | 943686  | 5860140 | 11199351 |
| OK_F1_ABRR_rep4 | 4022270 | 35.67 | 169481 | 114904 | 899836  | 6069084 | 11275575 |
| OK_F1_ABRR_rep5 | 4800887 | 34.58 | 230958 | 130038 | 1111926 | 7611387 | 13885196 |
| OK_RR_rep1      | 4267011 | 37.49 | 163312 | 105362 | 948367  | 5897108 | 11381160 |
| OK_RR_rep3      | 5039456 | 38.21 | 194141 | 125498 | 1135267 | 6692961 | 13187323 |
| OK_RR_rep4      | 5011368 | 36.51 | 227043 | 135356 | 1169590 | 7183406 | 13726763 |
| OK_RR_rep5      | 4789517 | 35.60 | 218628 | 128612 | 1108200 | 7207882 | 13452839 |

## File S2: Custom rRNA database details

Following this guide <https://informatics.fas.harvard.edu/best-practices-for-de-novo-transcriptome-assembly-with-trinity.html>, to increase the mRNA transcript yield in the process of transcriptome assembly we mapped trimmed reads against our custom rRNA database consisting of following data:

- RDP database datasets (source: <https://rdp.cme.msu.edu/misc/resources.jsp>):
  - current\_Archaea\_unaligned.fa.gz
  - current\_Bacteria\_unaligned.fa.gz
  - current\_Fungi\_unaligned.fa.gz
- rrnDB - The ribosomal RNA database dataset (source: <https://rrndb.umms.med.umich.edu>):
  - rrnDB-5.7\_16S\_rRNA.fasta
- µgreen database dataset (source: <http://microgreen-23sdatabase.ea.inra.fr/>):
  - microgreen\_ncbi\_biocomPipe.fasta
- SILVA rRNA database datasets (source: <https://www.arb-silva.de/>):
  - SILVA\_138.1\_LSURef\_NR99\_tax\_silva.fasta.gz
  - SILVA\_138.1\_SSURef\_NR99\_tax\_silva.fasta.gz

**Table S3: The results of the alignment to *Abramis brama* transcriptome**

Number of reads per sample categorized right after the alignment. The amount of reads overlapping genes ranges from 43.47% to 62.31%, with 54.95% as the average.

| Category       | Overlapping Genes | Overlapping Genes (%) | No Feature | Multimapping | Unmapped | Total    |
|----------------|-------------------|-----------------------|------------|--------------|----------|----------|
| K_AB_rep1      | 7698845           | 55.03                 | 2825912    | 1419807      | 2046601  | 13991165 |
| K_AB_rep2      | 6430633           | 55.24                 | 2267217    | 1151966      | 1792428  | 11642244 |
| K_AB_rep3      | 7514158           | 55.59                 | 2575509    | 1354267      | 2073364  | 13517298 |
| K_AB_rep4      | 7935968           | 52.10                 | 3170119    | 1653911      | 2472119  | 15232117 |
| K_AB_rep5      | 6580186           | 54.86                 | 2408040    | 1179814      | 1826290  | 11994330 |
| K_BK_AB_rep1   | 7330579           | 51.53                 | 2812779    | 1698059      | 2385224  | 14226641 |
| K_BK_AB_rep2   | 7295934           | 49.92                 | 2898643    | 1799990      | 2620448  | 14615015 |
| K_BK_AB_rep3   | 5772111           | 43.47                 | 3008889    | 2049223      | 2447959  | 13278182 |
| K_BK_AB_rep4   | 6249593           | 47.04                 | 2796313    | 1686355      | 2552150  | 13284411 |
| K_BK_AB_rep5   | 7357743           | 57.40                 | 2212328    | 1238595      | 2010467  | 12819133 |
| K_BK_RR_rep1   | 8444071           | 52.15                 | 2995115    | 1971874      | 2780129  | 16191189 |
| K_BK_RR_rep2   | 6650875           | 51.52                 | 2378995    | 1638520      | 2241583  | 12909973 |
| K_BK_RR_rep3   | 7150748           | 50.79                 | 2598598    | 1738756      | 2591763  | 14079865 |
| K_BK_RR_rep4   | 6290064           | 54.21                 | 2163640    | 1316310      | 1832869  | 11602883 |
| K_BK_RR_rep5   | 7596626           | 52.00                 | 2699188    | 1682257      | 2629950  | 14608021 |
| K_F1_ABRR_rep1 | 6413690           | 54.81                 | 2142563    | 1308812      | 1836261  | 11701326 |
| K_F1_ABRR_rep2 | 6568258           | 56.45                 | 1978142    | 1228977      | 1860400  | 11635777 |
| K_F1_ABRR_rep3 | 6694459           | 51.79                 | 2468355    | 1498099      | 2265676  | 12926589 |

|                 |         |       |         |         |         |          |
|-----------------|---------|-------|---------|---------|---------|----------|
| K_F1_ABRR_rep4  | 6997365 | 45.30 | 3327524 | 2063266 | 3058250 | 15446405 |
| K_F1_ABRR_rep5  | 7190246 | 48.32 | 3020797 | 1767874 | 2900535 | 14879452 |
| K_RR_rep1       | 7969434 | 52.87 | 2682055 | 1802724 | 2618457 | 15072670 |
| K_RR_rep3       | 6907461 | 50.67 | 2475172 | 1485144 | 2764767 | 13632544 |
| K_RR_rep4       | 8511770 | 55.01 | 2519315 | 1646630 | 2795526 | 15473241 |
| K_RR_rep5       | 6406952 | 56.38 | 1812591 | 1189643 | 1954472 | 11363658 |
| OK_AB_rep1      | 8145222 | 58.98 | 2495840 | 1274366 | 1895793 | 13811221 |
| OK_AB_rep2      | 7262081 | 58.83 | 2229851 | 1067935 | 1783606 | 12343473 |
| OK_AB_rep3      | 7909319 | 60.78 | 2214243 | 1137938 | 1751187 | 13012687 |
| OK_AB_rep4      | 7663575 | 60.47 | 2074946 | 1060206 | 1875425 | 12674152 |
| OK_AB_rep5      | 7107533 | 58.13 | 2250968 | 1093862 | 1774056 | 12226419 |
| OK_BK_AB_rep1   | 7746022 | 58.81 | 2240554 | 1196200 | 1988270 | 13171046 |
| OK_BK_AB_rep2   | 7067796 | 57.70 | 2193082 | 1155442 | 1833327 | 12249647 |
| OK_BK_AB_rep3   | 7847088 | 62.31 | 1949477 | 1160255 | 1636045 | 12592865 |
| OK_BK_AB_rep4   | 7344288 | 57.80 | 2253798 | 1193225 | 1914919 | 12706230 |
| OK_BK_AB_rep5   | 7135462 | 57.35 | 2242858 | 1183542 | 1879600 | 12441462 |
| OK_BK_RR_rep1   | 7441547 | 55.44 | 2297848 | 1335275 | 2347142 | 13421812 |
| OK_BK_RR_rep2   | 7526842 | 58.22 | 2035628 | 1254039 | 2111139 | 12927648 |
| OK_BK_RR_rep3   | 7008153 | 55.06 | 2239854 | 1243894 | 2235262 | 12727163 |
| OK_BK_RR_rep5   | 6311845 | 54.82 | 1900021 | 1154030 | 2147288 | 11513184 |
| OK_F1_ABRR_rep1 | 4496585 | 57.78 | 1321314 | 744308  | 1219545 | 7781752  |
| OK_F1_ABRR_rep3 | 6392471 | 57.08 | 1906191 | 1141299 | 1759423 | 11199384 |

|                 |         |       |         |         |         |          |
|-----------------|---------|-------|---------|---------|---------|----------|
| OK_F1_ABRR_rep4 | 6474427 | 57.42 | 1909622 | 1060572 | 1830983 | 11275604 |
| OK_F1_ABRR_rep5 | 7747019 | 55.79 | 2456054 | 1309859 | 2372293 | 13885225 |
| OK_RR_rep1      | 6692363 | 58.81 | 1667566 | 1064922 | 1955259 | 11380110 |
| OK_RR_rep3      | 7775682 | 58.96 | 1918601 | 1197384 | 2295687 | 13187354 |
| OK_RR_rep4      | 7750338 | 56.46 | 2171433 | 1328227 | 2476800 | 13726798 |
| OK_RR_rep5      | 7574802 | 56.31 | 2102767 | 1231484 | 2543815 | 13452868 |

**Table S4: The results of the alignment to *Rutilus rutilus* transcriptome**

Number of reads per sample categorized right after the alignment. The amount of reads overlapping genes ranges from 44.41% to 60.17%, with 54.17% as the average.

| Category       | Overlapping Genes | Overlapping Genes (%) | No Feature | Multimapping | Unmapped | Total    |
|----------------|-------------------|-----------------------|------------|--------------|----------|----------|
| K_AB_rep1      | 7533355           | 53.84                 | 2455337    | 1233882      | 2768917  | 13991491 |
| K_AB_rep2      | 6341781           | 54.47                 | 1977549    | 975298       | 2347600  | 11642228 |
| K_AB_rep3      | 7371584           | 54.53                 | 2273167    | 1124804      | 2747726  | 13517281 |
| K_AB_rep4      | 7754712           | 50.91                 | 2808281    | 1437048      | 3232064  | 15232105 |
| K_AB_rep5      | 6439631           | 53.69                 | 2105317    | 1053368      | 2396009  | 11994325 |
| K_BK_AB_rep1   | 7263712           | 51.06                 | 2737191    | 1491080      | 2734943  | 14226926 |
| K_BK_AB_rep2   | 6951901           | 47.57                 | 2873295    | 1810317      | 2979492  | 14615005 |
| K_BK_AB_rep3   | 6000170           | 45.19                 | 2884696    | 1630412      | 2762902  | 13278180 |
| K_BK_AB_rep4   | 6208921           | 46.74                 | 2724820    | 1510705      | 2839961  | 13284407 |
| K_BK_AB_rep5   | 7063542           | 55.10                 | 2302140    | 1184592      | 2268845  | 12819119 |
| K_BK_RR_rep1   | 8266014           | 51.05                 | 3401839    | 1864335      | 2658992  | 16191180 |
| K_BK_RR_rep2   | 6573257           | 50.92                 | 2723955    | 1459552      | 2153205  | 12909969 |
| K_BK_RR_rep3   | 6988573           | 49.64                 | 3018499    | 1604264      | 2468529  | 14079865 |
| K_BK_RR_rep4   | 6374527           | 54.94                 | 2426063    | 1099467      | 1703287  | 11603344 |
| K_BK_RR_rep5   | 7585586           | 51.93                 | 2984817    | 1549998      | 2487622  | 14608023 |
| K_F1_ABRR_rep1 | 6161087           | 52.65                 | 2379394    | 1232529      | 1928559  | 11701569 |
| K_F1_ABRR_rep2 | 6344772           | 54.53                 | 2201673    | 1157495      | 1931834  | 11635774 |
| K_F1_ABRR_rep3 | 6486246           | 50.18                 | 2652164    | 1386323      | 2401855  | 12926588 |

|                 |         |       |         |         |         |          |
|-----------------|---------|-------|---------|---------|---------|----------|
| K_F1_ABRR_rep4  | 6859406 | 44.41 | 3456258 | 1919940 | 3210796 | 15446400 |
| K_F1_ABRR_rep5  | 7031523 | 47.26 | 3184675 | 1684894 | 2978359 | 14879451 |
| K_RR_rep1       | 7897900 | 52.40 | 3355974 | 1729879 | 2089305 | 15073058 |
| K_RR_rep3       | 6967065 | 51.11 | 3047409 | 1371459 | 2246622 | 13632555 |
| K_RR_rep4       | 8310971 | 53.71 | 3242792 | 1644090 | 2275390 | 15473243 |
| K_RR_rep5       | 6365627 | 56.02 | 2249111 | 1139152 | 1609777 | 11363667 |
| OK_AB_rep1      | 7870316 | 56.99 | 2248592 | 1136466 | 2555832 | 13811206 |
| OK_AB_rep2      | 7019299 | 56.87 | 1947060 | 915131  | 2461964 | 12343454 |
| OK_AB_rep3      | 7652611 | 58.81 | 2007468 | 995313  | 2357271 | 13012663 |
| OK_AB_rep4      | 7626614 | 60.17 | 1776798 | 849572  | 2421343 | 12674327 |
| OK_AB_rep5      | 6910112 | 56.52 | 1955626 | 936444  | 2424213 | 12226395 |
| OK_BK_AB_rep1   | 7718136 | 58.60 | 2122282 | 1006025 | 2324597 | 13171040 |
| OK_BK_AB_rep2   | 6956522 | 56.79 | 2141237 | 1014850 | 2137037 | 12249646 |
| OK_BK_AB_rep3   | 7252804 | 57.59 | 2183369 | 1184842 | 1971845 | 12592860 |
| OK_BK_AB_rep4   | 7196065 | 56.63 | 2152630 | 1026939 | 2330580 | 12706214 |
| OK_BK_AB_rep5   | 7047707 | 56.65 | 2123409 | 1052276 | 2218072 | 12441464 |
| OK_BK_RR_rep1   | 7576461 | 56.45 | 2514572 | 1079214 | 2251568 | 13421815 |
| OK_BK_RR_rep2   | 7443413 | 57.58 | 2389754 | 1105788 | 1988710 | 12927665 |
| OK_BK_RR_rep3   | 7120331 | 55.94 | 2518963 | 1049708 | 2038434 | 12727436 |
| OK_BK_RR_rep5   | 6293021 | 54.66 | 2305628 | 979388  | 1935154 | 11513191 |
| OK_F1_ABRR_rep1 | 4363806 | 56.07 | 1463118 | 682450  | 1272723 | 7782097  |
| OK_F1_ABRR_rep3 | 6318359 | 56.42 | 2049921 | 974193  | 1856914 | 11199387 |

|                 |         |       |         |         |         |          |
|-----------------|---------|-------|---------|---------|---------|----------|
| OK_F1_ABRR_rep4 | 6449729 | 57.20 | 2007987 | 865834  | 1952047 | 11275597 |
| OK_F1_ABRR_rep5 | 7810888 | 56.25 | 2520625 | 1051354 | 2502366 | 13885233 |
| OK_RR_rep1      | 6682473 | 58.72 | 2140610 | 959922  | 1597528 | 11380533 |
| OK_RR_rep3      | 7754892 | 58.81 | 2451111 | 1102947 | 1878413 | 13187363 |
| OK_RR_rep4      | 7791207 | 56.76 | 2705790 | 1181214 | 2048590 | 13726801 |
| OK_RR_rep5      | 7718928 | 57.38 | 2598267 | 1062619 | 2073064 | 13452878 |

### **File S3: The transcriptome analysis details**

We produced two transcriptome assemblies for this study, one for *Abramis brama* and the other one for *Rutilus rutilus*. The approach was identical, and the results were very similar.

Transcriptome assembly was carried out by three different tools with multiple k-mer length values (Trinity: 21, 25, 31; rnaSPAdes: 29, 47, 69, 89, 107, 127; MEGAHIT: 21, 29, 39, 59, 79, 99, 119, 141) according to suggestion in

[http://arthropods.eugenesis.org/EvidentialGene/about/EvidentialGene\\_trassembly\\_pipe.html](http://arthropods.eugenesis.org/EvidentialGene/about/EvidentialGene_trassembly_pipe.html) that too many transcript assemblies is much better than too few. It allows one then to apply biological criteria to pick out the best ones. Most assembling tools provide the option to set the k-mer length. Some use multiple k-mer values by default (namely MEGAHIT, rnaSPAdes), and some do not (namely Trinity). Moreover, different tools provide different algorithms. Thus, a combination of multiple approaches can provide the best way to utilize their strongest features and produce the most fruitful set of transcripts. All resulting transcripts are then merged together using EvidentialGene's tr2aaccs on the basis of CDS-DNA local alignment identity classification. This approach narrows down the number of produced transcripts significantly while keeping the variability of assembled transcripts because the best transcriptome assembly is not about the highest number of the transcripts or longest transcripts but more likely about the highest ratio and completeness of useful information in the transcripts, which in most cases means the protein-coding sequences. The transcriptome assemblies were subjected to various quality control tools: TransRate, rnaQUAST, and BUSCO with its metazoa, vertebrata, and actinopterygian lineages of version odb10. This excludes the various k-mer length-based MEGAHIT assemblies as this tool uses a similar approach on a smaller scale on its own. Next, the annotation step was performed using TransDecoder and Trinotate as primary tools taking advantage of the following tools and databases: UniProtKB/Swiss-Prot database, MEROPS database, RefSeq database, NCBI Nucleotide database in combination with BLAST+; Pfam database in combination with HMMER; and SignalP as a standalone tool. Finally, the abundance of the resulting transcripts was quantified using Salmon. All compatible results and statistics were processed by MultiQC.

As one can see in both transcriptome assemblies results (Table S5-S8), the merged and MEGAHIT assemblies do not have the highest number of transcripts, the highest average length of assembled transcripts, the best N50, nor even the best rate of predicted genes in transcripts (according to the rnaQUAST statistics), however, the other assemblies provide a great portion of duplicity in the transcripts according to the results from BUSCO. That could lead to multi mapping of reads when using transcriptome as a reference. Since the merged assembly achieved the same with lesser transcripts and a better ratio of predicted genes, we decided to use the merged assembly as the main assembly in both cases.

**Table S5: rnaQUAST statistics of *R. rutilus* transcriptome assemblies**

| METRICS/<br>TRANSCRIPTS | Transcripts | Transcripts ><br>500 bp | Predicted<br>genes | Average<br>length of<br>assembled<br>transcripts | Longest<br>transcript | Total length | Transcript<br>N50 |
|-------------------------|-------------|-------------------------|--------------------|--------------------------------------------------|-----------------------|--------------|-------------------|
| trinity_21              | 296745      | 132332                  | 69781              | 870.1                                            | 24383                 | 258188034    | 1596              |
| trinity_25              | 401094      | 181425                  | 98748              | 974.3                                            | 27554                 | 390794299    | 2009              |
| trinity_31              | 406672      | 192963                  | 109721             | 1097.7                                           | 29300                 | 446415011    | 2435              |
| spades_29               | 229111      | 149311                  | 72793              | 1261.4                                           | 29414                 | 289011564    | 2096              |
| spades_47               | 233403      | 150275                  | 76536              | 1372.2                                           | 24903                 | 320264199    | 2425              |
| spades_69               | 205064      | 123280                  | 67515              | 1382.6                                           | 25469                 | 283522179    | 2628              |
| spades_89               | 204093      | 106516                  | 60819              | 1205.5                                           | 25795                 | 246038857    | 2467              |
| spades_107              | 196482      | 97200                   | 56801              | 1104.6                                           | 25795                 | 217039306    | 2244              |
| spades_127              | 182802      | 86408                   | 53793              | 1001.8                                           | 24853                 | 183122083    | 1954              |
| megahit                 | 223868      | 104537                  | 35498              | 832.3                                            | 26698                 | 186324336    | 1261              |
| merged                  | 182019      | 62405                   | 33332              | 692.1                                            | 27101                 | 125970660    | 1152              |

**Table S6: rnaQUAST statistics of *A. brama* transcriptome assemblies**

| METRICS/<br>TRANSCRIPTS | Transcripts | Transcripts ><br>500 bp | Predicted<br>genes | Average<br>length of<br>assembled<br>transcripts | Longest<br>transcript | Total length | Transcript<br>N50 |
|-------------------------|-------------|-------------------------|--------------------|--------------------------------------------------|-----------------------|--------------|-------------------|
| trinity_21              | 287333      | 127549                  | 65530              | 870.7                                            | 27565                 | 250177130    | 1595              |
| trinity_25              | 360224      | 157447                  | 84962              | 962                                              | 30511                 | 346549893    | 2033              |
| trinity_31              | 358995      | 165155                  | 92496              | 1080.2                                           | 29985                 | 387788366    | 2443              |
| spades_29               | 222190      | 146018                  | 70044              | 1275.5                                           | 26948                 | 283400283    | 2126              |
| spades_47               | 219961      | 142274                  | 72465              | 1422                                             | 23659                 | 312788151    | 2562              |
| spades_69               | 188681      | 115265                  | 62350              | 1482.7                                           | 20774                 | 279755950    | 2893              |
| spades_89               | 184516      | 99643                   | 55867              | 1317                                             | 29496                 | 243010930    | 2772              |
| spades_107              | 174934      | 90518                   | 51521              | 1227.9                                           | 27173                 | 214805195    | 2580              |
| spades_127              | 159414      | 79606                   | 46847              | 1120.5                                           | 27179                 | 178619966    | 2299              |
| megahit                 | 192618      | 98671                   | 33189              | 929.6                                            | 28643                 | 179049008    | 1502              |
| merged                  | 172630      | 62277                   | 32380              | 724.2                                            | 28643                 | 125013350    | 1232              |

**Table S7: BUSCO statistics of *R. rutilus* transcriptome assemblies**

| Category                  | Complete and single-copy BUSCOs | Complete and duplicated BUSCOs | Fragmented BUSCOs | Missing BUSCOs |
|---------------------------|---------------------------------|--------------------------------|-------------------|----------------|
| megahit.vertebrata        | 2932                            | 65                             | 184               | 173            |
| merged.vertebrata         | 3047                            | 61                             | 56                | 190            |
| spades_107.vertebrata     | 1867                            | 1234                           | 74                | 179            |
| spades_127.vertebrata     | 1962                            | 1089                           | 87                | 216            |
| spades_29.vertebrata      | 1658                            | 1440                           | 112               | 144            |
| spades_47.vertebrata      | 1511                            | 1620                           | 79                | 144            |
| spades_69.vertebrata      | 1506                            | 1620                           | 81                | 147            |
| spades_89.vertebrata      | 1707                            | 1419                           | 75                | 153            |
| trinity_21.vertebrata     | 1516                            | 1543                           | 114               | 181            |
| trinity_25.vertebrata     | 1027                            | 2086                           | 82                | 159            |
| trinity_31.vertebrata     | 938                             | 2191                           | 67                | 158            |
| megahit.actinopterygii    | 3033                            | 59                             | 156               | 392            |
| merged.actinopterygii     | 3142                            | 91                             | 49                | 358            |
| spades_107.actinopterygii | 1949                            | 1232                           | 82                | 377            |
| spades_127.actinopterygii | 2010                            | 1082                           | 88                | 460            |
| spades_29.actinopterygii  | 1737                            | 1463                           | 101               | 339            |
| spades_47.actinopterygii  | 1594                            | 1640                           | 74                | 332            |
| spades_69.actinopterygii  | 1596                            | 1636                           | 69                | 339            |
| spades_89.actinopterygii  | 1787                            | 1432                           | 76                | 345            |
| trinity_21.actinopterygii | 1609                            | 1559                           | 87                | 385            |
| trinity_25.actinopterygii | 1121                            | 2098                           | 59                | 362            |
| trinity_31.actinopterygii | 1037                            | 2199                           | 52                | 352            |
| megahit.metazoa           | 888                             | 37                             | 26                | 3              |
| merged.metazoa            | 876                             | 42                             | 11                | 25             |
| spades_107.metazoa        | 566                             | 382                            | 3                 | 3              |
| spades_127.metazoa        | 610                             | 338                            | 4                 | 2              |
| spades_29.metazoa         | 454                             | 490                            | 8                 | 2              |
| spades_47.metazoa         | 418                             | 533                            | 1                 | 2              |
| spades_69.metazoa         | 426                             | 521                            | 5                 | 2              |
| spades_89.metazoa         | 493                             | 455                            | 4                 | 2              |
| trinity_21.metazoa        | 473                             | 468                            | 7                 | 6              |
| trinity_25.metazoa        | 352                             | 592                            | 4                 | 6              |
| trinity_31.metazoa        | 337                             | 614                            | 1                 | 2              |

**Table S8: BUSCO statistics of *A. brama* transcriptome assemblies**

| Category                  | Complete and single-copy BUSCOs | Complete and duplicated BUSCOs | Fragmented BUSCOs | Missing BUSCOs |
|---------------------------|---------------------------------|--------------------------------|-------------------|----------------|
| megahit.actinopterygii    | 2978                            | 78                             | 197               | 387            |
| merged.actinopterygii     | 3140                            | 72                             | 50                | 378            |
| spades_107.actinopterygii | 1973                            | 1217                           | 55                | 395            |
| spades_127.actinopterygii | 2184                            | 946                            | 74                | 436            |
| spades_29.actinopterygii  | 1790                            | 1400                           | 102               | 348            |
| spades_47.actinopterygii  | 1657                            | 1563                           | 77                | 343            |
| spades_69.actinopterygii  | 1698                            | 1534                           | 60                | 348            |
| spades_89.actinopterygii  | 1841                            | 1375                           | 60                | 364            |
| trinity_21.actinopterygii | 1678                            | 1464                           | 88                | 410            |
| trinity_25.actinopterygii | 1340                            | 1859                           | 53                | 388            |
| trinity_31.actinopterygii | 1271                            | 1939                           | 42                | 388            |
| megahit.vertebrata        | 2898                            | 65                             | 216               | 175            |
| merged.vertebrata         | 3043                            | 54                             | 62                | 195            |
| spades_107.vertebrata     | 1838                            | 1255                           | 72                | 189            |
| spades_127.vertebrata     | 2078                            | 988                            | 66                | 222            |
| spades_29.vertebrata      | 1679                            | 1413                           | 104               | 158            |
| spades_47.vertebrata      | 1543                            | 1578                           | 79                | 154            |
| spades_69.vertebrata      | 1572                            | 1551                           | 73                | 158            |
| spades_89.vertebrata      | 1703                            | 1396                           | 85                | 170            |
| trinity_21.vertebrata     | 1581                            | 1464                           | 117               | 192            |
| trinity_25.vertebrata     | 1243                            | 1856                           | 70                | 185            |
| trinity_31.vertebrata     | 1150                            | 1961                           | 68                | 175            |
| megahit.metazoa           | 889                             | 37                             | 25                | 3              |
| merged.metazoa            | 894                             | 34                             | 9                 | 17             |
| spades_107.metazoa        | 556                             | 393                            | 3                 | 2              |
| spades_127.metazoa        | 650                             | 300                            | 2                 | 2              |
| spades_29.metazoa         | 474                             | 473                            | 4                 | 3              |
| spades_47.metazoa         | 411                             | 538                            | 3                 | 2              |
| spades_69.metazoa         | 451                             | 498                            | 1                 | 4              |
| spades_89.metazoa         | 496                             | 453                            | 3                 | 2              |
| trinity_21.metazoa        | 519                             | 422                            | 9                 | 4              |
| trinity_25.metazoa        | 417                             | 531                            | 1                 | 5              |
| trinity_31.metazoa        | 391                             | 560                            | 0                 | 3              |

## Script S1: GO enrichment analysis results postprocessing code in R language

```
library("data.table")
library("clusterProfiler")
library("ontologyIndex")
library("splitstackshape")
library("pheatmap")
library("ggplot2")

wdir = "/mnt/ssd/ssd_1/workspace/martin/abramis_rutilus_DE"
go_dir = "/mnt/nfs/shared/CFBioinformatics/references_backup/general/GO/"
go_tab = fread(file =
"/mnt/nfs/shared/CFBioinformatics/references_backup/rutilus_rutilus/rutilus_rutilus_TA/annot/g
o_annotations.txt", header = F, fill = T, sep = '\t', col.names = c("gene_ID", "GO_ID"))
go_tab = cSplit(go_tab, "GO_ID", sep=",", direction = "long")
go_db <- get_ontology(paste0(go_dir, "go-basic.obo"), extract_tags = "everything")
go_tab <- data.table(GO_ID=go_db$id, GO_Name=go_db$name, GO_Category=unlist(go_db$namespace),
GO_Obsolete=go_db$obsolete)[go_tab, on="GO_ID"]
rm(go_db)

FC = 2 # FC cutoff
FC = log(FC, 2) # Get log2FC
FDR = 0.05 # Adj. p-val. cutoff
top_class = 10

inpdire = "/mnt/ssd/ssd_1/workspace/martin/abramis_rutilus_DE/mRNA_DE_featureCount"
conds = dir(inpdire, pattern = "_vs_")
for(cond in conds) {
  DE = "DESeq2.tsv"
  REGUL = "up"
  for(REGUL in c("up", "down", "both")){
    print(paste0("Working with ", REGUL, "-regulated genes of condition ", cond))

    outdire <-
paste0(wdir, "/GO_enrichment.using_data_from_trinotate/", cond, "/", FDR, "_", FDR, ".l2FC_", FC, "/", REGUL
)

    dir.create(outdire, recursive = T)
    setwd(outdire)

    de_tab = fread(paste0(inpdire, "/", cond, "/all/", DE), header = T, sep = "\t", select =
1:9)

    setnames(de_tab, "V1", "gene_id")
    de_tab = de_tab[go_tab, on="gene_id==gene_ID"]

    if(REGUL == "up"){
      signif = de_tab[!is.na(GO_ID) & GO_ID != "" & GO_Obsolete == FALSE & !is.na(GO_Name) &
!is.na(GO_Category) & !is.na(padj) & padj <= FDR & log2FoldChange >= FC,]
    }else if(REGUL == "down"){
      signif = de_tab[!is.na(GO_ID) & GO_ID != "" & GO_Obsolete == FALSE & !is.na(GO_Name) &
!is.na(GO_Category) & !is.na(padj) & padj <= FDR & -log2FoldChange >= FC,]
    }else if(REGUL == "both"){
      signif = de_tab[!is.na(GO_ID) & GO_ID != "" & GO_Obsolete == FALSE & !is.na(GO_Name) &
!is.na(GO_Category) & !is.na(padj) & padj <= FDR & abs(log2FoldChange) >= FC,]
    }else{
      "Unknown expression change."
    }

    if(signif[, .N] != 0) {
      res <- enricher(gene = signif$gene_id,
        TERM2GENE =
de_tab[!is.na(GO_ID), .N, by=. (GO_ID, gene_id)][, . (term=GO_ID, gene=gene_id)],
        TERM2NAME =
de_tab[!is.na(GO_ID), .N, by=. (GO_ID, GO_Name)][, . (term=GO_ID, name=GO_Name)],
        minGSSize = 2,
        maxGSSize = 30000,
        pAdjustMethod = "BH",
```

```

        pvalueCutoff = 1,
        qvalueCutoff = 1)
res@result <- unique(go_tab[,.(GO_ID, GO_Category)][data.table(res@result),
on="GO_ID==ID"]])
fwrite(as.data.table(res@result), "enricher_GO.tsv", sep = "\t", quote = F, row.names
= F, col.names = T)

wtab =
res@result[GO_Category!="",.SD[order(qvalue)][1:top_class,.SD,.SDcols=patterns("Ratio|^GO_|Des
cription")],.(GO_Category)]
setnames(wtab,c("Description","GeneRatio","BgRatio"),
c("GO_Description","DE_genes","All_genes"))
wtab = melt.data.table(wtab, measure.vars = patterns("_genes"))
wtab[,fvalue:=sapply(value, function(x) as.double(eval(parse(text=x))))]
plot_name_prefix =
paste0("GO_enrich.",cond,".FDR_",FDR,".l2FC_",FC,".",REGUL,".top_",top_class,"_by_groups")
# horizontal
hplot = ggplot(wtab, aes(x=paste0(GO_Description,"\n",GO_ID), y=fvalue)) +
  geom_bar(aes(fill=variable), stat="identity", position=position_dodge()) +
  geom_text(aes(label=value, color=variable), hjust=0.5, vjust=-0.3, size=2.8)+
  facet_wrap(~ GO_Category, scales = "free_x") +
  theme(axis.text.x = element_text(angle = 60, hjust = 1)) +
  scale_y_continuous(labels = percent, breaks = scales::extended_breaks(n=10)) +
  labs(x = "GO terms classification",
       y = "Enrichment ratios (%)",
       title = paste0("GO enrichment analysis for comparison ",cond),
       subtitle = paste0("DE genes filtered by FDR <= ",FDR," and
",ifelse(REGUL=="both","abs(log2FC) >= ",paste0("log2FC ",ifelse(REGUL=="up",">= ", "<= -
"))),FC),
       fill = "Gene set",
       color = "Gene set")
ggsave(paste0(plot_name_prefix,".horz.png"), hplot, width = 16, height = 9, units =
"in")
ggsave(paste0(plot_name_prefix,".horz.pdf"), hplot, width = 16, height = 9, units =
"in")
# vertical
vplot = ggplot(wtab, aes(y=paste0(GO_Description,"\n",GO_ID), x=fvalue)) +
  geom_bar(aes(fill=variable), stat="identity", position=position_dodge()) +
  geom_text(aes(label=value, color=variable,
vjust=fifelse(variable=="DE_genes",1.2,-0.2)), hjust=-0.1, size=3.5)+
  facet_wrap(~ GO_Category, scales = "free_y", ncol = 1) +
  theme(axis.text.y = element_text(size = 12),
        axis.text.x = element_text(size = 12)) +
  scale_x_continuous(labels = percent, breaks = scales::extended_breaks(n=10)) +
  labs(y = "GO terms classification",
       x = "Enrichment ratios (%)",
       title = paste0("GO enrichment analysis for comparison ",cond),
       subtitle = paste0("DE genes filtered by FDR <= ",FDR," and
",ifelse(REGUL=="both","abs(log2FC) >= ",paste0("log2FC ",ifelse(REGUL=="up",">= ", "<= -
"))),FC),
       fill = "Gene set",
       color = "Gene set")
ggsave(paste0(plot_name_prefix,".vert.png"), vplot, width = 16, height = 16, units =
"in")
ggsave(paste0(plot_name_prefix,".vert.pdf"), vplot, width = 16, height = 16, units =
"in")
}
}
}

#####
library(pheatmap)
library(openxlsx)

wdir = "/mnt/ssd/ssd_1/workspace/martin/abramis_rutilus_DE/"

FC = 2 # FC cutoff

```

```

FC = log(FC, 2) # Get log2FC
FDR = 0.05 # Adj. p-val. cutoff
max_rows = 100
breaksList = seq(0, 1, by = 0.1)

treatment = c("OK", "PH")
control = c("K")
lineages = c("RR", "AB", "BK_AB", "BK_RR", "F1_ABRR", "F1_RRAB")
directions = c("up", "down")

dir = directions[1]
ctrl = control[1]
trt = treatment[1]
lin = lineages[1]
for(dir in directions) {
  for(ctrl in control) {
    for(trt in treatment) {
      conds = c()
      for(lin in lineages) {
        cond = paste(trt, lin, "vs", ctrl, lin, sep = "_")
        inp =
paste0(wdir, "/GO_enrichment.using_data_from_trinotate/", cond, "/FDR_", FDR, ".l2FC_", FC, "/", dir, "
/enricher_GO.tsv")
        if(file.exists(inp)) conds = append(conds, cond)
      }
      tab = Reduce(function(...) {merge(..., by = c("GO_ID", "GO_Category", "GO_Description"),
all = T)},
        lapply(conds, function(cond) {

          fread(paste0(wdir, "/GO_enrichment.using_data_from_trinotate/", cond, "/FDR_", FDR, ".l2FC_
", FC, "/", dir, "/enricher_GO.tsv"),
            sep = "\t",
            select =
c("GO_ID", "GO_Category", "Description", "GeneRatio", "BgRatio", "qvalue", "geneID", "Count"),
            col.names =
c("GO_ID", "GO_Category", "GO_Description", paste0(cond, ".DEG_ratio"),
              paste0(cond, ".all_genes_ratio"), paste0(cond, ".q-
value"), paste0(cond, ".gene_IDs"), paste0(cond, ".gene_count"))
            })
          )
          fwrite(tab[, .SD, .SDcols=patterns("gene_IDs|^GO_")],

            paste0(wdir, "/GO_enrichment.using_data_from_trinotate/GO_terms.", trt, "_vs_", ctrl, ".FDR
_", FDR, ".l2FC_", FC, ".", dir, "_reg.full.tsv"),
            sep = '\t',
            row.names = F,
            col.names = T,
            quote = F)
          tab_copy = tab[, .SD, .SDcols=patterns("q-value")]
          tab_copy[is.na(tab_copy)] = 1
          tab_copy[, sum:=rowSums(.SD)]
          tab[, sum:=tab_copy$sum]
          tab_copy = tab[order(sum)]
          fwrite(tab_copy[, .SD, .SDcols=patterns("q-value|^GO_")],

            paste0(wdir, "/GO_enrichment.using_data_from_trinotate/GO_heatmap.", trt, "_vs_", ctrl, ".F
DR_", FDR, ".l2FC_", FC, ".", dir, "_reg.full.tsv"),
            sep = '\t',
            row.names = F,
            col.names = T,
            quote = F)
          hm = pheatmap(tab_copy[1:max_rows, .SD, .SDcols=patterns("q-value")],
            main = paste0("GO enrichment for ", trt, "_vs_", ctrl, " (top
", max_rows, ") \n[FDR <= ", FDR, " and log2FC ", ifelse(dir=="up", ">= ", "<= -"), FC, "]"),
            cluster_rows = F,
            cluster_cols = T,
            na_col = "black",

```

```

        angle_col = 315,
        color = colorRampPalette(c("mediumblue", "white"))(length(breaksList)),
        breaks = breaksList,
        labels_row = tab_copy[1:max_rows, paste0(GO_ID, ": ", GO_Description)])

    pdf(paste0(wdir, "/GO_enrichment.using_data_from_trinotate/GO_heatmap.", trt, "_vs_", ctrl
, ".FDR_", FDR, ".l2FC_", FC, ".", dir, "_reg.top_", max_rows, ".pdf"),
        width = 9,
        height = 16,
        pointsize = 12)
    print(hm)
    dev.off()
  }
}

#####
library(data.table)
library(ggplot2)

wdir = "/mnt/ssd/ssd_1/workspace/martin/abramis_rutilus_DE/"

FC = 2 # FC cutoff
FC = log(FC, 2) # Get log2FC
FDR = 0.05 # Adj. p-val. cutoff
max_rows = 10
breaksList = seq(0, 1, by = 0.1)

treatment = c("OK", "PH")
control = c("K")
lineages = c("RR", "AB", "BK_AB", "BK_RR", "F1_ABRR", "F1_RRAB")
directions = c("up", "down", "both")

dir = directions[1]
ctrl = control[1]
trt = treatment[1]
lin = lineages[1]
for(dir in directions) {
  for(ctrl in control) {
    for(trt in treatment) {
      conds = c()
      for(lin in lineages) {
        cond = paste(trt, lin, "vs", ctrl, lin, sep = "_")
        inp =
paste0(wdir, "/GO_enrichment.using_data_from_trinotate/", cond, "/FDR_", FDR, ".l2FC_", FC, "/", dir,
/enricher_GO.tsv")
        if(file.exists(inp)) conds = append(conds, cond)
      }
      tab = Reduce(function(...) {merge(..., by = c("GO_ID", "GO_Category", "GO_Description"),
all = T)},
        lapply(conds, function(cond) {
          tt =
fread(paste0(wdir, "/GO_enrichment.using_data_from_trinotate/", cond, "/FDR_", FDR, ".l2FC_", FC, "/"
, dir, "/enricher_GO.tsv"),
          sep = "\t",
          select =
c("GO_ID", "GO_Category", "Description", "GeneRatio", "BgRatio", "qvalue", "geneID", "Count"))
          tt[, DEG_ratio := sapply(GeneRatio, function(x)
as.double(eval(parse(text=x)))))]
          tt[, all_genes_ratio := sapply(BgRatio, function(x)
as.double(eval(parse(text=x)))))]
          setnames(tt,
c("GO_ID", "GO_Category", "Description", "GeneRatio", "BgRatio", "DEG_ratio", "all_genes_ratio", "qva
lue", "geneID", "Count"),
            c("GO_ID", "GO_Category", "GO_Description", paste0(cond, ".GeneRatio"), paste0(cond, ".BgRat
io"), paste0(cond, ".DEG_ratio"),

```

```

        paste0(cond, ".all_genes_ratio"), paste0(cond, ".q-
value"), paste0(cond, ".gene_IDs"), paste0(cond, ".gene_count"))
        return(tt)
    })
)
tab_copy = tab[, .SD, .SDcols=patterns("q-value")]
tab_copy[is.na(tab_copy)] = 1
tab_copy[, sum:=rowSums(.SD)]
tab[, sum:=tab_copy$sum]
tab[, show:=GO_ID %in% tab[, .SD[order(sum), GO_ID][1:max_rows], GO_Category]$V1]
ltab = melt.data.table(tab, id.vars = c("GO_ID", "GO_Category", "GO_Description",
"sum", "show"),
                        variable.name = "lineage",
                        measure.vars =
patterns(GeneRatio=".GeneRatio$", DEG_ratio=".DEG_ratio$", BgRatio=".BgRatio$", all_genes_ratio="
.all_genes_ratio$",
                        qvalue=".q-
value$", gene_IDs=".gene_IDs$", gene_count=".gene_count$"))
ltab[, lineage:=conds[lineage]]
ltab[, enrichment:=DEG_ratio/all_genes_ratio]
plot_name_prefix =
paste0(wdir, "/GO_enrichment.using_data_from_trinotate/GO_enrich_summary.", trt, "_vs_", ctrl, ".FDR_
", FDR, ".12FC_", FC, ".", dir, ".top_", max_rows, "_by_groups")
ggplot(ltab[GO_Category!=" " & show], aes(x=enrichment,
y=paste0(GO_Description, "\n", GO_ID))) +
  geom_point(aes(color=-log2(qvalue), size=gene_count)) +
  # lims(y =
unique(ltab[GO_Category!=" ", .(GO_ID, GO_Category, GO_Description, sum)]), .SD[order(sum), paste0(G
O_Description, "\n", GO_ID)][1:10], .(GO_Category)]$V1) +
  facet_grid(vars(GO_Category), vars(lineage), scales = "free") +
  scale_x_continuous(breaks = scales::extended_breaks(n=8)) +
  labs(y = "GO terms classification",
       x = "Enrichment",
       title = paste0("GO enrichment analysis summary"),
       subtitle = paste0("DE genes filtered by FDR <= ", FDR, " and
", ifelse(dir=="both", "abs(log2FC) >= ", paste0("log2FC ", ifelse(dir=="up", ">= ", "<= -"))), FC),
       size = "DEGs count",
       color = "S-value")
ggsave(paste0(plot_name_prefix, ".png"), width = 16, height = 12, units = "in")
ggsave(paste0(plot_name_prefix, ".pdf"), width = 16, height = 12, units = "in")
}
}

#####
library(data.table)
library(ggplot2)
library(ggnewscale)

wdir = "/mnt/ssd/ssd_1/workspace/martin/abramis_rutilus_DE/"

FC = 2 # FC cutoff
FC = log(FC, 2) # Get log2FC
FDR = 0.05 # Adj. p-val. cutoff
max_rows = 10
breaksList = seq(0, 1, by = 0.1)

treatment = c("OK", "PH")
control = c("K")
lineages = c("RR", "AB", "BK_AB", "BK_RR", "F1_ABRR", "F1_RRAB")
directions = c("up", "down")

selected_GOs =
c("GO:0030218", "GO:0020037", "GO:0008009", "GO:0006955", "GO:0050896", "GO:0005839", "GO:0051603", "
GO:0004867", "GO:0071353", "GO:0045070", "GO:0005080", "GO:0005509", "GO:0005515", "GO:0005178", "GO:
0045638", "GO:0004252", "GO:0001946")

```

```

ctrl = control[1]
trt = treatment[1]
lin = lineages[1]
for(ctrl in control) {
  for(trt in treatment) {
    # up-regulated genes
    conds = c()
    dir = "up"
    for(lin in lineages) {
      cond = paste(trt, lin, "vs", ctrl, lin, sep = "_")
      inp =
paste0(wdir, "/GO_enrichment.using_data_from_trinotate/", cond, "/FDR_", FDR, ".l2FC_", FC, "/", dir, "
/enricher_GO.tsv")
      if(file.exists(inp)) conds = append(conds, cond)
    }
    tab = Reduce(function(...) {merge(..., by = c("GO_ID", "GO_Category", "GO_Description"),
all = T)},
      lapply(conds, function(cond) {
        tt =
fread(paste0(wdir, "/GO_enrichment.using_data_from_trinotate/", cond, "/FDR_", FDR, ".l2FC_", FC, "/"
, dir, "/enricher_GO.tsv"),
          sep = "\t",
          select =
c("GO_ID", "GO_Category", "Description", "GeneRatio", "BgRatio", "qvalue", "geneID", "Count"))
        tt[,DEG_ratio:=sapply(GeneRatio, function(x)
as.double(eval(parse(text=x)))))]
        tt[,all_genes_ratio:=sapply(BgRatio, function(x)
as.double(eval(parse(text=x)))))]
        setnames(tt,
c("GO_ID", "GO_Category", "Description", "GeneRatio", "BgRatio", "DEG_ratio", "all_genes_ratio", "qva
lue", "geneID", "Count"),
          c("GO_ID", "GO_Category", "GO_Description", paste0(cond, ".GeneRatio"), paste0(cond, ".BgRat
io"), paste0(cond, ".DEG_ratio"),
            paste0(cond, ".all_genes_ratio"), paste0(cond, ".q-
value"), paste0(cond, ".gene_IDs"), paste0(cond, ".gene_count"))
        return(tt)
      })
    )
    tab[,show:=GO_ID %in% selected_GOs]
    utab = melt.data.table(tab, id.vars = c("GO_ID", "GO_Category", "GO_Description",
"show"),
      variable.name = "lineage",
      measure.vars =
patterns(GeneRatio=".GeneRatio$", DEG_ratio=".DEG_ratio$", BgRatio=".BgRatio$", all_genes_ratio="
.all_genes_ratio$",
        qvalue=".q-
value$", gene_IDs=".gene_IDs$", gene_count=".gene_count$"))
    utab[,lineage:=conds[lineage]]
    utab[,enrichment:=DEG_ratio/all_genes_ratio]
    utab[,direction:=dir]
    # down-regulated genes
    conds = c()
    dir = "down"
    for(lin in lineages) {
      cond = paste(trt, lin, "vs", ctrl, lin, sep = "_")
      inp =
paste0(wdir, "/GO_enrichment.using_data_from_trinotate/", cond, "/FDR_", FDR, ".l2FC_", FC, "/", dir, "
/enricher_GO.tsv")
      if(file.exists(inp)) conds = append(conds, cond)
    }
    tab = Reduce(function(...) {merge(..., by = c("GO_ID", "GO_Category", "GO_Description"),
all = T)},
      lapply(conds, function(cond) {
        tt =
fread(paste0(wdir, "/GO_enrichment.using_data_from_trinotate/", cond, "/FDR_", FDR, ".l2FC_", FC, "/"
, dir, "/enricher_GO.tsv"),

```

```

        sep = "\t",
        select =
c("GO_ID", "GO_Category", "Description", "GeneRatio", "BgRatio", "qvalue", "geneID", "Count"))
        tt[,DEG_ratio:=sapply(GeneRatio, function(x)
as.double(eval(parse(text=x))))]
        tt[,all_genes_ratio:=sapply(BgRatio, function(x)
as.double(eval(parse(text=x))))]
        setnames(tt,
c("GO_ID", "GO_Category", "Description", "GeneRatio", "BgRatio", "DEG_ratio", "all_genes_ratio", "q-
value", "geneID", "Count"),

        c("GO_ID", "GO_Category", "GO_Description", paste0(cond, ".GeneRatio"), paste0(cond, ".BgRat
io"), paste0(cond, ".DEG_ratio"),
        paste0(cond, ".all_genes_ratio"), paste0(cond, ".q-
value"), paste0(cond, ".gene_IDs"), paste0(cond, ".gene_count"))
        return(tt)
    })
    )
    tab[,show:=GO_ID %in% selected_GOs]
    dtab = melt.data.table(tab, id.vars = c("GO_ID", "GO_Category", "GO_Description",
"show"),
        variable.name = "lineage",
        measure.vars =
patterns(GeneRatio=".GeneRatio$", DEG_ratio=".DEG_ratio$", BgRatio=".BgRatio$", all_genes_ratio="
.all_genes_ratio$",
        qvalue=".q-
value$", gene_IDs=".gene_IDs$", gene_count=".gene_count$"))
    dtab[,lineage:=conds[lineage]]
    dtab[,enrichment:=DEG_ratio/all_genes_ratio]
    dtab[,direction:=dir]

    ltab = rbind(utab, dtab)

    plot_name_prefix =
paste0(wdir, "/GO_enrichment.using_data_from_trinotate/GO_enrich_selection.", trt, "_vs_", ctrl, ".
FDR_", FDR, ".l2FC_", FC, ".top_", max_rows, "_by_groups")
    ggplot(ltab[show==T], aes(x=enrichment, y=paste0(GO_Description, "\n", GO_ID))) +
    geom_point(aes(color=-log2(qvalue), size=gene_count), ltab[show==T & direction=="up"])
+
    scale_color_gradient(name = "S-value (Up)", low = "lightskyblue", high = "green3") +
    new_scale_color() +
    geom_point(aes(color=-log2(qvalue), size=gene_count), ltab[show==T &
direction=="down"]) +
    scale_color_gradient(name = "S-value (Down)", low = "orange", high = "red3") +
    #facet_grid(vars(GO_Category), vars(lineage), scales = "free") +
    facet_wrap(~lineage, nrow = 1, scales = "free_x") +
    scale_x_continuous(breaks = scales::extended_breaks(n=8)) +
    labs(y = "GO terms classification",
    x = "Enrichment",
    title = paste0("GO enrichment analysis for selection"),
    subtitle = paste0("DE genes filtered by FDR <= ", FDR, " and abs(log2FC) >= ", FC),
    size = "DEGs count") +
    theme_bw()
    ggsave(paste0(plot_name_prefix, ".png"), width = 16, height = 12, units = "in")
    ggsave(paste0(plot_name_prefix, ".pdf"), width = 16, height = 12, units = "in")
}
}

```

## Script S2: KEGG enrichment analysis results postprocessing code in R language

```
library("data.table")
library("pathview")
library("clusterProfiler")

wdir = "/mnt/ssd/ssd_1/workspace/martin/abramis_rutilus_DE"
ko_sufix = ".using_DRE_CCAR"
ko_tab = fread(file =
paste0("/mnt/nfs/shared/CFBioinformatics/references_backup/rutilus_rutilus/rutilus_rutilus_TA/
annot/longest_orfs.transcripts_to_KEGG", ko_sufix, ".tsv"), header = F, fill = T, sep = '\t',
col.names = c("transcript_ID", "KO_ID"))
tr2gene = fread(file =
"/mnt/nfs/shared/CFBioinformatics/references_backup/rutilus_rutilus/rutilus_rutilus_TA/annot/t
ranscript2gene.map", header = F, sep = '\t', col.names = c("genes", "transcripts"))
ko_tab = ko_tab[tr2gene, on="transcript_ID==transcripts"]

FC = 2 # FC cutoff
FC = log(FC, 2) # Get log2FC
FDR = 0.05 # Adj. p-val. cutoff

inpdire = "/mnt/ssd/ssd_1/workspace/martin/abramis_rutilus_DE/mRNA_DE_featureCount"
conds = dir(inpdire, pattern = "_vs_")
for(cond in conds) {
  DE = "DESeq2.tsv"
  for(REGUL in c("up", "down", "both")){
    print(paste0("Working with ", REGUL, "-regulated genes of condition ", cond))

    outdire <-
paste0(wdir, "/KEGG_enrichment.using_KAAS", ko_sufix, "/", cond, "/FDR_", FDR, ".12FC_", FC, "/", REGUL)
    dir.create(outdire, recursive = T)
    setwd(outdire)

    de_tab = fread(paste0(inpdire, "/", cond, "/all/", DE), header = T, sep = "\t", select =
1:9)
    setnames(de_tab, "V1", "gene_id")
    de_tab = de_tab[ko_tab, on="gene_id==genes"]

    if(REGUL == "up"){
      signif = de_tab[!is.na(KO_ID) & KO_ID != "" & !is.na(padj) & padj <= FDR &
log2FoldChange >= FC,
      .(gene_id, KO_ID, log2FoldChange)]
    }else if(REGUL == "down"){
      signif = de_tab[!is.na(KO_ID) & KO_ID != "" & !is.na(padj) & padj <= FDR & -
log2FoldChange >= FC,
      .(gene_id, KO_ID, log2FoldChange)]
    }else if(REGUL == "both"){
      signif = de_tab[!is.na(KO_ID) & KO_ID != "" & !is.na(padj) & padj <= FDR &
abs(log2FoldChange) >= FC,
      .(gene_id, KO_ID, log2FoldChange)]
    }else{
      "Unknown expression change."
    }

    kk = enrichKEGG(gene = unique(as.character(signif$KO_ID)),
      organism = 'ko',
      pvalueCutoff = 1,
      qvalueCutoff = 1,
      minGSSize = 2,
      maxGSSize = 30000,
      pAdjustMethod = "BH",
      universe = unique(as.character(de_tab[!is.na(KO_ID) & KO_ID !=
"", KO_ID])))
    fwrite(as.data.table(kk@result), "enrichKEGG.tsv", sep = "\t", quote = F, row.names =
F, col.names = T)
```

```

kegg_gene_list = signif$log2FoldChange
names(kegg_gene_list) = signif$KO_ID
kegg_gene_list = na.omit(kegg_gene_list)
kegg_gene_list = sort(kegg_gene_list, decreasing = TRUE)

if(as.data.table(kk@result)[, .N] > 0){
  keggname = as.data.table(kk@result)[1, ID]
  keggname = as.data.table(kk@result)[qvalue <= 0.05 & !gsub('^map','',ID) %in%
c("01100", "01110"), ID]
  pathview(gene.data = kegg_gene_list,
    pathway.id = gsub('^map','',keggname),
    species = "ko",
    kegg.native = FALSE,
    limit = list(gene=max(abs(signif$log2FoldChange)), cpd=1))
}
#browseKEGG(kk, rownames(kk@result)[3])
}
}

#####
library(pheatmap)
library(openxlsx)

wdir = "/mnt/ssd/ssd_1/workspace/martin/abramis_rutilus_DE/"

FC = 2 # FC cutoff
FC = log(FC, 2) # Get log2FC
FDR = 0.05 # Adj. p-val. cutoff
max_rows = 30
breaksList = seq(0, 1, by = 0.1)

treatment = c("OK", "PH")
control = c("K")
lineages = c("RR", "AB", "BK_AB", "BK_RR", "F1_ABRR", "F1_RRAB")
directions = c("up", "down")

dir = directions[1]
ctrl = control[1]
trt = treatment[1]
lin = lineages[1]
for(dir in directions) {
  for(ctrl in control) {
    for(trt in treatment) {
      conds = c()
      for(lin in lineages) {
        cond = paste(trt, lin, "vs", ctrl, lin, sep = "_")
        inp =
paste0(wdir, "/KEGG_enrichment.using_KAAS", ko_sufix, "/", cond, "/FDR_", FDR, ".l2FC_", FC, "/", dir, "/"
enrichKEGG.tsv")
        if(file.exists(inp)) conds = append(conds, cond)
      }
      tab = Reduce(function(...) {merge(..., by = c("ID", "Description"), all = T)},
lapply(conds, function(cond) {

        fread(paste0(wdir, "/KEGG_enrichment.using_KAAS", ko_sufix, "/", cond, "/FDR_", FDR, ".l2FC_"
, FC, "/", dir, "/enrichKEGG.tsv"),
          sep = "\t",
          select = c("ID", "Description", "qvalue", "geneID"),
          col.names =
c("ID", "Description", paste0(cond, ".qvalue"), paste0(cond, ".geneIDs")))
        })
      )
      fwrite(tab[, .SD, .SDcols=!patterns("qvalue")],

        paste0(wdir, "/KEGG_enrichment.using_KAAS", ko_sufix, "/KEGG_terms_from_KAAS.", trt, "_vs_"
, ctrl, ".FDR_", FDR, ".l2FC_", FC, ".", dir, "_reg.full.tsv"),
        sep = '\t',

```

```

        row.names = F,
        col.names = T,
        quote = F)
    tab_copy = tab[, .SD, .SDcols=patterns("qvalue")]
    tab_copy[is.na(tab_copy)] = 1
    tab_copy[, sum:=rowSums(.SD)]
    tab[, sum:=tab_copy$sum]
    tab_copy = tab[order(sum)]
    fwrite(tab_copy[, .SD, .SDcols=!patterns("geneIDs")],

    paste0(wdir, "/KEGG_enrichment.using_KAAS", ko_sufix, "/heatmap_from_KAAS.", trt, "_vs_", ctrl, ".FDR_", FDR, ".l2FC_", FC, ".", dir, "_reg.full.tsv"),
        sep = '\t',
        row.names = F,
        col.names = T,
        quote = F)
    tab_copy = tab_copy[1:max_rows]
    hm = pheatmap(tab_copy[, .SD, .SDcols=patterns("qvalue")],
        main = paste0("KEGG pathways enrichment for ", trt, "_vs_", ctrl, " (top ", max_rows, ") \n[FDR <= ", FDR, " and log2FC ", ifelse(dir=="up", ">= ", "<= -"), FC, "] \nblack means missing values"),
        cluster_rows = F,
        cluster_cols = F,
        na_col = "black",
        color = colorRampPalette(c("mediumblue", "white"))(length(breaksList)),
        breaks = breaksList,
        labels_row = tab_copy[, paste0(ID, ": ", Description)])

    pdf(paste0(wdir, "/KEGG_enrichment.using_KAAS", ko_sufix, "/heatmap_from_KAAS.", trt, "_vs_", ctrl, ".FDR_", FDR, ".l2FC_", FC, ".", dir, "_reg.top_", max_rows, ".pdf"),
        width = 16,
        height = 9,
        pointsize = 12)
    print(hm)
    dev.off()
  }
}

```
